# Supplementary material for: Facile preparation of dihydro-1,4-benzothiazine derivatives via oxidative ring-expansion of 2-aminobenzothiazoles with olefins
Source: Royal Society of Chemistry journal article supplement (doi:10.1039/d1cc06756g), 2022-01-01
Supplement: d1cc06756g1.pdf [file d1cc06756g1.pdf]

## Supplementary Information

### **Facile preparation of dihydro-1,4-benzothiazine derivatives via oxidative ring-expansion of 2-aminobenzothiazoles with olefins**

Qing Sun and Xiaoguang Bao\*

Innovation Center for Chemical Sciences, College of Chemistry, Chemical Engineering and Materials Science, Soochow University, 199 Ren-Ai Road, Suzhou Industrial Park, Suzhou, Jiangsu 215123, China.

E-mail: [xgbao@suda.edu.cn](mailto:xgbao@suda.edu.cn)

## Table of Contents

|                                                                                                                                                            |    |
|------------------------------------------------------------------------------------------------------------------------------------------------------------|----|
| 1. General Information.....                                                                                                                                | 2  |
| 2. Experimental Section.....                                                                                                                               | 3  |
| 2.1 General procedure for preparation of dihydro-1,4-benzothiazine derivatives via<br>oxidative ring-expansion of 2-aminobenzothiazoles with olefins ..... | 3  |
| 2.2 General procedure for the scaled-up reaction .....                                                                                                     | 3  |
| 3. Optimization of Reaction Conditions .....                                                                                                               | 4  |
| 3.1 Table S1. Screening of oxidants .....                                                                                                                  | 4  |
| 3.2 Table S2. Screening of solvents.....                                                                                                                   | 4  |
| 3.3 Table S3. Screening of temperature.....                                                                                                                | 5  |
| 4. Mechanistic Experiments.....                                                                                                                            | 5  |
| 5. Transformations of the Product <b>3aa</b> .....                                                                                                         | 7  |
| 6. Computational Studies.....                                                                                                                              | 8  |
| 6.1 Computational methods .....                                                                                                                            | 8  |
| 6.2 More computational results .....                                                                                                                       | 9  |
| 7. Characterization of Compounds .....                                                                                                                     | 10 |
| 8. X-ray Crystal Structures .....                                                                                                                          | 23 |
| 9. References.....                                                                                                                                         | 26 |
| 10. NMR spectra.....                                                                                                                                       | 27 |
| 11. Cartesian Coordinates and Energies .....                                                                                                               | 69 |

## 1. General Information

The commercially available reagents were used without further purification unless otherwise noted. Dry solvents were distilled over  $\text{CaH}_2$  and stored under argon in Schlenk tubes. All reactions involving air- or moisture-sensitive reagents or intermediates were carried out in preheated glassware under an argon atmosphere using standard Schlenk techniques. Flash column chromatography was performed with silica gel (300–400 mesh). NMR spectra were recorded on Varian Inova–600 MHz, Inova–400 MHz, Bruker DRX–400 spectrometer. Data were reported as chemical shifts in ppm relative to TMS (0.00 ppm) for  $^1\text{H}$  and  $\text{CDCl}_3$  (77.0 ppm) for  $^{13}\text{C}$ , respectively. The abbreviations used for explaining the multiplicities were as follows: s = singlet, d = doublet, t = triplet, q = quartet, m = multiplet, br = broad.  $^{19}\text{F}$ -NMR spectra were recorded on a BRUKER AVANCE III HD (376 MHz) spectrometer. Mass spectra were measured with an Agilent Technologies 6120 Quadrupole LC/MS. High resolution mass spectrometry (HRMS) were measured with a GCT Premier<sup>TM</sup> and BRUKER micrOTF-Q III. X-ray crystal structure analyses were measured on a Bruker D8 Venture instrument. Melting points were measured using INESA WRR and values are uncorrected.

## 2. Experimental Section

### 2.1 General procedure for preparation of dihydro-1,4-benzothiazine derivatives via oxidative ring-expansion of 2-aminobenzothiazoles with olefins

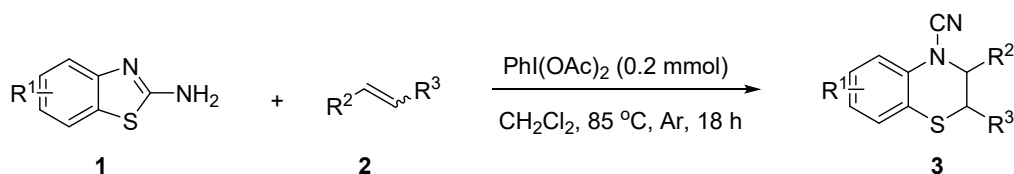

A 10 mL pressure-resistant tube equipped with a magnetic stir bar was charged with the PhI(OAc)<sub>2</sub> (64.4 mg, 0.2 mmol), 2-benzoaminobenzothiazole **1** (0.1 mmol, 1.0 equiv), Then the tube was evacuated and backfilled with argon for three times. Then under Ar atmosphere, dichloromethane (1 mL) and Olefins **2** (0.3 mmol, 3.0 equiv) were added to the system. The mixture was stirred at 85 °C for 18 hours. After completion of the reaction (monitored by TLC), then cooled to room temperature. Solvent and volatile reagents were removed by rotary evaporation and the residue was purified by flash column chromatography on silica gel to give the target product.

### 2.2 General procedure for the scaled-up reaction

A 25 mL round bottom flask equipped with a magnetic stir bar was charged with the PhI(OAc)<sub>2</sub> (644 mg, 2 mmol), Ethyl 2-amino-1,3-benzothiazole-6-carboxylate **1a** (222.3 mg, 1 mmol), Then the tube was evacuated and backfilled with argon for three times. Then under Ar atmosphere, chlorobenzene (10 mL) and Styrene **2** (350 μl, 3 mmol) were added to the system. The mixture was stirred at 85 °C for 18 hours. After completion of the reaction (monitored by TLC), then cooled to room temperature. Solvent and volatile reagents were removed by rotary evaporation and the residue was purified by flash column chromatography on silica gel to give the target product.

### 3. Optimization of Reaction Conditions

#### 3.1 Table S1. Screening of oxidants

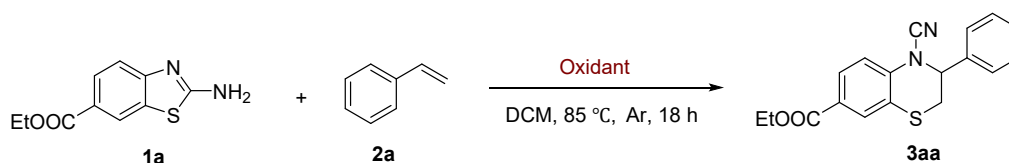

| Entry <sup>[a]</sup> | Oxidant                                      | Yield of <b>3aa</b> (%) <sup>[b]</sup> |
|----------------------|----------------------------------------------|----------------------------------------|
| 1                    | ---                                          | 0                                      |
| 2                    | PhI(OAc) <sub>2</sub>                        | 97                                     |
| 3 <sup>[c]</sup>     | PhI(OAc) <sub>2</sub>                        | 75                                     |
| 4 <sup>[d]</sup>     | PhI(OAc) <sub>2</sub>                        | 83                                     |
| 5 <sup>[e]</sup>     | PhI(OAc) <sub>2</sub>                        | 96                                     |
| 4                    | PhI(OPiv) <sub>2</sub>                       | 96                                     |
| 5                    | PhIO                                         | 68                                     |
| 6                    | PIFA <sup>[f]</sup>                          | 0                                      |
| 7                    | IBX <sup>[g]</sup>                           | Trace                                  |
| 8                    | DMP <sup>[h]</sup>                           | 0                                      |
| 9                    | KIO <sub>4</sub>                             | 0                                      |
| 10                   | Mn(OAc) <sub>3</sub>                         | 0                                      |
| 11                   | K <sub>2</sub> S <sub>2</sub> O <sub>8</sub> | 0                                      |

<sup>a</sup>Unless otherwise specified, all reactions were carried out using **1a** (0.1 mmol, 1 equiv), **2a** (0.3 mmol, 3 equiv), Oxidant (0.2 mmol, 2 equiv), dichloromethane (1 mL) under Ar atmosphere at 85 °C for 18 h. <sup>b</sup>Isolated yields after chromatography are shown. <sup>c</sup>0.1 mmol PhI(OAc)<sub>2</sub> was added. <sup>d</sup>DCM solvent without anhydrous treatment and performed under air atmosphere. <sup>e</sup>Using anhydrous DCM solvent and performed under air atmosphere. <sup>f</sup>PIFA: [Bis(trifluoroacetoxy)iodo] benzene. <sup>g</sup>IBX: 2-Iodoxybenzoic acid. <sup>h</sup>DMP: Dess-Martin Periodinane.

#### 3.2 Table S2. Screening of solvents

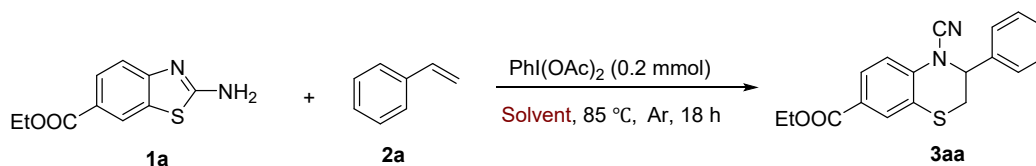

| Entry <sup>[a]</sup> | Solvent            | Yield of <b>3aa</b> (%) <sup>[b]</sup> |
|----------------------|--------------------|----------------------------------------|
| 1                    | DCM                | 97                                     |
| 2                    | DCE                | 87                                     |
| 3                    | MeCN               | 66                                     |
| 4                    | THF                | 82                                     |
| 5                    | CH <sub>3</sub> OH | Trace                                  |
| 6                    | EA                 | 78                                     |

|   |                   |       |
|---|-------------------|-------|
| 7 | PhCl              | 85    |
| 8 | CHCl <sub>3</sub> | 28    |
| 9 | DMSO              | Trace |

<sup>a</sup>Unless otherwise specified, all reactions were carried out using **1a** (0.1 mmol, 1 equiv), **2a** (0.3 mmol, 3 equiv), PhI(OAc)<sub>2</sub> (0.2 mmol, 2 equiv), solvent (1 mL) under Ar atmosphere at 85 °C for 18 h. <sup>b</sup>Isolated yields after chromatography are shown.

### 3.3 Table S3. Screening of temperature

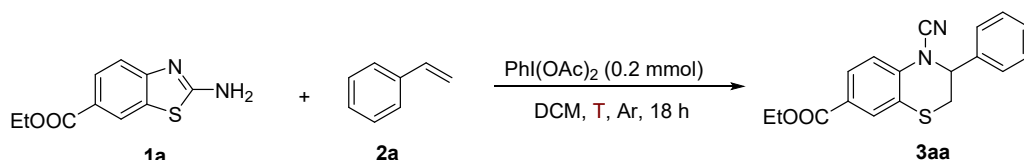

| Entry <sup>[a]</sup> | Temperature (°C) | Yield of <b>3aa</b> (%) <sup>[b]</sup> |
|----------------------|------------------|----------------------------------------|
| 1                    | 65               | 76                                     |
| 2                    | 85               | 97                                     |
| 3                    | 105              | 97                                     |

<sup>a</sup>Unless otherwise specified, all reactions were carried out using **1a** (0.1 mmol, 1 equiv), **2a** (0.3 mmol, 3 equiv), PhI(OAc)<sub>2</sub> (0.2 mmol, 2 equiv), dichloromethane (1 mL) under Ar atmosphere at 85 °C for 18 h. <sup>b</sup>Isolated yields after chromatography are shown.

## 4. Mechanistic Experiments

### Radical trapping experiment

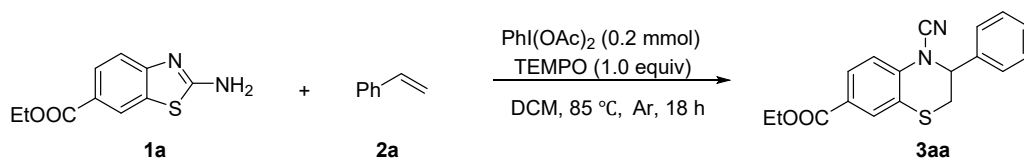

A 10 mL pressure-resistant tube equipped with a magnetic stir bar was charged with the PhI(OAc)<sub>2</sub> (64.4 mg, 0.2 mmol), **1a** (0.1 mmol, 1.0 equiv) and TEMPO (0.1 mmol, 1 equiv). Then the tube was evacuated and backfilled with argon for three times. Then under Ar atmosphere, dichloromethane (1 mL) and **2a** (0.3 mmol, 3.0 equiv) were added to the system. The mixture was stirred at 85 °C for 18 hours. After completion of the reaction (monitored by TLC), then cooled to room temperature. Solvent and volatile reagents were removed by rotary evaporation and the residue was purified by flash column chromatography on silica gel to afford 20.5 mg of **3aa** (63%).

### General procedure for the synthesis of N,N-dimethylbenzo[d]thiazol-2-amine (**1p**)

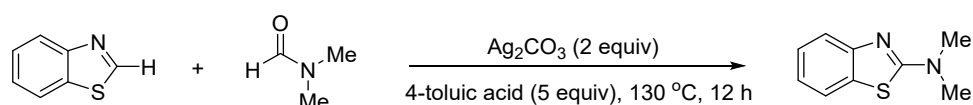

**1p** was synthesized according to relevant literature<sup>1</sup>. To a test tube equipped with a magnetic stir bar was charged with  $\text{Ag}_2\text{CO}_3$  (275 mg, 1.0 mmol, 2 equiv), 4-toluic acid (340 mg, 2.5 mmol, 5 equiv), DMF (40 equiv) and Benzothiazole (0.5 mmol, 1 equiv) under air. The test tube was sealed with a rubber septum, and stirred for 12 h at 130 °C under air. The crude mixture was filtered through a plug of celite and then washed with EtOAc (20 mL). The filtrate was washed with a saturated solution of  $\text{NaHCO}_3$  (3 x 20 mL) and the aqueous layer was extracted again with EtOAc (3 x 20 mL). Organic layer was dried over  $\text{MgSO}_4$  and concentrated under reduced pressure. The crude reaction mixture was purified by flash column chromatography to afford light yellow solid.

### Reaction procedure of **1p** with **2a**

A 10 mL pressure-resistant tube equipped with a magnetic stir bar was charged with **1p** (0.1 mmol) and  $\text{PhI}(\text{OAc})_2$  (0.2 mmol, 2 equiv) in 1 mL DCM was added **2a** (0.3 mmol, 3 equiv), under an argon atmosphere, at 85 °C. The reaction mixture was then stirred for 18 hours.

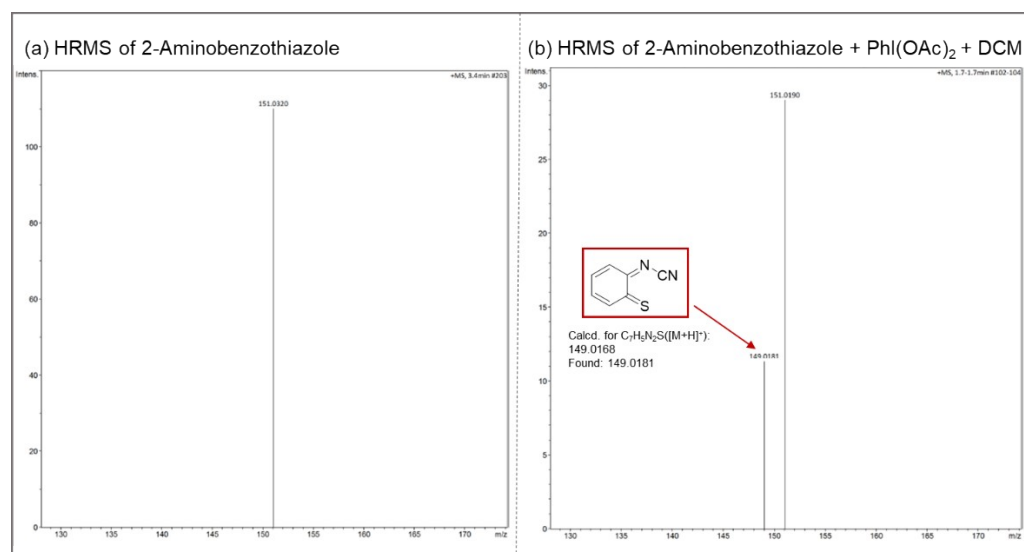

**Figure S1.** HRMS analysis for 2-aminobenzothiazole and its conversion in the presence of  $\text{PhI}(\text{OAc})_2$  (0.2 mmol) in DCM (1 mL).

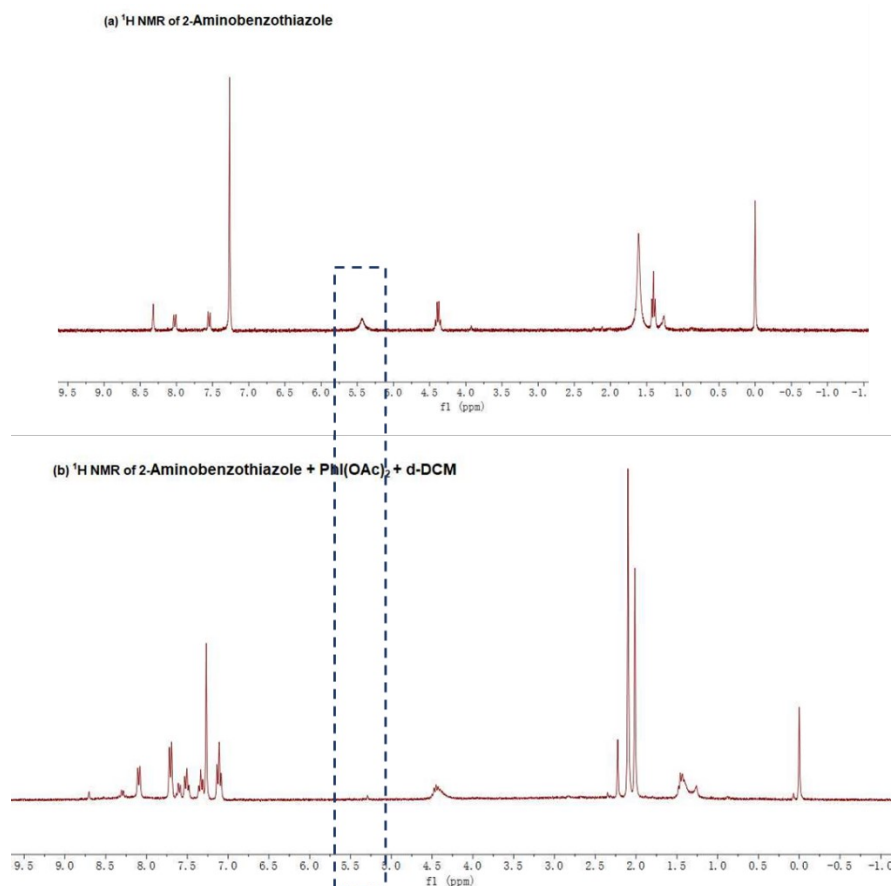

**Figure S2.** Comparison of <sup>1</sup>H NMR of 2-aminobenzothiazole and its conversion in the presence of PhI(OAc)<sub>2</sub> (0.2 mmol) in d-DCM (1 mL).

## 5. Transformations of the synthesized product **3aa**

### Oxidation Experiments

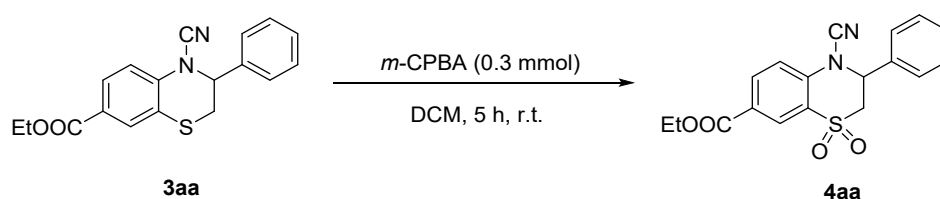

At room temperature, **3aa** (32.4 mg, 0.1 mmol), 85% *m*-CPBA (60.7 mg, 0.3 mmol) and 1 mL CH<sub>2</sub>Cl<sub>2</sub> was added to a reaction tube. The mixture was then stirred for 5 h until substrate consumed as indicated by TLC. The resulting mixture was concentrated and extracted with dichloromethane (3 x 15 mL). The combined organic layer was washed with brine (20 mL), dried over anhydrous MgSO<sub>4</sub> and concentrated. The residue was purified by silica gel column chromatography with petroleum ether (PE)/ethyl acetate (EA) (5:1) as the eluent to give **4aa** as a white solid (33.5 mg, 94% yield).



## Hydrolysis of cyanamide

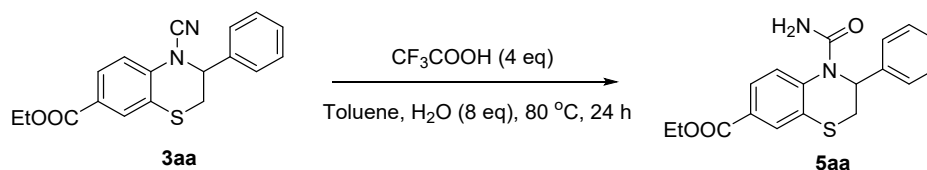

**5aa** was synthesized according to literature<sup>2</sup>. **3aa** (0.2 mmol, 1 equiv), trifluoroacetic acid (0.8 mmol, 4 equiv) and  $\text{H}_2\text{O}$  (1.6 mmol, 8 equiv) were added to a round flask (10 mL), heated to  $80\text{ }^\circ\text{C}$  and kept it stirring for 24 h. The mixture was cooled to room temperature, extracted with EtOAc; the organic layers were combined, washed by brine, dried by  $\text{MgSO}_4$  and concentrated under reduced pressure to give a residue which was purified by silica gel column chromatography with petroleum ether (PE)/ethyl acetate (EA) (1:1) as the eluent to give product.

## 6. Computational Studies

### 6.1 Computational methods

The B3LYP density functional method with Grimme-D3 correction<sup>3</sup> was employed to carry out the computational studies. For geometry optimizations, the LANL2DZ basis set in conjunction with the LANL2DZ pseudopotential<sup>4</sup> was used for I atom. The 6-31G(d,p) basis set was used for other atoms. Vibrational frequency analyses at the same level of theory were performed on all the optimized geometries to characterize stationary points as local minima (no imaginary frequency) or transition states (one imaginary frequency). In addition, intrinsic reaction coordinate (IRC) calculations<sup>5</sup> were used to verify that the transition state connects with appropriate reactant and product. The gas-phase Gibbs energies for all species were obtained at 298.15 K and 1 atm at their respective optimized structures. To consider the effect of solvation, B3LYP-D3 functional with the SMD<sup>6</sup> continuum solvation model (in acetonitrile solvent) was used in single-point energy calculations. A larger basis set, SDD<sup>7</sup> for I atom and 6-311++G(d,p) for the remaining atoms, was utilized for such single-point energy calculation. The solvation Gibbs energy was used for discussion and its value was obtained from the addition of solvation single-point energy and gas-phase thermal correction to Gibbs energy. All calculations were carried out with the Gaussian 09 suite of programs<sup>8</sup>. The 3D structures of optimized intermediates or transition states were demonstrated using the software of CYLView<sup>9</sup>.

## 6.2 More computational results

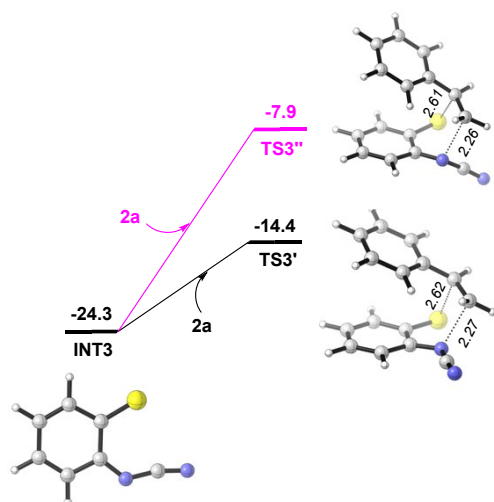

**Figure S3.** Comparison of the orientation of the cyanamide group in TS3' and TS3''.

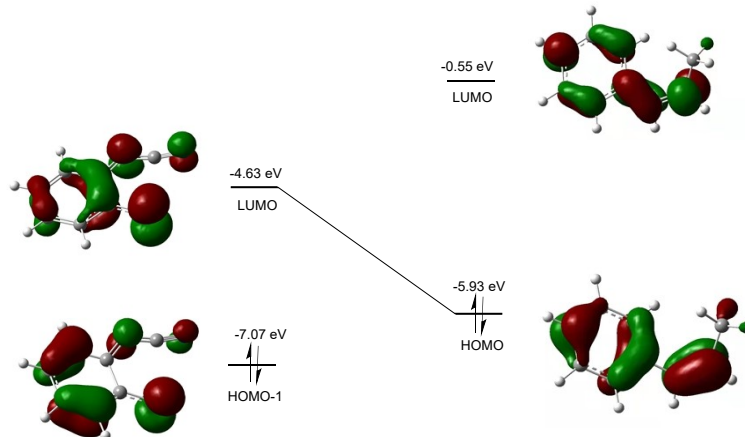

**Figure S4.** Frontier molecular orbital analysis for INT3 and 2s in the [4+2] cycloaddition.

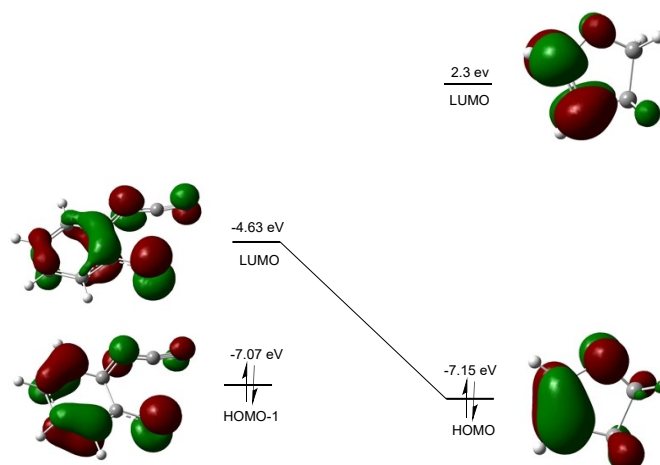

**Figure S5.** Frontier molecular orbital analysis for INT3 and 2u in the [4+2] cycloaddition.

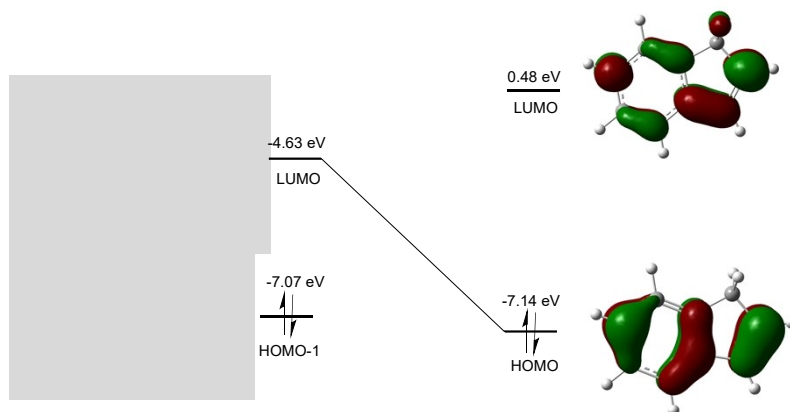

**Figure S6.** Frontier molecular orbital analysis for INT3 and 2v in the [4+2] cycloaddition.

## 7. Characterization of Compounds

### ethyl 4-cyano-3-phenyl-3,4-dihydro-2H-benzo[b][1,4]thiazine-7-carboxylate (**3aa**)

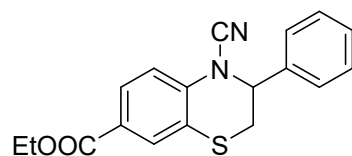

With general procedure 2.1, reaction of **1a** (0.1 mmol) and **2a** (0.3 mmol) provided the product **3aa** after flash column chromatography (10 vol % EtOAc in petroleum ether) as a colorless solid (31.5 mg, 97 %), m.p. 110.6–112.3 °C. <sup>1</sup>H NMR (400 MHz, CDCl<sub>3</sub>) δ 7.93 – 7.83 (m, 2H), 7.46 – 7.39 (m, 4H), 7.33 – 7.28 (m, 2H), 5.23 (dd, *J* = 7.0, 3.4 Hz, 1H), 4.36 (q, *J* = 7.1 Hz, 2H), 3.30 (dd, *J* = 13.6, 3.4 Hz, 1H), 3.18 (dd, *J* = 13.6, 7.0 Hz, 1H), 1.38 (t, *J* = 7.1 Hz, 3H). <sup>13</sup>C NMR (100 MHz, CDCl<sub>3</sub>) δ 165.4, 138.3, 137.1, 130.3, 129.5, 129.2, 128.1, 126.8, 125.9, 120.6, 117.2, 111.4, 62.9, 61.2, 31.9, 14.4. HRMS (ESI-TOF): calcd. for C<sub>18</sub>H<sub>16</sub>N<sub>2</sub>NaO<sub>2</sub>S([M+Na]<sup>+</sup>): 347.0825, found: 347.0820.

### 7-bromo-3-phenyl-2,3-dihydro-4H-benzo[b][1,4]thiazine-4-carbonitrile (**3ba**)

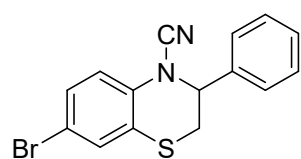

With general procedure 2.1, reaction of **1b** (0.1 mmol) and **2a** (0.3 mmol) provided the product **3ba** after flash column chromatography (1 vol % EtOAc in petroleum ether) as a yellow solid (24.7 mg, 75 %). m.p. 125.8–126.2 °C. <sup>1</sup>H NMR (400 MHz, CDCl<sub>3</sub>) δ 7.45 – 7.38 (m, 3H), 7.34 – 7.24 (m, 5H), 5.18 (dd, *J* = 7.1, 3.4 Hz, 1H), 3.27 (dd, *J* = 13.6, 3.5 Hz, 1H), 3.16 (dd, *J* = 13.6, 7.1 Hz, 1H). <sup>13</sup>C NMR (100 MHz, CDCl<sub>3</sub>) δ 137.1, 133.8, 130.9, 129.7, 129.5, 129.2, 126.8, 122.9, 119.0, 116.2, 111.7, 62.6, 32.0. HRMS (ESI-TOF): calcd. for C<sub>15</sub>H<sub>11</sub>BrN<sub>2</sub>NaS([M+Na]<sup>+</sup>): 352.9719, found: 352.9728.

### 7-chloro-3-phenyl-2,3-dihydro-4H-benzo[b][1,4]thiazine-4-carbonitrile (**3ca**)

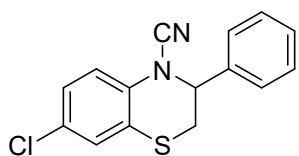

With general procedure 2.1, reaction of **1c** (0.1 mmol) and **2a** (0.3 mmol) provided the product **3ca** after flash column chromatography (1 vol % EtOAc in petroleum ether) as a yellow oil (20.6 mg, 72%). <sup>1</sup>H NMR (400 MHz, CDCl<sub>3</sub>) δ 7.44 – 7.38 (m, 3H), 7.34 – 7.27 (m, 3H), 7.19 – 7.13 (m, 2H), 5.17 (dd, *J* = 7.1, 3.4 Hz, 1H), 3.27 (dd, *J* = 13.6, 3.5 Hz, 1H), 3.16 (dd, *J* = 13.6, 7.1 Hz, 1H)., <sup>13</sup>C NMR (100 MHz, CDCl<sub>3</sub>) δ 137.2, 133.2, 129.4, 129.2, 128.8, 128.1, 126.8, 122.5, 118.7, 111.8, 62.6, 32.1. HRMS (ESI-TOF): calcd. for C<sub>15</sub>H<sub>11</sub>CIN<sub>2</sub>NaS([M+Na]<sup>+</sup>): 309.0224, found: 309.0226.

### 7-fluoro-3-phenyl-2,3-dihydro-4H-benzo[b][1,4]thiazine-4-carbonitrile (**3da**)

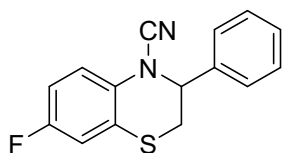

With general procedure 2.1, reaction of **1d** (0.1 mmol) and **2a** (0.3 mmol) provided the product **3da** after flash column chromatography (1 vol % EtOAc in petroleum ether) as a yellow oil (14.3 mg, 53%). <sup>1</sup>H NMR (400 MHz, CDCl<sub>3</sub>) δ 7.44 – 7.29 (m, 6H), 6.95 – 6.86 (m, 2H), 5.16 (dd, *J* = 7.2, 3.5 Hz, 1H), 3.27 (dd, *J* = 13.6, 3.5 Hz, 1H), 3.18 (dd, *J* = 13.6, 7.2 Hz, 1H)., <sup>13</sup>C NMR (100 MHz, CDCl<sub>3</sub>) δ 158.4 (d, *J*<sub>C-F</sub> = 244 Hz), 137.2, 130.8 (d, *J*<sub>C-F</sub> = 2.9 Hz), 129.4, 129.2, 126.8, 122.7 (d, *J*<sub>C-F</sub> = 8.5 Hz), 119.0 (*J*<sub>C-F</sub> = 8.6 Hz), 115.2 (d, *J*<sub>C-F</sub> = 25.1 Hz), 113.9 (d, *J*<sub>C-F</sub> = 23.1 Hz), 112.3, 62.5, 32.2. <sup>19</sup>F NMR (376 MHz, CDCl<sub>3</sub>) δ -118.9 (s, 1F). HRMS (ESI-TOF): calcd. for C<sub>15</sub>H<sub>11</sub>FN<sub>2</sub>NaS([M+Na]<sup>+</sup>): 293.0519, found: 293.0523.

### 3-phenyl-7-(trifluoromethyl)-2,3-dihydro-4H-benzo[b][1,4]thiazine-4-carbonitrile (**3ea**)

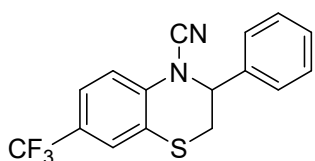

With general procedure 2.1, reaction of **1e** (0.1 mmol) and **2a** (0.3 mmol) provided the product **3ea** after flash column chromatography (1 vol % EtOAc in petroleum ether) as a yellow oil (28.1 mg, 88%). <sup>1</sup>H NMR (400 MHz, CDCl<sub>3</sub>) δ 7.51 – 7.38 (m, 6H), 7.32 – 7.26 (m, 2H), 5.23 (dd, *J* = 6.9, 3.4 Hz, 1H), 3.29 (dd, *J* = 13.6, 3.5 Hz, 1H), 3.18 (dd, *J* = 13.7, 6.9 Hz, 1H)., <sup>13</sup>C NMR (100 MHz, CDCl<sub>3</sub>) δ 137.5, 137.0, 129.6, 129.3, 126.8, 126.3, (d, *J*<sub>C-F</sub> = 33.4 Hz), 126.0 (q, *J*<sub>C-F</sub> = 3.8 Hz), 126.0 (d, *J*<sub>C-F</sub> = 33.4 Hz), 125.0, 123.8 (q, *J*<sub>C-F</sub> = 3.7 Hz), 122.3, 121.6, 62.8, 31.9. <sup>19</sup>F NMR (376 MHz, CDCl<sub>3</sub>) δ -62.2 (s, 3F). HRMS (ESI-TOF): calcd. for C<sub>16</sub>H<sub>11</sub>F<sub>3</sub>N<sub>2</sub>NaS([M+Na]<sup>+</sup>): 343.0487, found: 343.0477.

### 6-chloro-3-phenyl-2,3-dihydro-4H-benzo[b][1,4]thiazine-4-carbonitrile (**3fa**)

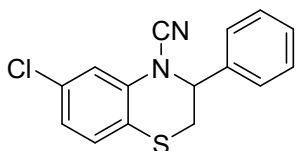

With general procedure 2.1, reaction of **1f** (0.1 mmol) and **2a** (0.3 mmol) provided the product **3fa** after flash column

chromatography (1 vol % EtOAc in petroleum ether) as a colorless oil (19.2 mg, 67%). <sup>1</sup>H NMR (400 MHz, CDCl<sub>3</sub>) δ 7.48 – 7.35 (m, 4H), 7.29 (dd, *J* = 7.5, 2.1 Hz, 2H), 7.11 (d, *J* = 8.4 Hz, 1H), 6.99 (dd, *J* = 8.4, 2.1 Hz, 1H), 5.18 (dd, *J* = 7.1, 3.4 Hz, 1H), 3.26 (dd, *J* = 13.6, 3.5 Hz, 1H), 3.15 (dd, *J* = 13.6, 7.2 Hz, 1H)., <sup>13</sup>C NMR (100 MHz, CDCl<sub>3</sub>) δ 137.1, 135.6, 132.3, 129.7, 129.5, 129.2, 126.8, 123.9, 119.2, 117.6, 111.6, 62.7, 32.1. HRMS (ESI-TOF): calcd. for C<sub>15</sub>H<sub>11</sub>ClN<sub>2</sub>NaS([M+Na]<sup>+</sup>): 309.0224, found: 309.0223.

#### 6-bromo-3-phenyl-2,3-dihydro-4H-benzo[b][1,4]thiazine-4-carbonitrile (**3ga**)

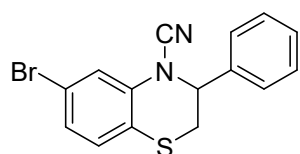

With general procedure 2.1, reaction of **1g** (0.1 mmol) and **2a** (0.3 mmol) provided the product **3ga** after flash column chromatography (1 vol % EtOAc in petroleum ether) as a colorless oil (21.2 mg, 64%). <sup>1</sup>H NMR (400 MHz, CDCl<sub>3</sub>) δ 7.57 (d, *J* = 1.9 Hz, 1H), 7.41 (qd, *J* = 5.3, 1.8 Hz, 3H), 7.29 (dd, *J* = 7.5, 2.1 Hz, 2H), 7.12 (dd, *J* = 8.3, 1.9 Hz, 1H), 7.04 (d, *J* = 8.3 Hz, 1H), 5.17 (dd, *J* = 7.1, 3.5 Hz, 1H), 3.26 (dd, *J* = 13.6, 3.5 Hz, 1H), 3.14 (dd, *J* = 13.6, 7.1 Hz, 1H)., <sup>13</sup>C NMR (100 MHz, CDCl<sub>3</sub>) δ 137.1, 135.7, 129.9, 129.5, 129.2, 126.8, 126.8, 120.4, 119.9, 119.7, 111.6, 62.7, 32.1. HRMS (ESI-TOF): calcd. for C<sub>15</sub>H<sub>11</sub>BrN<sub>2</sub>NaS([M+Na]<sup>+</sup>): 352.9719, found: 352.9710.

#### 5-fluoro-3-phenyl-2,3-dihydro-4H-benzo[b][1,4]thiazine-4-carbonitrile (**3ha**)

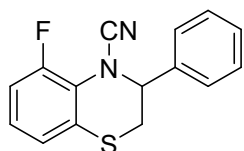

With general procedure 2.1, reaction of **1h** (0.1 mmol) and **2a** (0.3 mmol) provided the product **3ha** after flash column chromatography (1 vol % EtOAc in petroleum ether) as a yellow oil (17.5 mg, 65%). <sup>1</sup>H NMR (400 MHz, CDCl<sub>3</sub>) δ 7.42 – 7.34 (m, 5H), 7.03 – 6.94 (m, 3H), 5.15 (dd, *J* = 8.6, 4.1 Hz, 1H), 3.37 (dd, *J* = 13.6, 4.1 Hz, 1H), 3.21 (dd, *J* = 13.6, 8.6 Hz, 1H)., <sup>13</sup>C NMR (100 MHz, CDCl<sub>3</sub>) δ 154.4 (d, *J*<sub>C-F</sub> = 250.8 Hz), 136.4, 129.3, 129.2, 127.8, 126.7, 125.3 (d, *J*<sub>C-F</sub> = 8.4 Hz), 124.1 (d, *J*<sub>C-F</sub> = 8.4 Hz), 124.0 (d, *J*<sub>C-F</sub> = 10.8 Hz), 114.1 (d, *J*<sub>C-F</sub> = 19.7 Hz), 112.7, 64.8, 33.2. <sup>19</sup>F NMR (376 MHz, CDCl<sub>3</sub>) δ -121.0 (s, 1F). HRMS (ESI-TOF): calcd. for C<sub>15</sub>H<sub>11</sub>FN<sub>2</sub>NaS([M+Na]<sup>+</sup>): 293.0519, found: 293.0531.

#### 5,7-difluoro-3-phenyl-2,3-dihydro-4H-benzo[b][1,4]thiazine-4-carbonitrile (**3ia**)

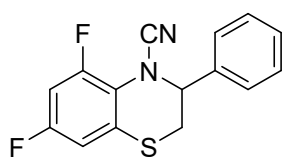

With general procedure 2.1, reaction of **1i** (0.1 mmol) and **2a** (0.3 mmol) provided the product **3ia** after flash column chromatography (1 vol % EtOAc in petroleum ether) as a colorless solid (14.3 mg, 50%). m.p. 105.1-106.2 °C. <sup>1</sup>H NMR (400 MHz, CDCl<sub>3</sub>) δ 7.44 – 7.35 (m, 5H), 6.81 – 6.71 (m, 2H), 5.10 (dd, *J* = 8.4, 4.0

Hz, 1H), 3.43 (dd,  $J = 13.6, 4.0$  Hz, 1H), 3.31 (dd,  $J = 13.5, 8.4$  Hz, 1H),  $^{13}\text{C}$  NMR (100 MHz,  $\text{CDCl}_3$ )  $\delta$  156.0 (dd,  $J_{\text{C-F}} = 247.9, 12.0$  Hz), 154.6 (dd,  $J_{\text{C-F}} = 253.4, 12.8$  Hz), 135.8, 129.4, 129.3, 126.8, 120.2 (dd,  $J_{\text{C-F}} = 11.4, 3.9$  Hz), 112.5, 110.6 (dd,  $J_{\text{C-F}} = 24.5, 3.8$  Hz), 102.6 (dd,  $J_{\text{C-F}} = 26.6, 23.4$  Hz), 63.7, 32.6.  $^{19}\text{F}$  NMR (376 MHz,  $\text{CDCl}_3$ )  $\delta$  -113.1 (d,  $J = 6.0$  Hz, 1F), -117.0 (d,  $J = 6.1$  Hz, 1F). HRMS (ESI-TOF): calcd. for  $\text{C}_{15}\text{H}_{10}\text{F}_2\text{N}_2\text{NaS}([\text{M}+\text{Na}]^+)$ : 311.0425, found: 311.0443.

#### 7-methyl-3-phenyl-2,3-dihydro-4H-benzo[b][1,4]thiazine-4-carbonitrile (3ja)

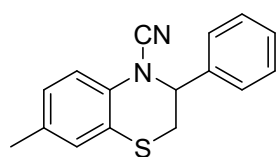

With general procedure 2.1, reaction of **1j** (0.1 mmol) and **2a** (0.3 mmol) provided the product **3ja** after flash column chromatography (1 vol % EtOAc in petroleum ether) as a yellow oil (12.1 mg, 45%).  $^1\text{H}$  NMR (400 MHz,  $\text{CDCl}_3$ )  $\delta$  7.43 – 7.37 (m, 3H), 7.34 – 7.28 (m, 3H), 7.03 – 6.97 (m, 2H), 5.17 (dd,  $J = 7.2, 3.5$  Hz, 1H), 3.27 (dd,  $J = 13.5, 3.5$  Hz, 1H), 3.15 (dd,  $J = 13.5, 7.2$  Hz, 1H), 2.28 (s, 3H),  $^{13}\text{C}$  NMR (100 MHz,  $\text{CDCl}_3$ )  $\delta$  137.7, 133.5, 132.1, 129.2, 129.1, 129.0, 127.7, 126.8, 120.4, 117.6, 112.6, 62.6, 32.4, 20.5. HRMS (ESI-TOF): calcd. for  $\text{C}_{16}\text{H}_{14}\text{N}_2\text{NaS}([\text{M}+\text{Na}]^+)$ : 289.0770, found: 289.0811.

#### 5-methyl-3-phenyl-2,3-dihydro-4H-benzo[b][1,4]thiazine-4-carbonitrile (3ka)

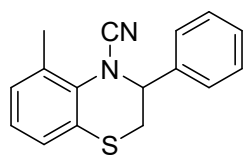

With general procedure 2.1, reaction of **1k** (0.1 mmol) and **2a** (0.3 mmol) provided the product **3ka** after flash column chromatography (1 vol % EtOAc in petroleum ether) as a yellow oil (20.9 mg, 79%).  $^1\text{H}$  NMR (400 MHz,  $\text{CDCl}_3$ )  $\delta$  7.37 (ddt,  $J = 8.5, 6.1, 3.2$  Hz, 5H), 7.11 (q,  $J = 4.0, 3.5$  Hz, 1H), 7.04 (d,  $J = 5.0$  Hz, 2H), 5.00 (dd,  $J = 9.6, 4.7$  Hz, 1H), 3.39 (dd,  $J = 13.3, 4.7$  Hz, 1H), 3.33 (dd,  $J = 13.3, 9.6$  Hz, 1H), 2.43 (s, 3H),  $^{13}\text{C}$  NMR (100 MHz,  $\text{CDCl}_3$ )  $\delta$  136.9, 134.1, 132.8, 129.2, 129.2, 129.2, 128.3, 127.0, 126.3, 126.2, 113.4, 65.4, 33.3, 18.4. HRMS (ESI-TOF): calcd. for  $\text{C}_{16}\text{H}_{14}\text{N}_2\text{NaS}([\text{M}+\text{Na}]^+)$ : 289.0770, found: 289.0773.

#### 7-methoxy-3-phenyl-2,3-dihydro-4H-benzo[b][1,4]thiazine-4-carbonitrile (3la)

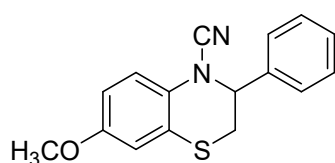

With general procedure 2.1, reaction of **1l** (0.1 mmol) and **2a** (0.3 mmol) provided the product **3la** after flash column chromatography (1 vol % EtOAc in petroleum ether) as a yellow oil (15.0 mg, 53%).  $^1\text{H}$  NMR (400 MHz,  $\text{CDCl}_3$ )  $\delta$  7.43 – 7.36 (m, 3H), 7.34 – 7.29 (m, 3H), 6.78 – 6.71 (m, 2H), 5.13 (dd,  $J = 7.3, 3.5$  Hz, 1H), 3.76 (s, 3H), 3.26 (dd,  $J = 13.5, 3.6$  Hz, 1H), 3.16 (dd,  $J = 13.5, 7.3$  Hz, 1H),  $^{13}\text{C}$  NMR (100 MHz,  $\text{CDCl}_3$ )  $\delta$  155.7, 137.6, 129.2, 129.1,

127.9, 126.9, 122.0, 118.9, 113.2, 113.2, 112.9, 62.5, 55.7, 32.5. HRMS (ESI-TOF): calcd. for C<sub>16</sub>H<sub>14</sub>N<sub>2</sub>NaOS([M+Na]<sup>+</sup>): 305.0719, found: 305.0728.

### 5-methoxy-3-phenyl-2,3-dihydro-4H-benzo[b][1,4]thiazine-4-carbonitrile (**3ma**)

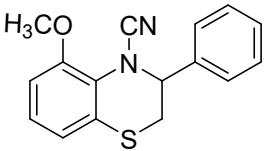 With general procedure 2.1, reaction of **1m** (0.1 mmol) and **2a** (0.3 mmol) provided the product **3ma** after flash column chromatography (1 vol % EtOAc in petroleum ether) as a colorless oil (18.1 mg, 64%). <sup>1</sup>H NMR (400 MHz, CDCl<sub>3</sub>) δ 7.42 – 7.31 (m, 5H), 7.04 (t, *J* = 8.1 Hz, 1H), 6.79 (ddd, *J* = 17.8, 8.1, 1.3 Hz, 2H), 5.12 (dd, *J* = 8.9, 4.3 Hz, 1H), 3.95 (s, 3H), 3.39 (dd, *J* = 13.4, 4.3 Hz, 1H), 3.20 (dd, *J* = 13.4, 8.9 Hz, 1H)., <sup>13</sup>C NMR (100 MHz, CDCl<sub>3</sub>) δ 152.1, 137.0, 129.0, 128.9, 127.5, 126.7, 125.5, 124.5, 120.5, 113.8, 109.6, 65.0, 56.2, 33.5. HRMS (ESI-TOF): calcd. for C<sub>16</sub>H<sub>14</sub>N<sub>2</sub>NaOS([M+Na]<sup>+</sup>): 305.0719, found: 305.0730.

### 3-phenyl-7-(trifluoromethoxy)-2,3-dihydro-4H-benzo[b][1,4]thiazine-4-carbonitrile (**3na**)

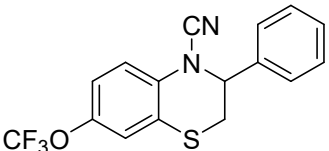 With general procedure 2.1, reaction of **1n** (0.1 mmol) and **2a** (0.3 mmol) provided the product **3na** after flash column chromatography (1 vol % EtOAc in petroleum ether) as a yellow oil (24.1 mg, 72%). <sup>1</sup>H NMR (400 MHz, CDCl<sub>3</sub>) δ 7.45 – 7.37 (m, 4H), 7.33 – 7.28 (m, 2H), 7.09 – 7.04 (m, 2H), 5.19 (dd, *J* = 7.1, 3.5 Hz, 1H), 3.28 (dd, *J* = 13.6, 3.5 Hz, 1H), 3.19 (dd, *J* = 13.6, 7.1 Hz, 1H)., <sup>13</sup>C NMR (100 MHz, CDCl<sub>3</sub>) δ 144.6 (d, *J*<sub>C-F</sub> = 2.2 Hz), 137.1, 133.3, 129.5, 129.3, 126.8, 122.5, 121.2, 120.4 (d, *J*<sub>C-F</sub> = 257.9 Hz), 119.6, 118.6, 111.8, 62.6, 32.1. <sup>19</sup>F NMR (376 MHz, CDCl<sub>3</sub>) δ -58.1 (s, 3F). HRMS (ESI-TOF): calcd. for C<sub>16</sub>H<sub>11</sub>F<sub>3</sub>N<sub>2</sub>NaOS([M+Na]<sup>+</sup>): 359.0436, found: 359.0432.

### 3-phenyl-2,3-dihydro-4H-benzo[b][1,4]thiazine-4-carbonitrile (**3oa**)

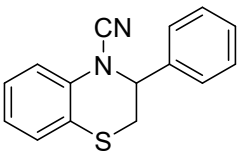 With general procedure 2.1, reaction of **1o** (0.1 mmol) and **2a** (0.3 mmol) provided the product **3oa** after flash column chromatography (1 vol % EtOAc in petroleum ether) as a yellow oil (14.1 mg, 56%). <sup>1</sup>H NMR (400 MHz, CDCl<sub>3</sub>) δ 7.40 (dtd, *J* = 6.7, 5.1, 1.4 Hz, 4H), 7.31 (dd, *J* = 7.6, 2.0 Hz, 2H), 7.22 – 7.17 (m, 2H), 7.03 – 6.98 (m, 1H), 5.19 (dd, *J* = 7.1, 3.5 Hz, 1H), 3.27 (dd, *J* = 13.5, 3.5 Hz, 1H), 3.16 (dd, *J* = 13.5, 7.1 Hz, 1H). <sup>13</sup>C NMR (100 MHz, CDCl<sub>3</sub>) δ 137.6, 134.6, 129.3, 129.1, 128.8, 126.9, 126.9, 123.7, 120.8, 117.7, 112.3, 62.8, 32.3. HRMS (ESI-TOF): calcd. for C<sub>15</sub>H<sub>12</sub>N<sub>2</sub>NaS([M+Na]<sup>+</sup>): 275.0613, found: 275.0620.

**ethyl 4-cyano-3-(p-tolyl)-3,4-dihydro-2H-benzo[b][1,4]thiazine-7-carboxylate (3ab)**

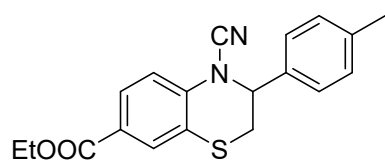

With general procedure 2.1, reaction of **1a** (0.1 mmol) and **2b** (0.3 mmol) provided the product **3ab** after flash column chromatography (1 vol % EtOAc in petroleum ether) as a colorless solid (25.4 mg, 75%). m.p. 163.7-164.5 °C. <sup>1</sup>H NMR (400 MHz, CDCl<sub>3</sub>) δ 7.92 – 7.80 (m, 2H), 7.43 (d, *J* = 8.7 Hz, 1H), 7.25 – 7.16 (m, 4H), 5.17 (dd, *J* = 7.2, 3.4 Hz, 1H), 4.36 (q, *J* = 7.1 Hz, 2H), 3.26 (dd, *J* = 13.6, 3.4 Hz, 1H), 3.18 (dd, *J* = 13.6, 7.2 Hz, 1H), 2.36 (s, 3H), 1.38 (t, *J* = 7.1 Hz, 3H)., <sup>13</sup>C NMR (100 MHz, CDCl<sub>3</sub>) δ 165.3, 139.5, 138.4, 134.1, 130.2, 129.9, 128.0, 126.8, 125.8, 120.6, 117.2, 111.4, 62.8, 61.2, 31.9, 21.3, 14.4. HRMS (ESI-TOF): calcd. for C<sub>19</sub>H<sub>18</sub>N<sub>2</sub>NaO<sub>2</sub>S([M+Na]<sup>+</sup>): 361.0981, found: 361.0988.

**ethyl 3-(4-(tert-butyl)phenyl)-4-cyano-3,4-dihydro-2H-benzo[b][1,4]thiazine-7-carboxylate (3ac)**

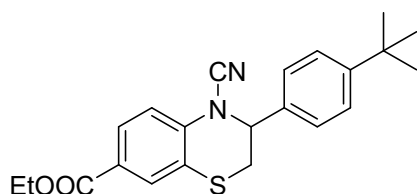

With general procedure 2.1, reaction of **1a** (0.1 mmol) and **2c** (0.3 mmol) provided the product **3ac** after flash column chromatography (1 vol % EtOAc in petroleum ether) as a colorless oil (31.9 mg, 84%). <sup>1</sup>H NMR (400 MHz, CDCl<sub>3</sub>) δ 7.91 – 7.83 (m, 2H), 7.44 (dd, *J* = 8.5, 6.0 Hz, 3H), 7.26 – 7.21 (m, 2H), 5.21 (dd, *J* = 7.1, 3.4 Hz, 1H), 4.36 (q, *J* = 7.1 Hz, 2H), 3.29 (dd, *J* = 13.6, 3.5 Hz, 1H), 3.18 (dd, *J* = 13.6, 7.1 Hz, 1H), 1.39 (t, *J* = 7.1 Hz, 3H), 1.32 (s, 9H)., <sup>13</sup>C NMR (100 MHz, CDCl<sub>3</sub>) δ 165.4, 152.5, 138.4, 134.1, 130.3, 128.1, 126.6, 126.1, 125.8, 120.7, 117.2, 111.5, 62.7, 61.2, 34.7, 32.0, 31.3, 14.4. HRMS (ESI-TOF): calcd. for C<sub>22</sub>H<sub>24</sub>N<sub>2</sub>NaO<sub>2</sub>S([M+Na]<sup>+</sup>): 403.1451, found: 403.1447.

**ethyl 4-cyano-3-(4-methoxyphenyl)-3,4-dihydro-2H-benzo[b][1,4]thiazine-7-carboxylate (3ad)**

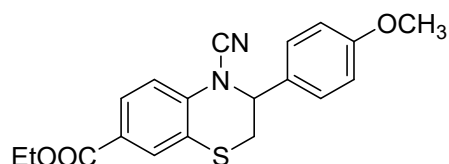

With general procedure 2.1, reaction of **1a** (0.1 mmol) and **2d** (0.3 mmol) provided the product **3ad** after flash column chromatography (1 vol % EtOAc in petroleum ether) as a colorless solid (28.4 mg, 80%). m.p. 146.7-167.5 °C. <sup>1</sup>H NMR (400 MHz, CDCl<sub>3</sub>) δ 7.89 (d, *J* = 2.0 Hz, 1H), 7.83 (dd, *J* = 9.2, 1.9 Hz, 1H), 7.42 (d, *J* = 8.6 Hz, 1H), 7.25 (dd, *J* = 9.0, 2.4 Hz, 2H), 6.95 – 6.92 (m, 2H), 5.14 (dd, *J* = 7.2, 3.6 Hz, 1H), 4.36 (q, *J* = 7.1 Hz, 2H), 3.81 (s, 3H), 3.24 – 3.16 (m, 2H), 1.39 (t, *J* = 7.1 Hz, 3H)., <sup>13</sup>C NMR (100 MHz, CDCl<sub>3</sub>) δ 165.4, 160.5, 138.5, 130.2, 129.0, 128.3, 128.0, 125.8, 120.6, 117.3, 114.6, 111.3,



62.6, 61.2, 55.4, 32.0, 14.3. HRMS (ESI-TOF): calcd. for  $C_{19}H_{18}N_2NaO_3S([M+Na]^+)$ : 377.0930, found: 377.0939.

**ethyl 3-(4-acetoxyphenyl)-4-cyano-3,4-dihydro-2H-benzo[b][1,4]thiazine-7-carboxylate (3ae)**

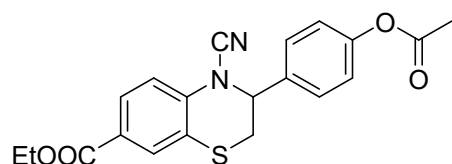

With general procedure 2.1, reaction of **1a** (0.1 mmol) and **2e** (0.3 mmol) provided the product **3ae** after flash column chromatography (1 vol % EtOAc in petroleum ether) as a colorless solid (29.1 mg, 76%). m.p. 168.9-171.1 °C.  $^1H$  NMR (400 MHz,  $CDCl_3$ )  $\delta$  7.92 – 7.83 (m, 2H), 7.44 (dd,  $J = 8.5, 1.4$  Hz, 1H), 7.32 (d,  $J = 8.5$  Hz, 2H), 7.16 (d,  $J = 7.5$  Hz, 2H), 5.26 (dd,  $J = 6.8, 3.4$  Hz, 1H), 4.37 (qd,  $J = 7.1, 0.9$  Hz, 2H), 3.31 (ddd,  $J = 12.9, 3.9, 1.8$  Hz, 1H), 3.15 (dd,  $J = 14.4, 6.1$  Hz, 1H), 2.30 (d,  $J = 1.2$  Hz, 3H), 1.39 (td,  $J = 7.1, 0.9$  Hz, 3H).,  $^{13}C$  NMR (100 MHz,  $CDCl_3$ )  $\delta$  169.2, 165.3, 151.4, 138.1, 134.6, 130.3, 128.2, 128.0, 126.0, 122.4, 120.6, 117.2, 111.3, 62.4, 61.2, 31.9, 21.1, 14.3. HRMS (ESI-TOF): calcd. for  $C_{20}H_{18}N_2NaO_4S([M+Na]^+)$ : 405.0879, found: 405.0873.

**ethyl 4-cyano-3-(2,5-dimethylphenyl)-3,4-dihydro-2H-benzo[b][1,4]thiazine-7-carboxylate (3af)**

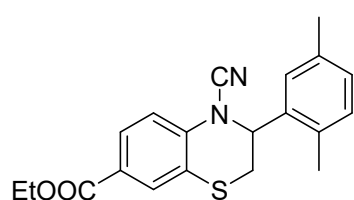

With general procedure 2.1, reaction of **1a** (0.1 mmol) and **2f** (0.3 mmol) provided the product **3af** after flash column chromatography (1 vol % EtOAc in petroleum ether) as a colorless solid (27.2 mg, 77%). m.p. 132.4-133.8 °C.  $^1H$  NMR (400 MHz,  $CDCl_3$ )  $\delta$  7.93 (d,  $J = 1.9$  Hz, 1H), 7.86 (dd,  $J = 8.6, 2.0$  Hz, 1H), 7.44 (d,  $J = 8.6$  Hz, 1H), 7.14 – 7.08 (m, 2H), 7.02 (s, 1H), 5.38 (dd,  $J = 6.6, 4.8$  Hz, 1H), 4.37 (q,  $J = 7.1$  Hz, 2H), 3.20 – 3.16 (m, 2H), 2.37 (s, 3H), 2.30 (s, 3H), 1.39 (t,  $J = 7.1$  Hz, 3H).  $^{13}C$  NMR (100 MHz,  $CDCl_3$ )  $\delta$  165.4, 139.0, 136.5, 134.7, 132.2, 131.3, 130.4, 130.2, 128.2, 127.3, 125.8, 120.8, 117.3, 111.3, 61.2, 60.3, 30.8, 21.2, 18.8, 14.4. HRMS (ESI-TOF): calcd. for  $C_{20}H_{20}N_2NaO_2S([M+Na]^+)$ : 375.1138, found: 375.1135.

**ethyl 3-([1,1'-biphenyl]-4-yl)-4-cyano-3,4-dihydro-2H-benzo[b][1,4]thiazine-7-carboxylate (3ag)**

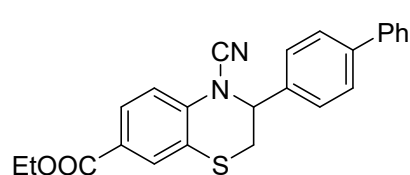

With general procedure 2.1, reaction of **1a** (0.1 mmol) and **2g** (0.3 mmol) provided the product **3ag** after flash column chromatography (1 vol % EtOAc in petroleum ether) as a colorless solid (25.9 mg,

65%). m.p. 169.3-170.1 °C. <sup>1</sup>H NMR (400 MHz, CDCl<sub>3</sub>) δ 7.94 – 7.84 (m, 2H), 7.66 – 7.60 (m, 2H), 7.60 – 7.54 (m, 2H), 7.49 – 7.42 (m, 3H), 7.39 – 7.33 (m, 3H), 5.29 (dd, *J* = 6.9, 3.4 Hz, 1H), 4.37 (q, *J* = 7.1 Hz, 2H), 3.33 (dd, *J* = 13.6, 3.4 Hz, 1H), 3.21 (dd, *J* = 13.7, 7.0 Hz, 1H), 1.39 (t, *J* = 7.1 Hz, 3H)., <sup>13</sup>C NMR (100 MHz, CDCl<sub>3</sub>) δ 165.4, 142.4, 140.1, 138.3, 136.0, 130.4, 128.9, 128.2, 127.9, 127.8, 127.3, 127.2, 125.9, 120.6, 117.2, 111.5, 62.7, 61.3, 32.0, 14.4. HRMS (ESI-TOF): calcd. for C<sub>24</sub>H<sub>20</sub>N<sub>2</sub>NaO<sub>2</sub>S([M+Na]<sup>+</sup>): 423.1138, found: 423.1144.

**ethyl 3-(4-bromophenyl)-4-cyano-3,4-dihydro-2H-benzo[b][1,4]thiazine-7-carboxylate (3ah)**

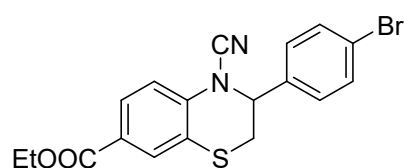

With general procedure 2.1, reaction of **1a** (0.1 mmol) and **2h** (0.3 mmol) provided the product **3ah** after flash column chromatography (1 vol % EtOAc in petroleum ether) as a colorless solid (29.4 mg, 73%). m.p. 144.2-145.8 °C. <sup>1</sup>H NMR (400 MHz, CDCl<sub>3</sub>) δ 7.93 – 7.81 (m, 2H), 7.59 – 7.51 (m, 2H), 7.43 (d, *J* = 8.6 Hz, 1H), 7.21 – 7.15 (m, 2H), 5.24 (dd, *J* = 6.6, 3.4 Hz, 1H), 4.36 (q, *J* = 7.1 Hz, 2H), 3.31 (dd, *J* = 13.7, 3.4 Hz, 1H), 3.13 (dd, *J* = 13.7, 6.6 Hz, 1H), 1.39 (t, *J* = 7.1 Hz, 3H)., <sup>13</sup>C NMR (100 MHz, CDCl<sub>3</sub>) δ 165.3, 137.9, 136.2, 132.4, 130.4, 128.5, 128.3, 126.1, 123.6, 120.4, 117.2, 111.2, 62.3, 61.3, 31.8, 14.3. HRMS (ESI-TOF): calcd. for C<sub>18</sub>H<sub>15</sub>BrN<sub>2</sub>NaO<sub>2</sub>S([M+Na]<sup>+</sup>): 424.9930, found: 424.9935.

**ethyl 3-(4-chlorophenyl)-4-cyano-3,4-dihydro-2H-benzo[b][1,4]thiazine-7-carboxylate (3ai)**

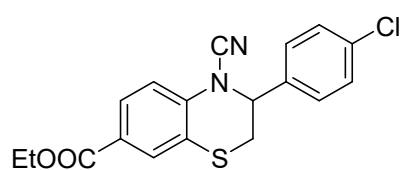

With general procedure 2.1, reaction of **1a** (0.1 mmol) and **2i** (0.3 mmol) provided the product **3ai** after flash column chromatography (1 vol % EtOAc in petroleum ether) as a colorless oil (18.3 mg, 51%). <sup>1</sup>H NMR (400 MHz, CDCl<sub>3</sub>) δ 7.91 – 7.83 (m, 2H), 7.47 – 7.36 (m, 3H), 7.28 – 7.21 (m, 2H), 5.25 (dd, *J* = 6.7, 3.4 Hz, 1H), 4.36 (q, *J* = 7.1 Hz, 2H), 3.31 (dd, *J* = 13.7, 3.4 Hz, 1H), 3.14 (dd, *J* = 13.7, 6.7 Hz, 1H), 1.39 (t, *J* = 7.1 Hz, 3H)., <sup>13</sup>C NMR (100 MHz, CDCl<sub>3</sub>) δ 165.3, 137.9, 135.7, 135.5, 130.4, 129.5, 128.3, 128.2, 126.1, 120.4, 117.2, 111.2, 62.3, 61.3, 31.8, 14.3. HRMS (ESI-TOF): calcd. for C<sub>18</sub>H<sub>15</sub>ClN<sub>2</sub>NaO<sub>2</sub>S([M+Na]<sup>+</sup>): 381.0435, found: 381.0436.

**ethyl 3-(2-bromophenyl)-4-cyano-3,4-dihydro-2H-benzo[b][1,4]thiazine-7-carboxylate (3aj)**

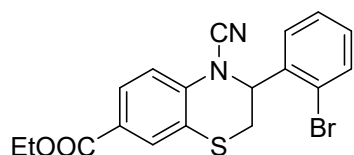

With general procedure 2.1, reaction of **1a** (0.1 mmol) and **2j** (0.3 mmol) provided the product **3aj** after flash column chromatography (1 vol % EtOAc in petroleum ether) as a colorless oil (20.2 mg, 50%). <sup>1</sup>H NMR (400 MHz, CDCl<sub>3</sub>) δ 7.96 – 7.86 (m, 2H), 7.63 (dd, *J* = 7.9, 1.3 Hz, 1H), 7.49 (d, *J* = 8.5 Hz, 1H), 7.34 (td, *J* = 7.5, 1.3 Hz, 1H), 7.28 – 7.23 (m, 1H), 7.19 (dd, *J* = 7.7, 1.7 Hz, 1H), 5.77 – 5.72 (m, 1H), 4.37 (q, *J* = 7.1 Hz, 2H), 3.35 (dd, *J* = 13.8, 3.7 Hz, 1H), 3.26 (dd, *J* = 13.8, 5.1 Hz, 1H), 1.39 (t, *J* = 7.1 Hz, 3H). <sup>13</sup>C NMR (100 MHz, CDCl<sub>3</sub>) δ 165.3, 138.1, 136.2, 133.6, 130.7, 130.6, 128.5, 128.5, 128.0, 126.0, 121.9, 120.5, 116.9, 111.3, 62.4, 61.3, 29.9, 14.4. HRMS (ESI-TOF): calcd. for C<sub>18</sub>H<sub>15</sub>BrN<sub>2</sub>NaO<sub>2</sub>S([M+Na]<sup>+</sup>): 424.9930, found: 424.9905.

**ethyl 3-(2-chlorophenyl)-4-cyano-3,4-dihydro-2H-benzo[b][1,4]thiazine-7-carboxylate (3ak)**

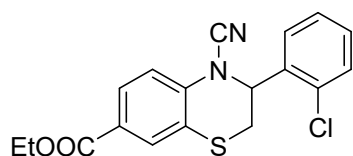

With general procedure 2.1, reaction of **1a** (0.1 mmol) and **2k** (0.3 mmol) provided the product **3ak** after flash column chromatography (1 vol % EtOAc in petroleum ether) as a colorless solid (23.3mg, 65%). m.p. 131.8-132.7 °C. <sup>1</sup>H NMR (400 MHz, CDCl<sub>3</sub>) δ 7.98 – 7.83 (m, 2H), 7.46 (dd, *J* = 16.7, 8.2 Hz, 2H), 7.35 – 7.27 (m, 2H), 7.20 (dd, *J* = 7.6, 1.9 Hz, 1H), 5.78 (t, *J* = 4.4 Hz, 1H), 4.37 (q, *J* = 7.1 Hz, 2H), 3.35 (dd, *J* = 13.8, 4.4 Hz, 1H), 3.25 (dd, *J* = 13.8, 5.2 Hz, 1H), 1.39 (t, *J* = 7.1 Hz, 3H)., <sup>13</sup>C NMR (100 MHz, CDCl<sub>3</sub>) δ 165.3, 138.0, 134.7, 131.9, 130.6, 130.4, 130.3, 128.4, 128.4, 127.4, 126.0, 120.5, 116.9, 111.3, 61.3, 60.2, 29.7, 14.4. HRMS (ESI-TOF): calcd. for C<sub>18</sub>H<sub>15</sub>ClN<sub>2</sub>NaO<sub>2</sub>S([M+Na]<sup>+</sup>): 381.0435, found: 381.0431.

**ethyl 4-cyano-3-(3-fluorophenyl)-3,4-dihydro-2H-benzo[b][1,4]thiazine-7-carboxylate (3al)**

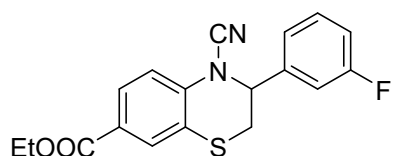

With general procedure 2.1, reaction of **1a** (0.1 mmol) and **2l** (0.3 mmol) provided the product **3al** after flash column chromatography (1 vol % EtOAc in petroleum ether) as a colorless solid (13.1 mg, 38%). m.p. 167.6-168.4 °C. <sup>1</sup>H NMR (400 MHz, CDCl<sub>3</sub>) δ 7.92 – 7.84 (m, 2H), 7.48 – 7.36 (m, 2H), 7.10 (dq, *J* = 8.2, 5.0, 3.7 Hz, 2H), 7.01 (dt, *J* = 9.3, 2.2 Hz, 1H), 5.28 (dd, *J* = 6.5, 3.5 Hz, 1H), 4.37 (q, *J* = 7.1 Hz, 2H), 3.34 (dd, *J* = 13.7, 3.5 Hz, 1H), 3.16 (dd, *J* = 13.7, 6.4 Hz, 1H), 1.39 (t, *J* = 7.1 Hz, 3H)., <sup>13</sup>C NMR (100 MHz, CDCl<sub>3</sub>) δ 165.3, 163.0 (d, *J*<sub>C-F</sub> = 248.1 Hz), 139.6 (d, *J*<sub>C-F</sub> = 6.6 Hz), 137.8, 131.0 (d, *J*<sub>C-F</sub> = 8.1 Hz), 130.4, 128.3, 126.1, 122.4 (d, *J*<sub>C-F</sub> = 2.9 Hz), 120.5, 117.2, 116.5 (d, *J*<sub>C-F</sub> = 21.1 Hz), 113.9 (d, *J*<sub>C-F</sub> =

23.1 Hz), 111.3, 62.3 (d,  $J_{C-F} = 2.0$  Hz), 61.3, 31.7, 14.3.  $^{19}\text{F}$  NMR (376 MHz,  $\text{CDCl}_3$ )  $\delta$  -110.9 (s, 1F). HRMS (ESI-TOF): calcd. for  $\text{C}_{18}\text{H}_{15}\text{FN}_2\text{NaO}_2\text{S}([\text{M}+\text{Na}]^+)$ : 365.0730, found: 365.0758.

**ethyl 4-cyano-3-(naphthalen-2-yl)-3,4-dihydro-2H-benzo[b][1,4]thiazine-7-carboxylate (3am)**

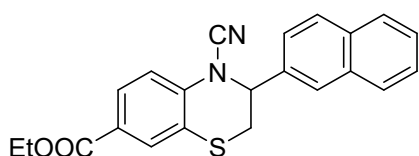

With general procedure 2.1, reaction of **1a** (0.1 mmol) and **2m** (0.3 mmol) provided the product **3am** after flash column chromatography (1 vol % EtOAc in petroleum ether) as a colorless solid (27.3 mg, 73%). m.p. 146.9-147.4 °C.  $^1\text{H}$  NMR (400 MHz,  $\text{CDCl}_3$ )  $\delta$  7.93 – 7.78 (m, 5H), 7.74 (s, 1H), 7.53 – 7.45 (m, 3H), 7.36 (dd,  $J = 8.5, 1.9$  Hz, 1H), 5.37 (dd,  $J = 6.9, 3.7$  Hz, 1H), 4.36 (q,  $J = 7.1$  Hz, 2H), 3.34 – 3.22 (m, 2H), 1.38 (t,  $J = 7.2$  Hz, 3H).  $^{13}\text{C}$  NMR (100 MHz,  $\text{CDCl}_3$ )  $\delta$  165.4, 138.4, 134.4, 133.6, 133.1, 130.4, 129.4, 128.3, 128.2, 127.9, 127.0, 126.9, 126.8, 125.9, 123.5, 120.7, 117.3, 111.5, 63.2, 61.3, 32.0, 14.3. HRMS (ESI-TOF): calcd. for  $\text{C}_{22}\text{H}_{18}\text{N}_2\text{NaO}_2\text{S}([\text{M}+\text{Na}]^+)$ : 397.0981, found: 397.1006.

**ethyl 4-cyano-3-(thiophen-2-yl)-3,4-dihydro-2H-benzo[b][1,4]thiazine-7-carboxylate (3an)**

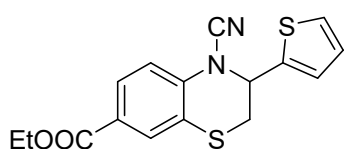

With general procedure 2.1, reaction of **1a** (0.1 mmol) and **2n** (0.3 mmol) provided the product **3an** after flash column chromatography (1 vol % EtOAc in petroleum ether) as a yellow solid (23.2 mg, 70%). m.p. 91.2-92.8 °C.  $^1\text{H}$  NMR (400 MHz,  $\text{CDCl}_3$ )  $\delta$  7.89 (d,  $J = 1.9$  Hz, 1H), 7.82 (dd,  $J = 8.6, 2.0$  Hz, 1H), 7.42 – 7.34 (m, 2H), 7.20 – 7.14 (m, 1H), 7.03 (dd,  $J = 5.1, 3.6$  Hz, 1H), 5.52 (dd,  $J = 6.4, 3.4$  Hz, 1H), 4.36 (q,  $J = 7.1$  Hz, 2H), 3.43 (dd,  $J = 13.6, 3.4$  Hz, 1H), 3.26 (dd,  $J = 13.6, 6.4$  Hz, 1H), 1.38 (t,  $J = 7.1$  Hz, 3H).  $^{13}\text{C}$  NMR (100 MHz,  $\text{CDCl}_3$ )  $\delta$  165.3, 139.0, 137.3, 130.0, 128.1, 128.0, 127.4, 127.0, 126.0, 120.3, 117.4, 111.1, 61.3, 58.2, 31.8, 14.4. HRMS (ESI-TOF): calcd. for  $\text{C}_{16}\text{H}_{14}\text{N}_2\text{NaO}_2\text{S}_2([\text{M}+\text{Na}]^+)$ : 353.0389, found: 353.0411.

**ethyl 4-cyano-3-methyl-3-phenyl-3,4-dihydro-2H-benzo[b][1,4]thiazine-7-carboxylate (3ao)**

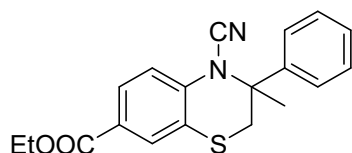

With general procedure 2.1, reaction of **1a** (0.1 mmol) and **2o** (0.3 mmol) provided the product **3ao** after flash column chromatography (1 vol % EtOAc in petroleum

ether) as a colorless solid (31.3 mg, 92%). m.p. 131.3-132.5 °C. <sup>1</sup>H NMR (400 MHz, CDCl<sub>3</sub>) δ 7.91 – 7.76 (m, 2H), 7.52 (d, *J* = 8.7 Hz, 1H), 7.39 – 7.28 (m, 5H), 4.34 (q, *J* = 7.1 Hz, 2H), 3.30 (d, *J* = 13.8 Hz, 1H), 3.18 (d, *J* = 13.6 Hz, 1H), 2.05 (s, 3H), 1.36 (t, *J* = 7.1 Hz, 3H). <sup>13</sup>C NMR (100 MHz, CDCl<sub>3</sub>) δ 165.3, 141.2, 138.4, 130.0, 129.1, 128.5, 127.8, 125.8, 125.3, 120.9, 117.7, 110.6, 63.3, 61.2, 38.1, 27.9, 14.4. HRMS (ESI-TOF): calcd. for C<sub>19</sub>H<sub>18</sub>N<sub>2</sub>NaO<sub>2</sub>S([M+Na]<sup>+</sup>): 361.0981, found: 361.1000.

**ethyl 4-cyano-3-ethoxy-3,4-dihydro-2H-benzo[b][1,4]thiazine-7-carboxylate (3ap)**

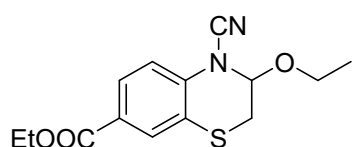

With general procedure 2.1, reaction of **1a** (0.1 mmol) and **2p** (0.3 mmol) provided the product **3ap** after flash column chromatography (1 vol % EtOAc in petroleum ether) as a colorless oil (16.1 mg, 55%). <sup>1</sup>H NMR (400 MHz, CDCl<sub>3</sub>) δ 7.86 (d, *J* = 1.9 Hz, 1H), 7.81 (dd, *J* = 8.6, 1.9 Hz, 1H), 7.34 (d, *J* = 8.5 Hz, 1H), 5.38 (dd, *J* = 3.9, 2.3 Hz, 1H), 4.36 (q, *J* = 7.1 Hz, 2H), 3.97 (dq, *J* = 9.4, 7.0 Hz, 1H), 3.86 – 3.79 (m, 1H), 3.27 (dd, *J* = 13.3, 2.3 Hz, 1H), 3.11 (dd, *J* = 13.3, 3.9 Hz, 1H), 1.38 (t, *J* = 7.1 Hz, 3H), 1.29 (t, *J* = 7.0 Hz, 3H). <sup>13</sup>C NMR (100 MHz, CDCl<sub>3</sub>) δ 165.3, 135.5, 129.5, 127.5, 126.4, 120.6, 117.5, 111.8, 84.3, 65.4, 61.2, 29.9, 14.9, 14.3. HRMS (ESI-TOF): calcd. For C<sub>14</sub>H<sub>16</sub>N<sub>2</sub>NaO<sub>3</sub>S([M+Na]<sup>+</sup>): 315.0774, found: 315.0778.

**ethyl 3-(tert-butoxy)-4-cyano-3,4-dihydro-2H-benzo[b][1,4]thiazine-7-carboxylate (3aq)**

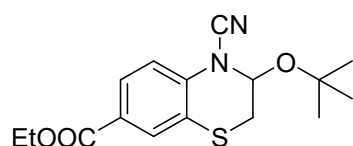

With general procedure 2.1, reaction of **1a** (0.1 mmol) and **2q** (0.3 mmol) provided the product **3aq** after flash column chromatography (1 vol % EtOAc in petroleum ether) as a colorless solid (9.9 mg, 31%). m.p. 87.3-88.2 °C. <sup>1</sup>H NMR (400 MHz, CD<sub>2</sub>Cl<sub>2</sub>) δ 7.84 (d, *J* = 2.0 Hz, 1H), 7.77 (dd, *J* = 8.6, 2.0 Hz, 1H), 7.27 (d, *J* = 8.6 Hz, 1H), 5.47 (dd, *J* = 5.3, 2.4 Hz, 1H), 4.31 (t, *J* = 7.1 Hz, 2H), 3.23 (dd, *J* = 13.0, 2.4 Hz, 1H), 2.96 (dd, *J* = 13.1, 5.2 Hz, 1H), 1.36 (d, *J* = 2.4 Hz, 12H). <sup>13</sup>C NMR (100 MHz, CD<sub>2</sub>Cl<sub>2</sub>) δ 165.2, 136.8, 129.1, 127.2, 126.1, 120.8, 117.8, 111.0, 79.0, 76.8, 61.1, 32.1, 28.1, 14.1. HRMS (ESI-TOF): calcd. For C<sub>16</sub>H<sub>20</sub>N<sub>2</sub>NaO<sub>3</sub>S([M+Na]<sup>+</sup>): 343.1087, found: 343.1086.

**ethyl 4-cyano-3-(phenylthio)-3,4-dihydro-2H-benzo[b][1,4]thiazine-7-carboxylate (3ar)**

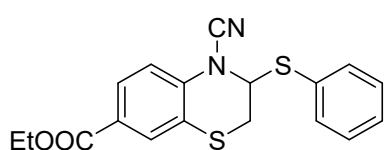

With general procedure 2.1, reaction of **1a** (0.1 mmol) and **2r** (0.3 mmol) provided the product **3ar** after flash column chromatography (1 vol % EtOAc in petroleum ether) as a yellow oil (24.2 mg, 68%). <sup>1</sup>H NMR (400 MHz, CDCl<sub>3</sub>) δ 7.89 – 7.78 (m, 2H), 7.62 – 7.56 (m, 2H), 7.43 – 7.35 (m, 3H), 7.29 (d,

$J = 8.5$  Hz, 1H), 5.42 (dd,  $J = 5.2, 3.2$  Hz, 1H), 4.36 (q,  $J = 7.1$  Hz, 2H), 3.56 (dd,  $J = 13.4, 3.2$  Hz, 1H), 3.20 (dd,  $J = 13.5, 5.2$  Hz, 1H), 1.38 (t,  $J = 7.1$  Hz, 3H).  $^{13}\text{C}$  NMR (100 MHz,  $\text{CDCl}_3$ )  $\delta$  165.2, 136.0, 135.4, 130.0, 130.0, 129.8, 129.7, 127.9, 126.6, 120.8, 118.1, 110.7, 67.7, 61.3, 31.4, 14.3. HRMS (ESI-TOF): calcd. For  $\text{C}_{18}\text{H}_{16}\text{N}_2\text{NaO}_2\text{S}_2([\text{M}+\text{Na}]^+)$ : 379.0545, found: 379.0540.

**ethyl 4-cyano-2-methyl-3-phenyl-3,4-dihydro-2H-benzo[b][1,4]thiazine-7-carboxylate (3as)**

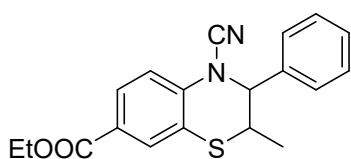

With general procedure 2.1, reaction of **1a** (0.1 mmol) and **2s** (0.3 mmol) provided the product **3as** after flash column chromatography (1 vol % EtOAc in petroleum ether) as a yellow oil (31.2 mg, 92%).  $^1\text{H}$  NMR (400 MHz,  $\text{CDCl}_3$ )  $\delta$  7.91 – 7.83 (m, 2.0H, single isomer), 7.51 – 7.33 (m, 4.3H, three isomers), 7.26 (dq,  $J = 5.0, 2.3$  Hz, 2.1H, two isomers), 5.14 (d,  $J = 3.6$  Hz, 0.5H, single isomer), 4.83 (d,  $J = 6.8$  Hz, 1.0H, single isomer), 4.36 (q,  $J = 7.1$  Hz, 2.1H, two isomers), 3.67 (p,  $J = 3.6$  Hz, 0.5H, single isomer), 3.36 (p,  $J = 6.8$  Hz, 1.0H, single isomer), 1.38 (m,  $J = 7.1$  Hz, 3.2H, two isomers), 1.33 (d,  $J = 6.8$  Hz, 3.0H, single isomer), 1.18 (d,  $J = 7.0$  Hz, 0.2H, single isomer).  $^{13}\text{C}$  NMR (100 MHz,  $\text{CDCl}_3$ ), major product:  $\delta$  165.4, 138.0, 136.9, 130.3, 129.5, 129.2, 128.0, 127.1, 126.1, 120.4, 116.9, 111.7, 69.1, 61.2, 39.1, 19.3, 14.4. HRMS (ESI-TOF): calcd. For  $\text{C}_{19}\text{H}_{18}\text{N}_2\text{NaO}_2\text{S}([\text{M}+\text{Na}]^+)$ : 361.0981, found: 361.0992.

**ethyl 4-cyano-2,3-diphenyl-3,4-dihydro-2H-benzo[b][1,4]thiazine-7-carboxylate (3at)**

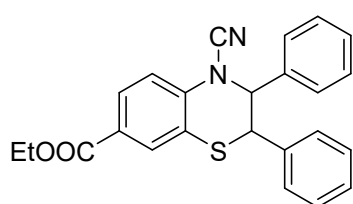

With general procedure 2.1, reaction of **1a** (0.1 mmol) and **2t** (0.3 mmol) provided the product **3at** after flash column chromatography (1 vol % EtOAc in petroleum ether) as a yellow oil (20.0 mg, 50%).  $^1\text{H}$  NMR (400 MHz,  $\text{CDCl}_3$ )  $\delta$  7.96 (d,  $J = 1.9$  Hz, 1H), 7.89 (dd,  $J = 8.6, 2.0$  Hz, 1H), 7.49 (d,  $J = 8.6$  Hz, 1H), 7.28 (dd,  $J = 5.0, 1.8$  Hz, 3H), 7.23 (dd,  $J = 5.0, 1.8$  Hz, 3H), 7.14 (dd,  $J = 6.7, 2.7$  Hz, 4H), 5.20 (d,  $J = 8.4$  Hz, 1H), 4.37 (q,  $J = 7.1$  Hz, 2H), 4.32 (d,  $J = 8.4$  Hz, 1H), 1.39 (t,  $J = 7.1$  Hz, 3H).  $^{13}\text{C}$  NMR (100 MHz,  $\text{CDCl}_3$ )  $\delta$  165.4, 138.9, 136.3, 135.8, 130.0, 129.5, 129.0, 128.6, 128.3, 128.2, 127.5, 126.1, 122.4, 117.4, 111.3, 77.4, 77.1, 76.8, 69.5, 61.3, 49.4, 14.4. HRMS (ESI-TOF): calcd. For  $\text{C}_{24}\text{H}_{21}\text{N}_2\text{O}_2\text{S}([\text{M}+\text{H}]^+)$ : 401.1318, found: 401.1332.

**ethyl 9-cyano-3,3a,9,9a-tetrahydro-2H-benzo[b]furo[2,3-e][1,4]thiazine-6-carboxylate (3au)**

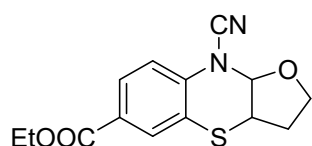

With general procedure 2.1, reaction of **1a** (0.1 mmol) and **2u** (0.3 mmol) provided the product **3au** after flash column chromatography (1 vol % EtOAc in petroleum ether) as a colorless solid (14.3 mg, 49%). m.p. 87.8-88.1 °C. <sup>1</sup>H NMR (400 MHz, CDCl<sub>3</sub>) δ 8.01 – 7.90 (m, 2H), 7.39 (d, *J* = 8.5 Hz, 1H), 5.73 (d, *J* = 6.3 Hz, 1H), 4.37 (q, *J* = 7.1 Hz, 2H), 4.11 – 3.98 (m, 2H), 3.82 (td, *J* = 8.9, 6.2 Hz, 1H), 2.40 (dtd, *J* = 13.3, 7.7, 5.1 Hz, 1H), 1.90 – 1.84 (m, 1H), 1.39 (t, *J* = 7.1 Hz, 3H). <sup>13</sup>C NMR (100 MHz, CDCl<sub>3</sub>) δ 165.2, 139.8, 131.3, 129.3, 127.0, 120.2, 117.8, 111.0, 91.0, 68.4, 61.3, 41.7, 30.3, 14.3. HRMS (ESI-TOF): calcd. For C<sub>14</sub>H<sub>14</sub>N<sub>2</sub>NaO<sub>3</sub>S([M+Na]<sup>+</sup>): 313.0617, found: 313.0618.

**ethyl 10-cyano-4b,10,10a,11-tetrahydrobenzo[b]indeno[2,1-e][1,4]thiazine-7-carboxylate (3av)**

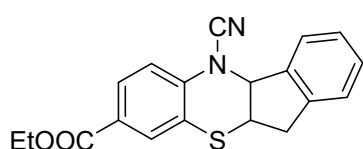

With general procedure 2.1, reaction of **1a** (0.1 mmol) and **2v** (0.3 mmol) provided the product **3av** after flash column chromatography (1 vol % EtOAc in petroleum ether) as a colorless solid (28.6mg, 85%). m.p. 112.6-113.0 °C. <sup>1</sup>H NMR (400 MHz, CDCl<sub>3</sub>) δ 7.88 (d, *J* = 2.0 Hz, 1H), 7.79 (dd, *J* = 8.5, 2.0 Hz, 1H), 7.66 – 7.57 (m, 1H), 7.36 – 7.17 (m, 4H), 5.37 (d, *J* = 6.3 Hz, 1H), 4.33 (q, *J* = 7.1 Hz, 2H), 4.16 (q, *J* = 6.4 Hz, 1H), 3.30 (dd, *J* = 16.4, 6.9 Hz, 1H), 2.98 (dd, *J* = 16.4, 6.1 Hz, 1H), 1.36 (t, *J* = 7.1 Hz, 3H). <sup>13</sup>C NMR (100 MHz, CDCl<sub>3</sub>) δ 165.3, 140.7, 139.6, 138.7, 130.7, 130.1, 128.3, 127.7, 126.5, 125.4, 125.2, 122.0, 117.8, 112.3, 67.2, 61.2, 43.3, 38.2, 14.3. HRMS (ESI-TOF): calcd. For C<sub>19</sub>H<sub>16</sub>N<sub>2</sub>NaO<sub>2</sub>S([M+Na]<sup>+</sup>): 359.0825, found: 359.0848.

**N,N-dimethylbenzo[d]thiazol-2-amine (1p)**

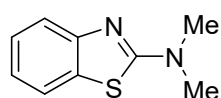

With general procedure 4.2, reaction of Benzothiazole (0.5 mmol) and DMF (40 equiv) provided the product **1p** after flash column chromatography (10 vol % EtOAc in petroleum ether) as a yellow solid (40 mg, 45%). m.p. 84.3-85.1 °C. <sup>1</sup>H NMR (400 MHz, CDCl<sub>3</sub>) δ 7.49 (td, *J* = 7.3, 6.7, 1.2 Hz, 2H), 7.23 – 7.16 (m, 1H), 6.96 (td, *J* = 7.6, 1.2 Hz, 1H), 3.10 (s, 6H). <sup>13</sup>C NMR (101 MHz, CDCl<sub>3</sub>) δ 168.8, 153.3, 131.2, 125.9, 120.9, 120.6, 118.8, 40.2. HRMS (ESI-TOF): calcd. For C<sub>9</sub>H<sub>11</sub>N<sub>2</sub>S([M+H]<sup>+</sup>): 179.0637, found: 179.0635.

**ethyl 4-cyano-3-phenyl-3,4-dihydro-2H-benzo[b][1,4]thiazine-7-carboxylate 1,1-dioxide (4aa)**

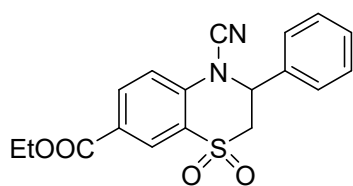

With general procedure 5, reaction of **3aa** (0.1 mmol) and *m*-CPBA (0.3 mmol) provided the product **4aa** after flash column chromatography (20 vol % EtOAc in petroleum ether) as a white solid (33.5 mg, 94%). m.p. 142.1-143.5 °C. <sup>1</sup>H NMR (400 MHz, CDCl<sub>3</sub>) δ 8.62 (d, *J* = 2.0 Hz, 1H), 8.25 (dd, *J* = 8.8, 2.0 Hz, 1H), 7.55 – 7.46 (m, 6H), 5.53 (dd, *J* = 12.7, 2.6 Hz, 1H), 4.41 (q, *J* = 7.1 Hz, 2H), 3.83 (dd, *J* = 14.4, 12.7 Hz, 1H), 3.58 (dd, *J* = 14.3, 2.6 Hz, 1H), 1.42 (t, *J* = 7.1 Hz, 3H). <sup>13</sup>C NMR (101 MHz, CDCl<sub>3</sub>) δ 164.1, 139.7, 135.8, 133.4, 131.2, 129.9, 128.0, 126.7, 126.6, 126.4, 117.8, 108.5, 62.0, 61.9, 53.4, 14.3. HRMS (ESI-TOF): calcd. For C<sub>18</sub>H<sub>16</sub>N<sub>2</sub>NaO<sub>4</sub>S([M+Na]<sup>+</sup>): 379.0723, found: 379.0754.

#### ethyl 4-carbamoyl-3-phenyl-3,4-dihydro-2H-benzo[b][1,4]thiazine-7-carboxylate (**5aa**)

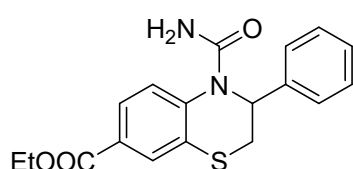

With general procedure 6, reaction of **3aa** (0.2 mmol), trifluoroacetic acid (0.8 mmol) and H<sub>2</sub>O (1.6 mmol) provided the product **5aa** after flash column chromatography (50 vol % EtOAc in petroleum ether) as a colorless oil (32.4 mg, 48%). <sup>1</sup>H NMR (400 MHz, CDCl<sub>3</sub>) δ 7.89 (d, *J* = 2.0 Hz, 1H), 7.77 (dd, *J* = 8.4, 2.0 Hz, 1H), 7.45 (d, *J* = 8.4 Hz, 1H), 7.34 – 7.30 (m, 2H), 7.27 – 7.23 (m, 2H), 7.21 – 7.16 (m, 1H), 6.13 (t, *J* = 5.9 Hz, 1H), 5.10 (s, 2H), 4.33 (q, *J* = 7.1 Hz, 2H), 3.60 (dd, *J* = 13.1, 5.9 Hz, 1H), 3.31 (dd, *J* = 13.1, 5.9 Hz, 1H), 1.36 (t, *J* = 7.1 Hz, 3H). <sup>13</sup>C NMR (101 MHz, CDCl<sub>3</sub>) δ 165.5, 156.5, 140.5, 138.9, 131.1, 129.9, 128.6, 127.7, 127.5, 127.0, 126.6, 126.5, 61.3, 55.0, 33.7, 14.3. HRMS (ESI-TOF): calcd. For C<sub>18</sub>H<sub>18</sub>N<sub>2</sub>NaO<sub>3</sub>S([M+Na]<sup>+</sup>): 365.0930, found: 365.0899.

## 8. X-ray Crystal Structures

### X-ray Crystal Structures for **3ba**

|                     |                                                    |
|---------------------|----------------------------------------------------|
| Identification code | <b>3ba</b>                                         |
| Empirical formula   | C <sub>15</sub> H <sub>11</sub> BrN <sub>2</sub> S |
| Formula weight      | 331.23                                             |
| Temperature/K       | 290.45                                             |
| Crystal system      | monoclinic                                         |
| Space group         | P2 <sub>1</sub> /n                                 |
| a/Å                 | 7.9320(3)                                          |



|                                             |                                                                |
|---------------------------------------------|----------------------------------------------------------------|
| b/Å                                         | 9.4729(4)                                                      |
| c/Å                                         | 17.8231(7)                                                     |
| $\alpha$ /°                                 | 90                                                             |
| $\beta$ /°                                  | 97.434(4)                                                      |
| $\gamma$ /°                                 | 90                                                             |
| Volume/Å <sup>3</sup>                       | 1327.95(9)                                                     |
| Z                                           | 25                                                             |
| $\rho_{\text{calc}}/\text{cm}^3$            | 10.355                                                         |
| $\mu/\text{mm}^{-1}$                        | 34.775                                                         |
| F(000)                                      | 4150.0                                                         |
| Crystal size/mm <sup>3</sup>                | 0.4500 × 0.4000 × 0.3000                                       |
| Radiation                                   | CuK $\alpha$ ( $\lambda$ = 1.54184)                            |
| 2 $\Theta$ range for data collection/°      | 10.01 to 155.15                                                |
| Index ranges                                | -9 ≤ h ≤ 10, -10 ≤ k ≤ 12, -22 ≤ l ≤ 22                        |
| Reflections collected                       | 8540                                                           |
| Independent reflections                     | 2809 [ $R_{\text{int}}$ = 0.0532, $R_{\text{sigma}}$ = 0.0398] |
| Data/restraints/parameters                  | 2809/0/216                                                     |
| Goodness-of-fit on F <sup>2</sup>           | 1.040                                                          |
| Final R indexes [ $I \geq 2\sigma(I)$ ]     | $R_1$ = 0.0553, $wR_2$ = 0.1393                                |
| Final R indexes [all data]                  | $R_1$ = 0.0607, $wR_2$ = 0.1476                                |
| Largest diff. peak/hole / e Å <sup>-3</sup> | 0.46/-0.74                                                     |

## 9. References

1. S. H. Cho, J. Y. Kim, S. Y. Lee and S. Chang, *Angew. Chem. Int. Ed.*, 2009, **48**, 9127-9130.
2. J. Li, X. Zheng, W. Li, W. Zhou, W. Zhu and Y. Zhang, *New J. Chem.*, 2016, **40**, 77-80.
3. (a) A. D. Becke, Density-Functional Thermochemistry. III. *J. Chem. Phys.*, 1993, **98**, 5648–5652; (b) C. Lee, W. Yang and R. G. Parr, *Phys. Rev. B.*, 1988, **37**, 785–789; (c) S. Grimme, J. Antony, S. Ehrlich and H. Krieg, *J. Chem. Phys.*, 2010, **132**, 154104–154118.
4. P. J. Hay and W. R. Wadt, *J. Chem. Phys.*, 1985, **82**, 299–310.
5. K. Fukui, *Acc. Chem. Res.*, 1981, **14**, 363–368.

6. A. V. Marenich, C. J. Cramer and D. G. Truhlar, *J. Phys. Chem. B*, 2009, **113**, 6378–6396.
7. (a) M. Dolg, U. Wedig, H. Stoll and H. Preuss, *J. Chem. Phys.*, 1987, **86**, 866–872; (b) D. Andrae, U. Häußermann, M. Dolg, H. Stoll and H. Preuss, *Theor. Chim. Acta.*, 1990, **77**, 123–141.
8. M. J. Frisch, G. W. Trucks, H. B. Schlegel, G. E. Scuseria, M. A. Robb, J. R. Cheeseman, G. Scalmani, V. Barone, B. Mennucci, G. A. Petersson, H. Nakatsuji, M. Caricato, X. Li, H. P. Hratchian, A. F. Izmaylov, J. Bloino, G. Zheng, J. L. Sonnenberg, M. Hada, M. Ehara, K. Toyota, R. Fukuda, J. Hasegawa, M. Ishida, T. Nakajima, Y. Honda, O. Kitao, H. Nakai, T. Vreven, J. A. Montgomery, J. E. Peralta, F. Ogliaro, M. Bearpark, J. J. Heyd, E. Brothers, K. N. Kudin, V. N. Staroverov, R. Kobayashi, J. Normand, K. Raghavachari, A. Rendell, J. C. Burant, S. S. Iyengar, J. M. Tomasi, N. Cossi, N. J. Rega, M. Millam, J. E. Klene, J. B. Knox, V. Cross, C. Bakken, Adamo, J. Jaramillo, R. Gomperts, R. E. Stratmann, O. Yazyev, A. J. Austin, R. Cammi, C. Pomelli, J. W. Ochterski, R. L. Martin, K. Morokuma, V. G. Zakrzewski, G. A. Voth, P. Salvador, J. J. Dannenberg, S. Dapprich, A. D. Daniels, O. Farkas, J. B. Foresman, J. V. Ortiz, J. Cioslowski, D. J. Fox, *Gaussian 09, Revision C.01*, Gaussian, Inc., Wallingford CT, 2010.
9. C. Y. Legault, CYLview, 1.0b; Université de Sherbrooke: Sherbrooke, Quebec, Canada, 2009.

## 10. NMR spectra

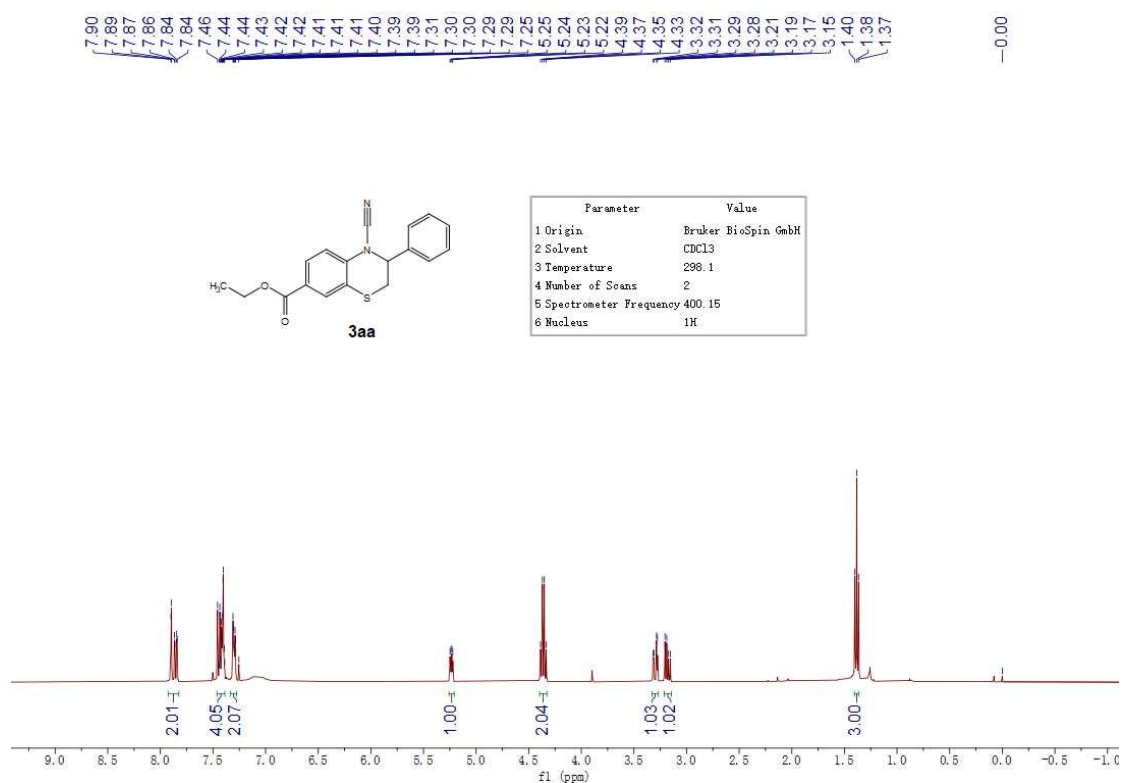

<sup>1</sup>H NMR spectrum of **3aa** (400 MHz, CDCl<sub>3</sub>)

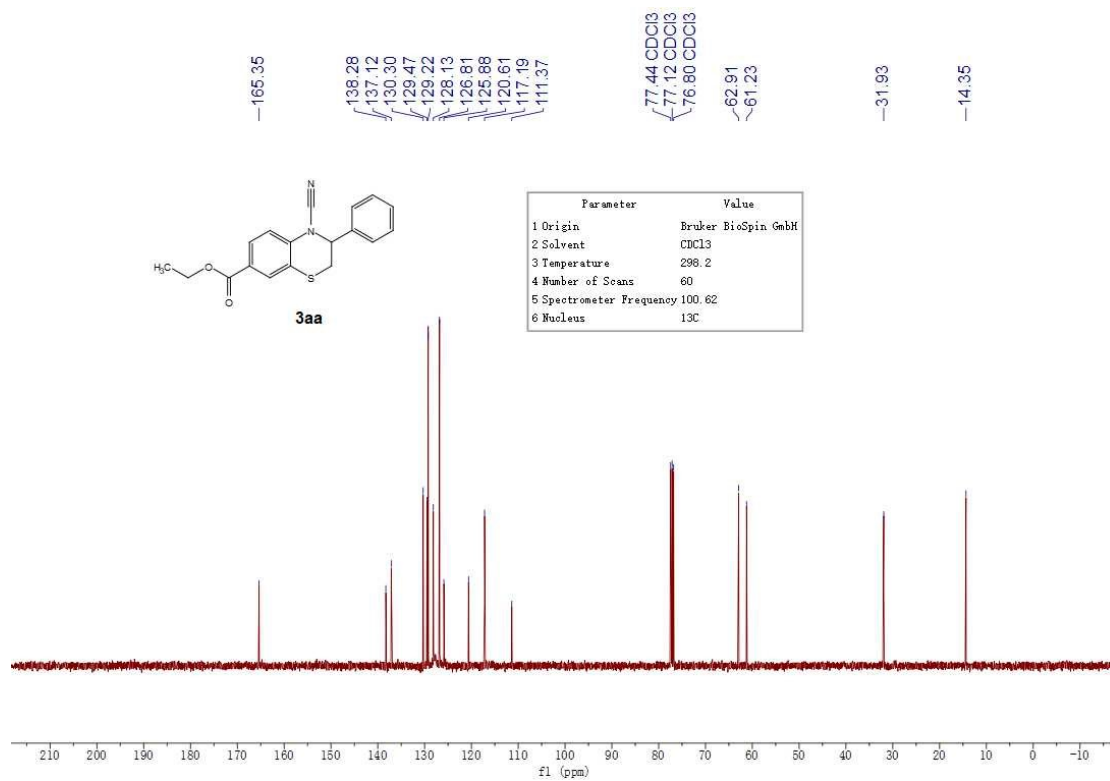

<sup>13</sup>C NMR spectrum of **3aa** (100 MHz, CDCl<sub>3</sub>)

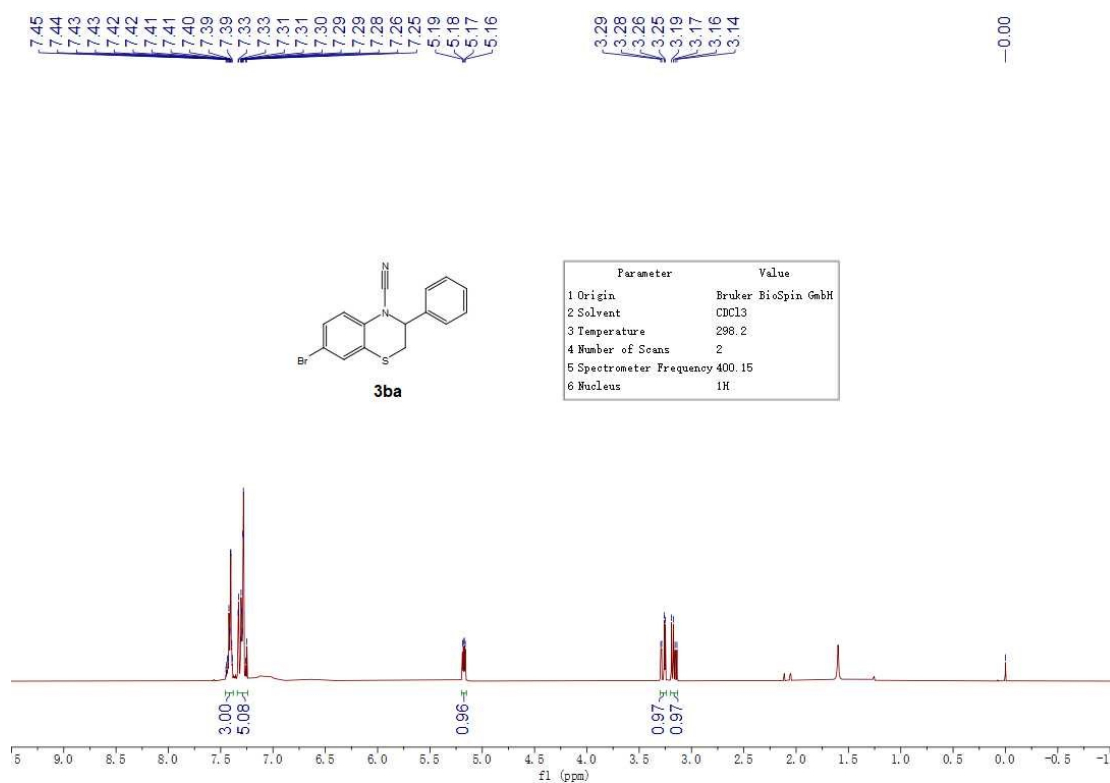

<sup>1</sup>H NMR spectrum of **3ba** (400 MHz, CDCl<sub>3</sub>)

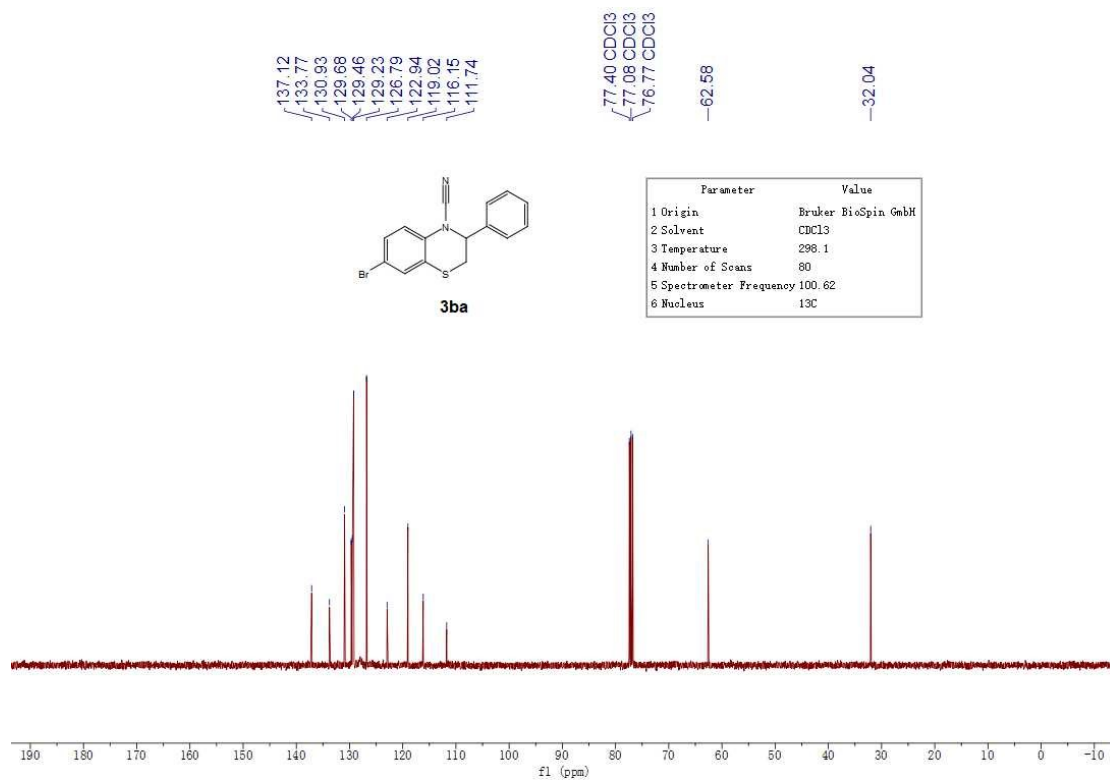

<sup>13</sup>C NMR spectrum of **3ba** (100 MHz, CDCl<sub>3</sub>)

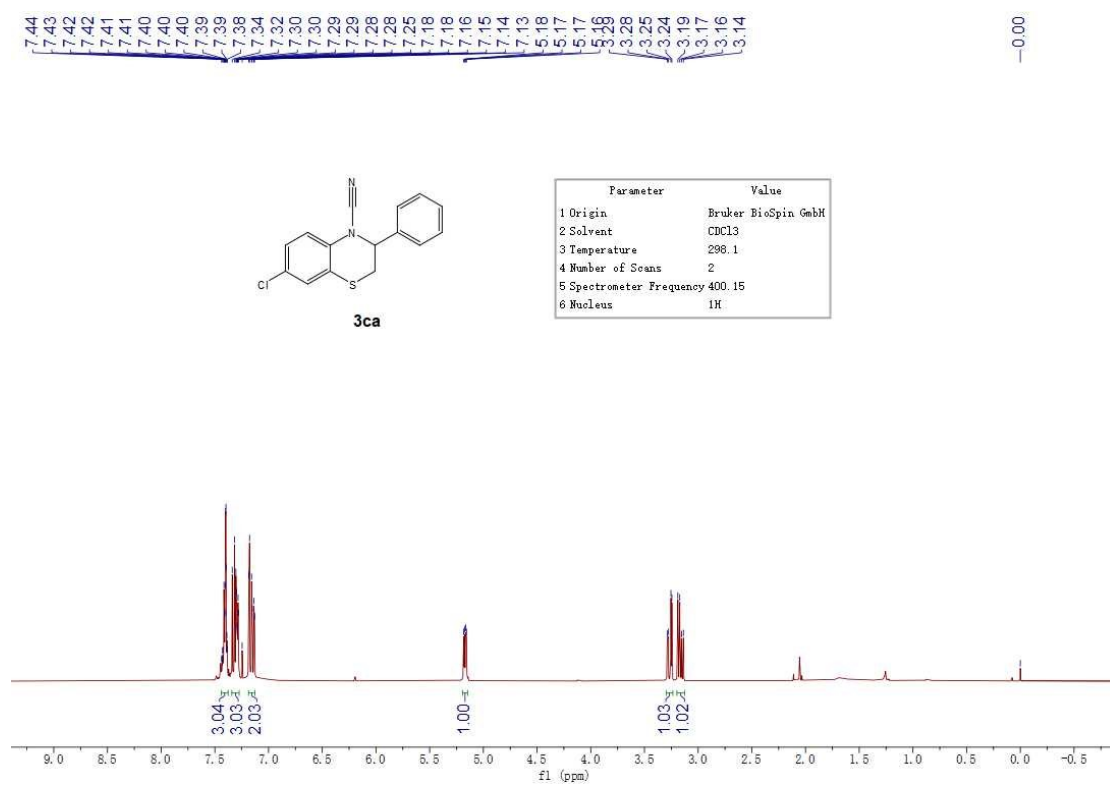

<sup>1</sup>H NMR spectrum of **3ca** (400 MHz, CDCl<sub>3</sub>)

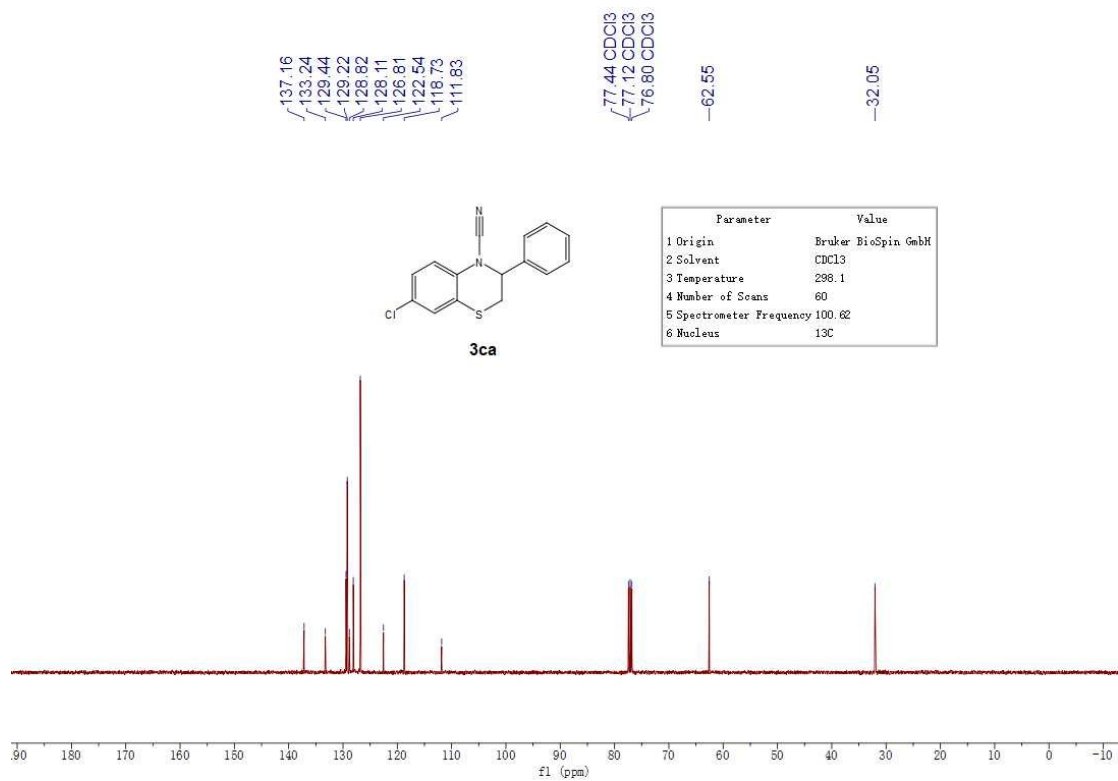

<sup>13</sup>C NMR spectrum of **3ca** (100 MHz, CDCl<sub>3</sub>)

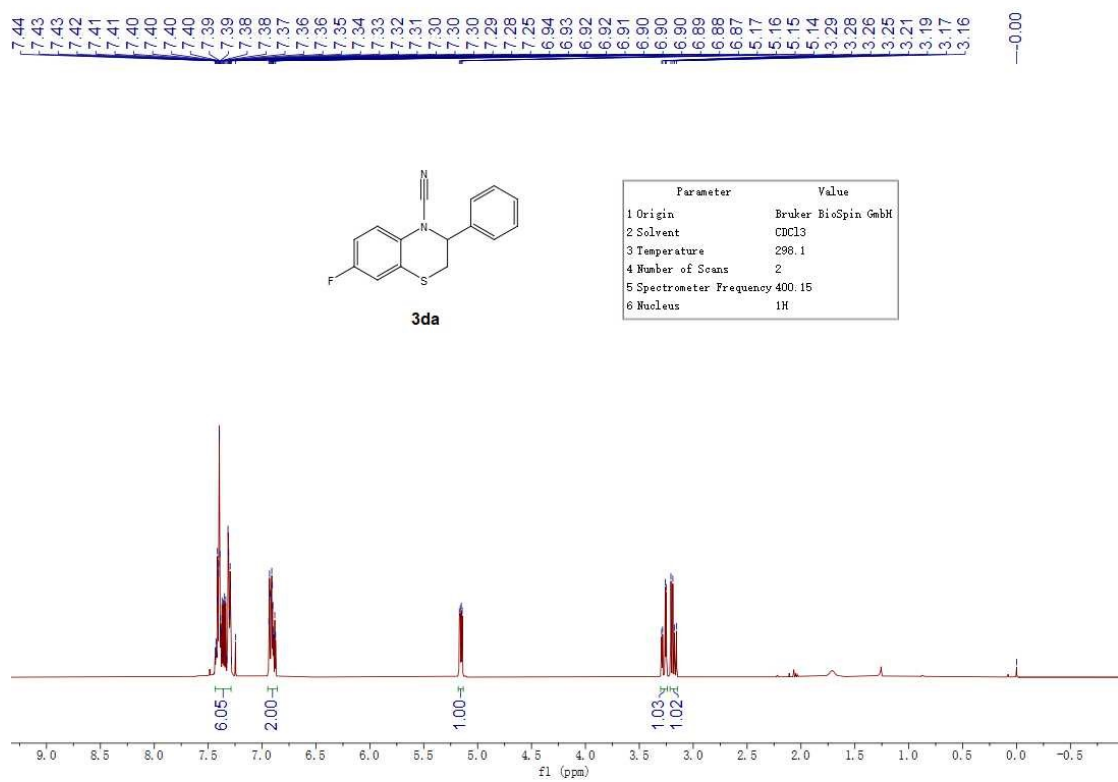

<sup>1</sup>H NMR spectrum of **3da** (400 MHz, CDCl<sub>3</sub>)

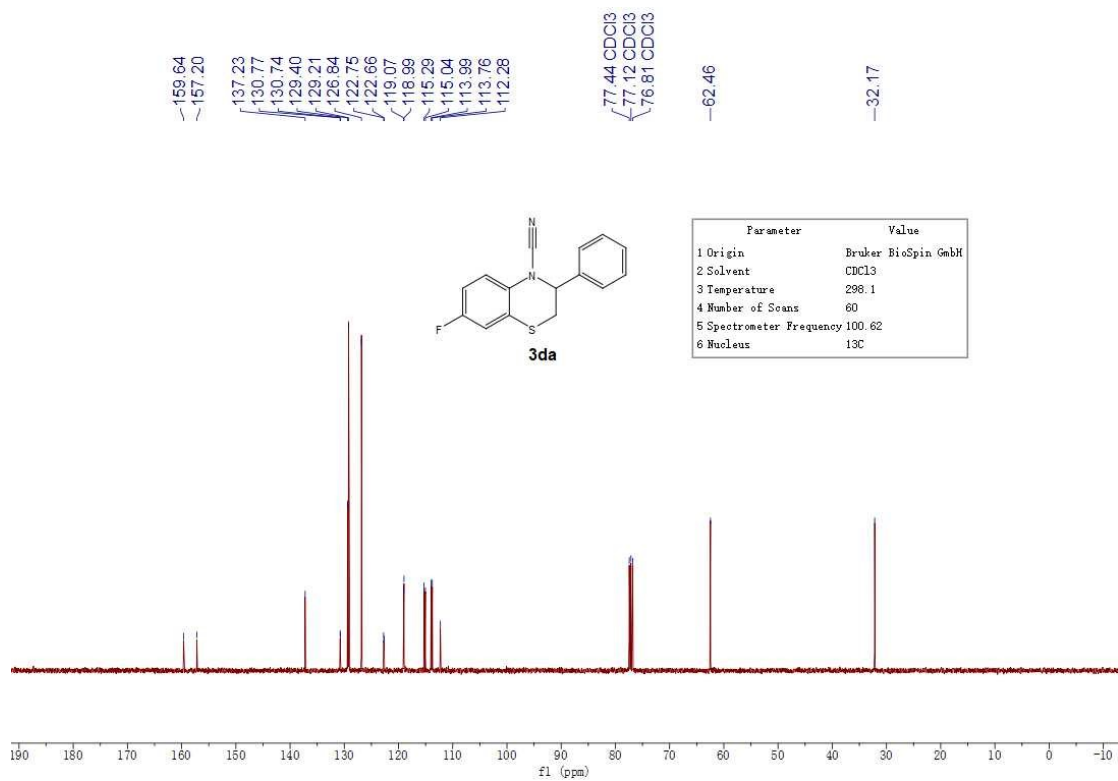

<sup>13</sup>C NMR spectrum of **3da** (100 MHz, CDCl<sub>3</sub>)

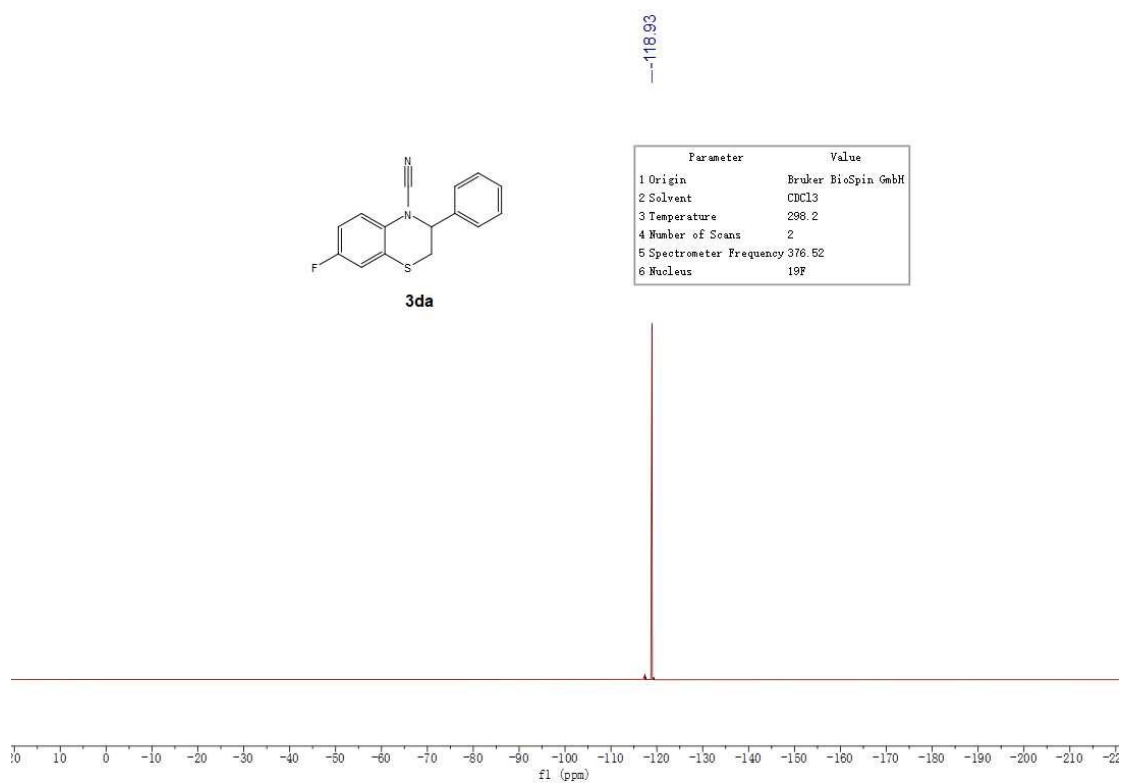

<sup>19</sup>F NMR spectrum of **3da** (376 MHz, CDCl<sub>3</sub>)

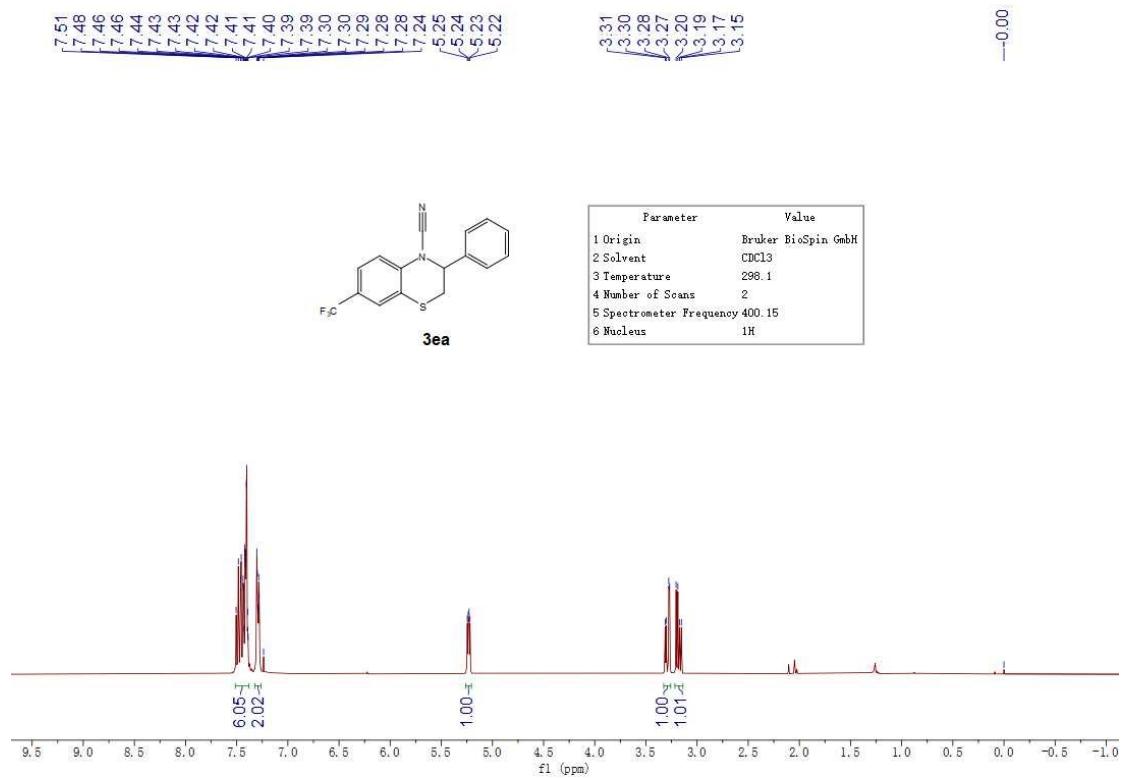

<sup>1</sup>H NMR spectrum of **3ea** (400 MHz, CDCl<sub>3</sub>)

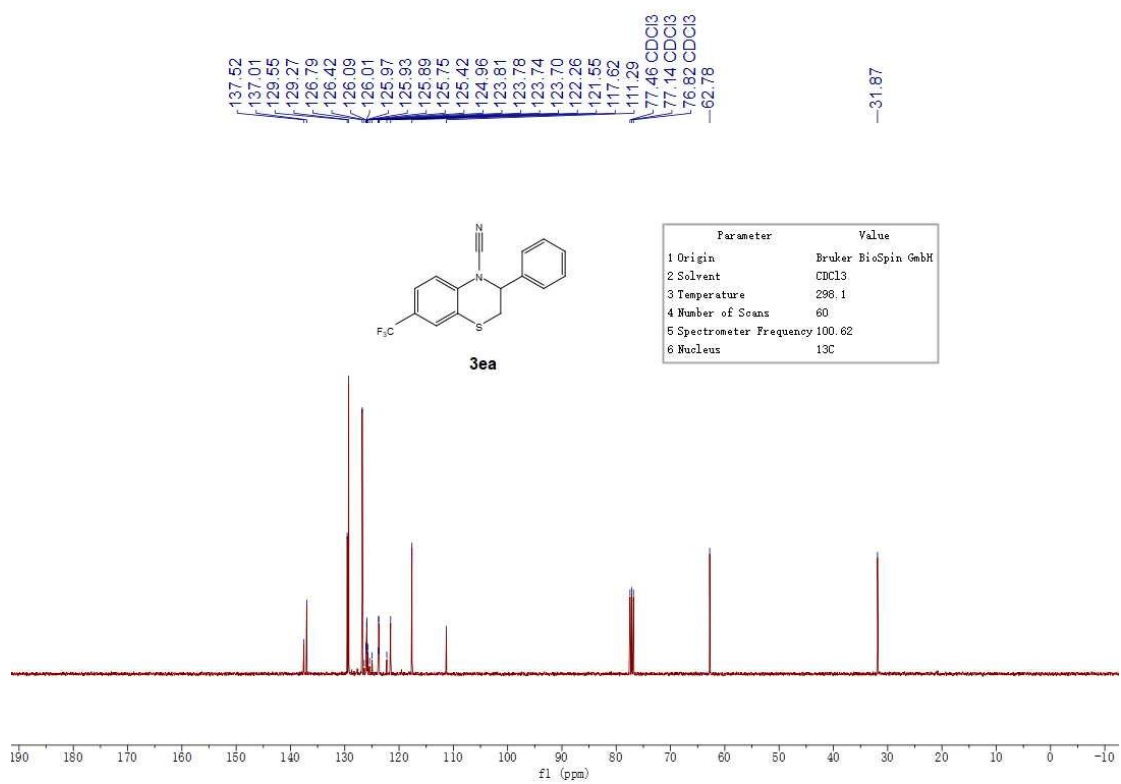

<sup>13</sup>C NMR spectrum of **3ea** (100 MHz, CDCl<sub>3</sub>)

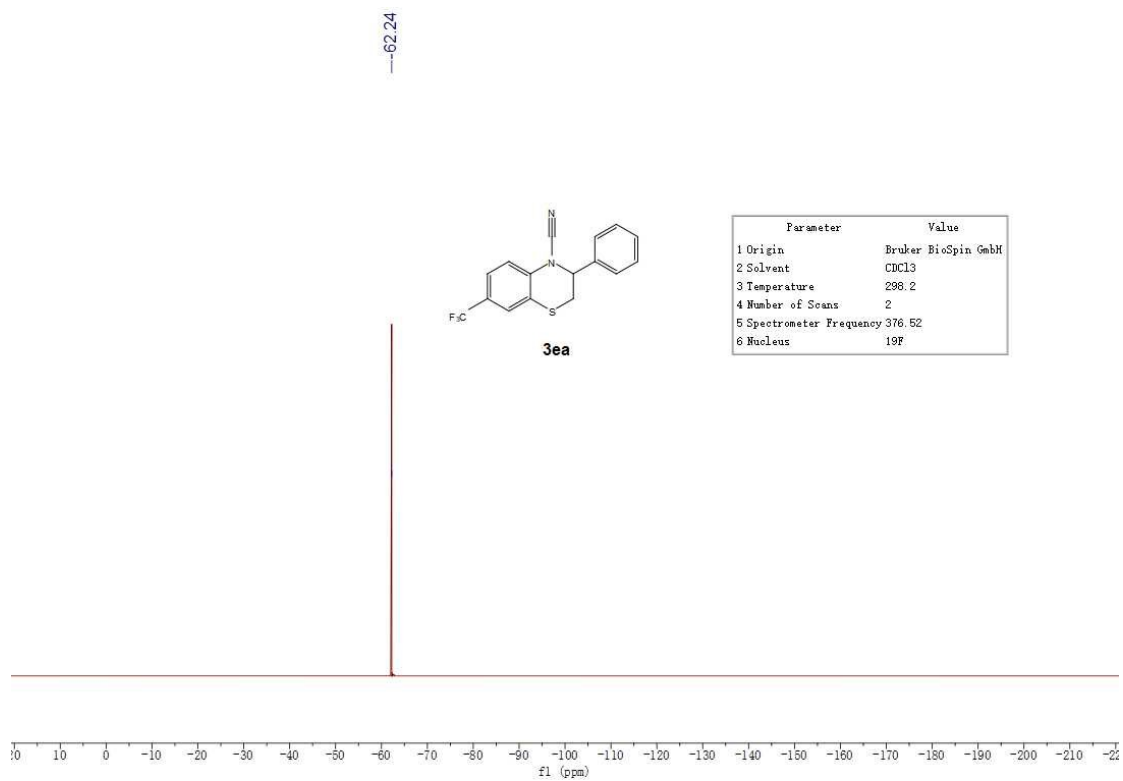

<sup>19</sup>F NMR spectrum of **3ea** (376 MHz, CDCl<sub>3</sub>)

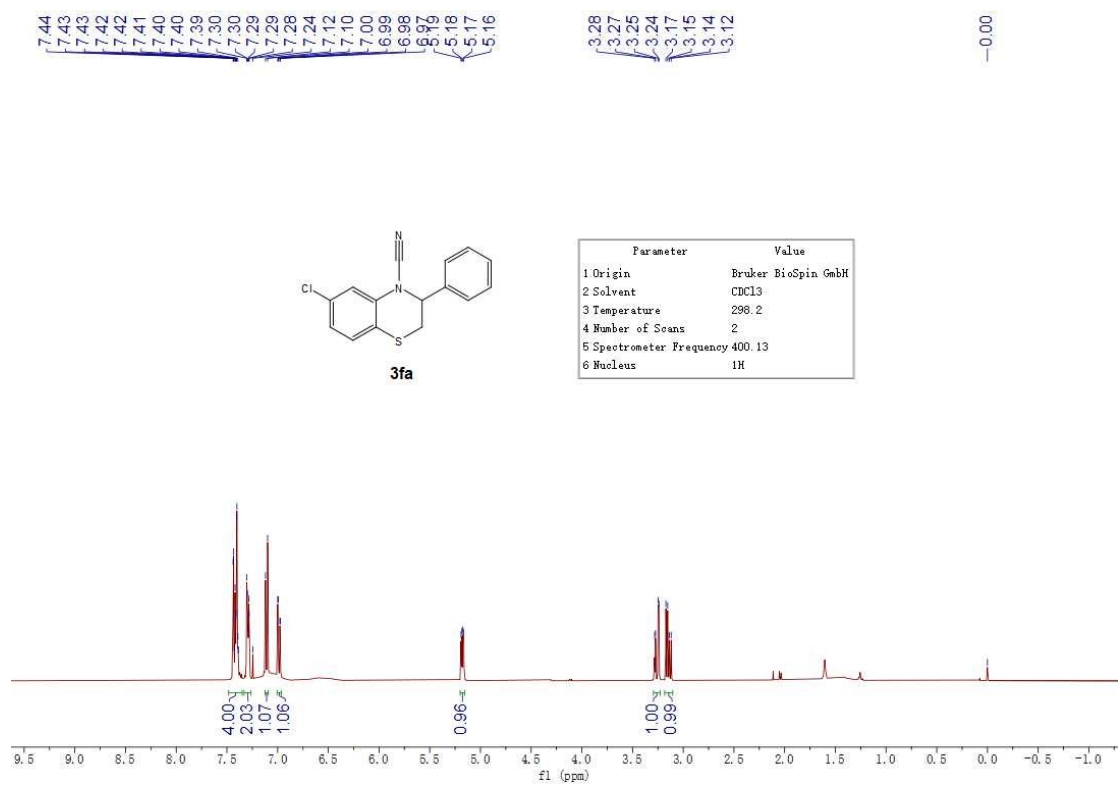

<sup>1</sup>H NMR spectrum of **3fa** (400 MHz, CDCl<sub>3</sub>)



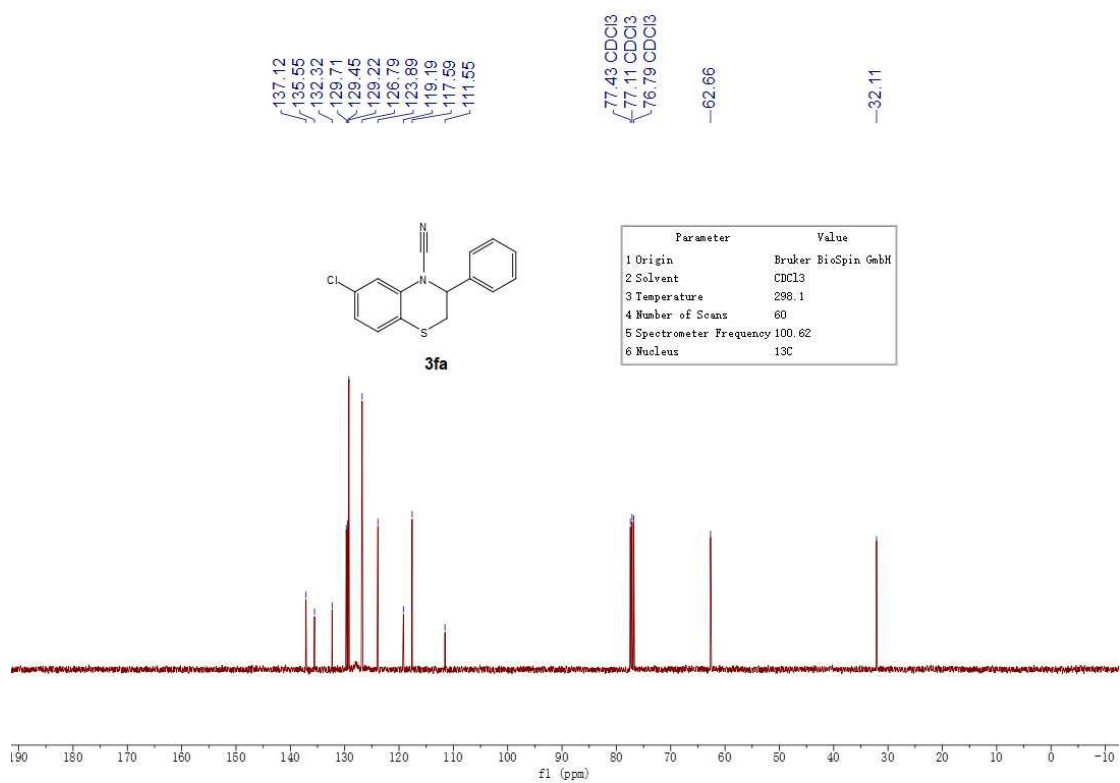

<sup>13</sup>C NMR spectrum of **3fa** (100 MHz, CDCl<sub>3</sub>)

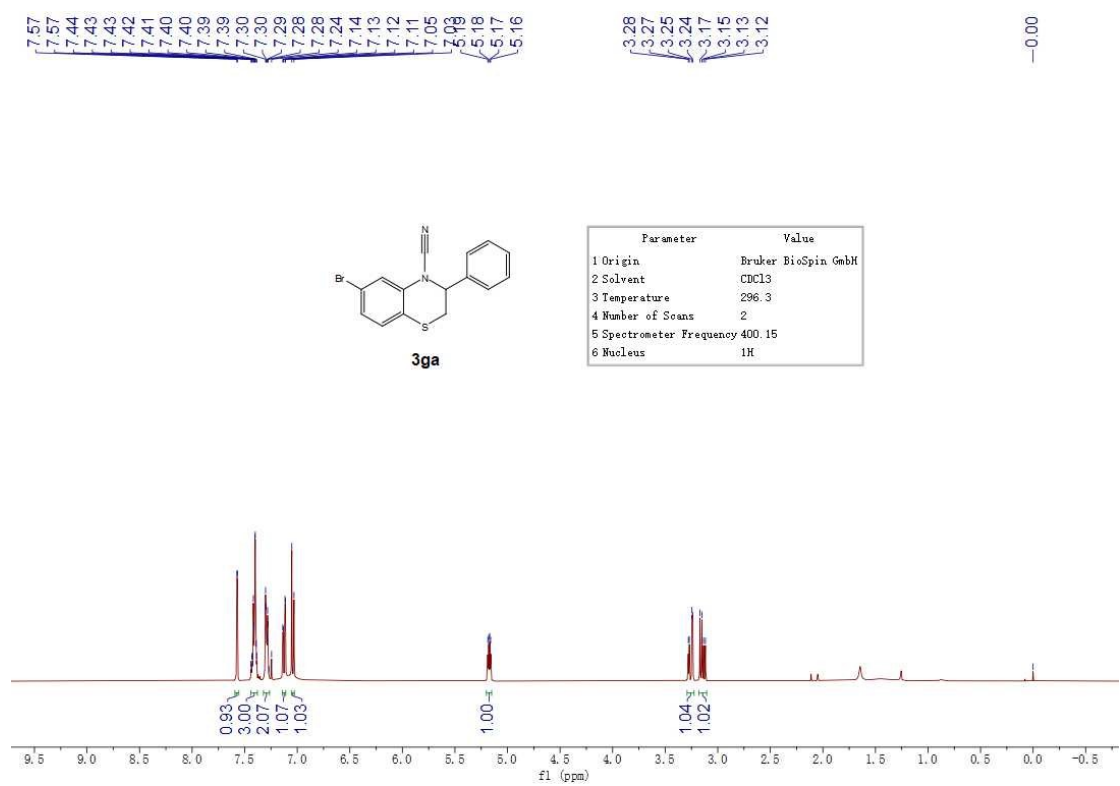

<sup>1</sup>H NMR spectrum of **3ga** (400 MHz, CDCl<sub>3</sub>)

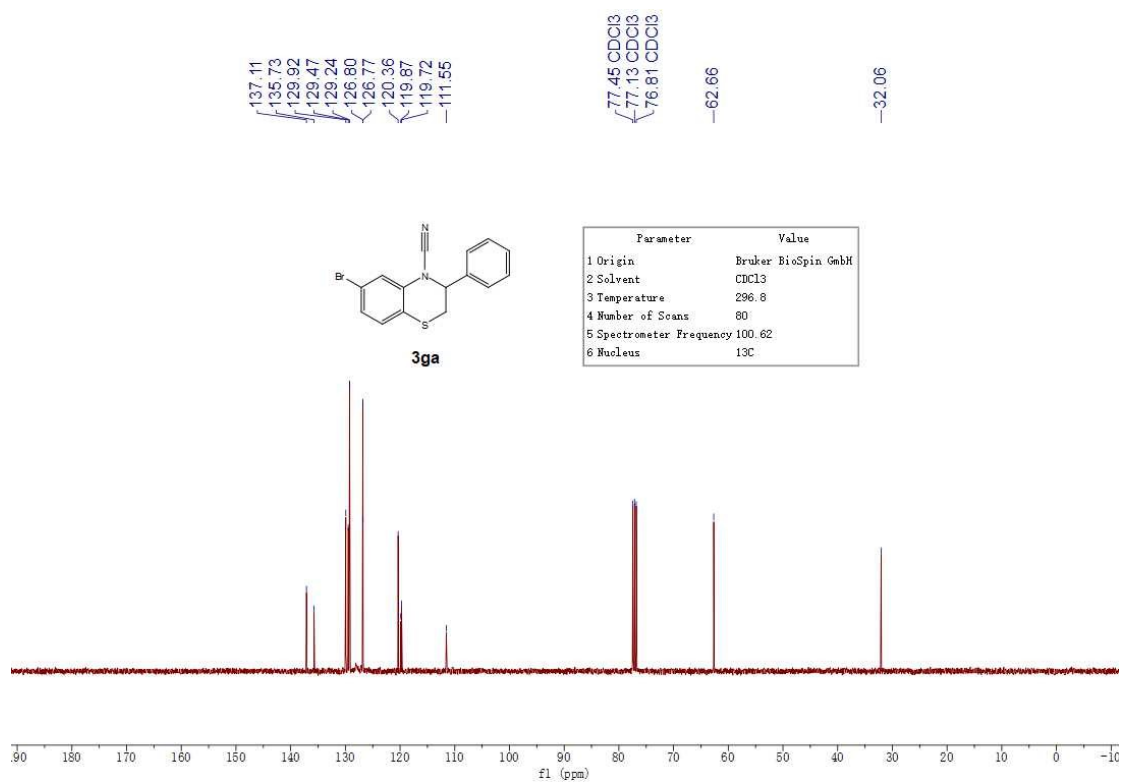

<sup>13</sup>C NMR spectrum of **3ga** (100 MHz, CDCl<sub>3</sub>)

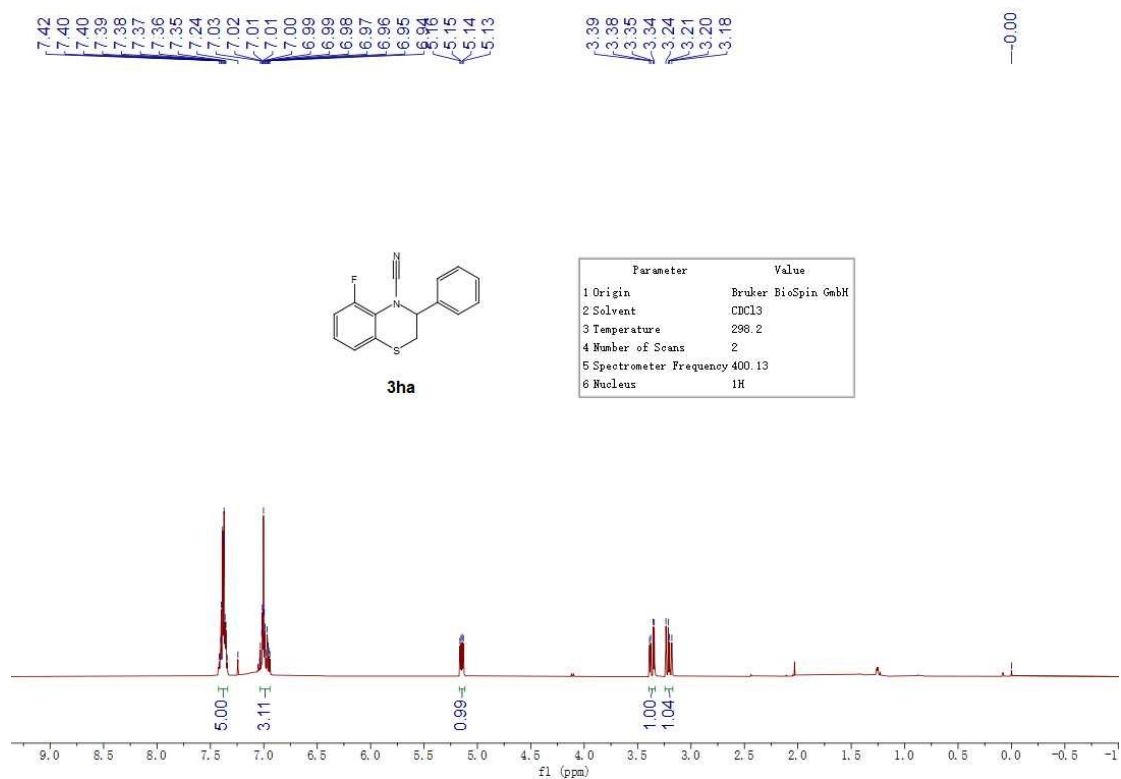

<sup>1</sup>H NMR spectrum of **3ha** (400 MHz, CDCl<sub>3</sub>)

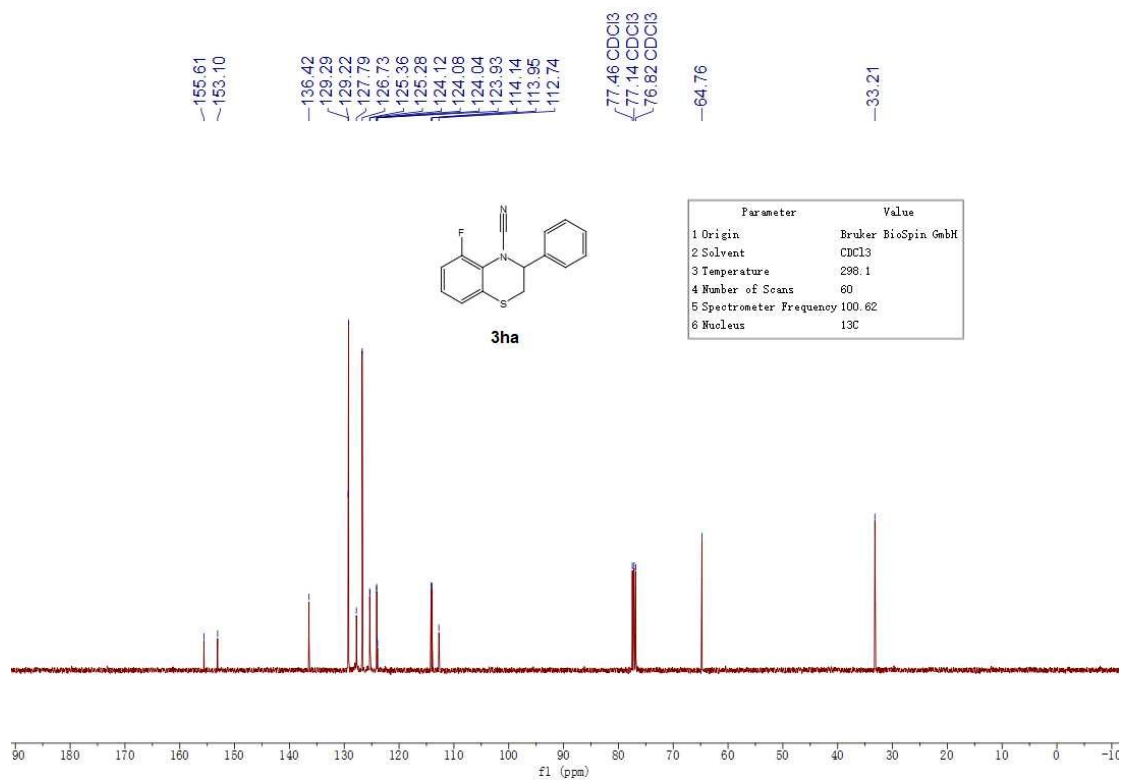

$^{13}\text{C}$  NMR spectrum of **3ha** (100 MHz,  $\text{CDCl}_3$ )

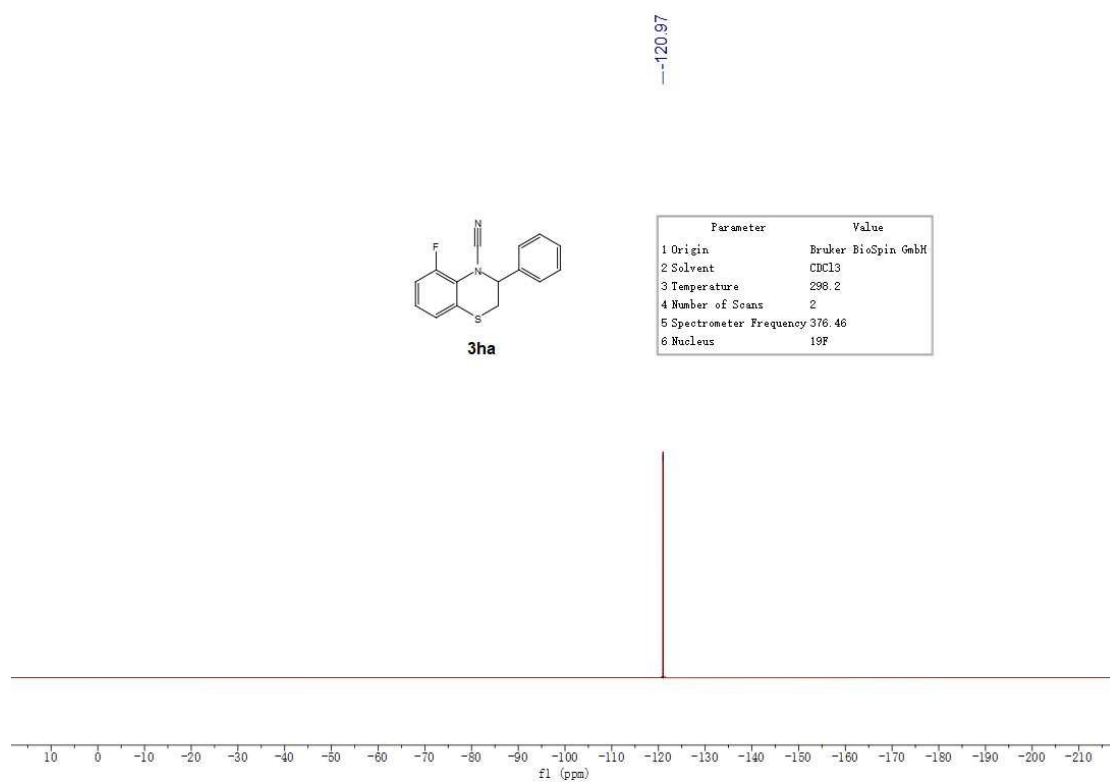

$^{19}\text{F}$  NMR spectrum of **3ha** (376 MHz,  $\text{CDCl}_3$ )

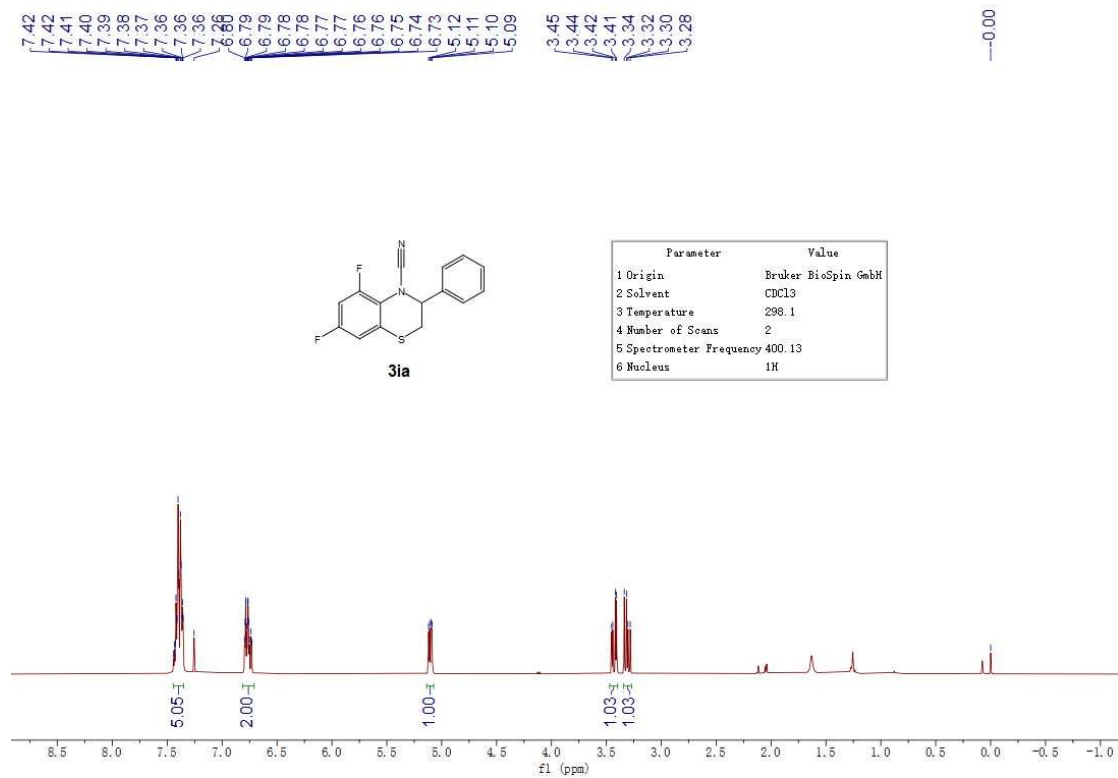

<sup>1</sup>H NMR spectrum of **3ia** (400 MHz, CDCl<sub>3</sub>)

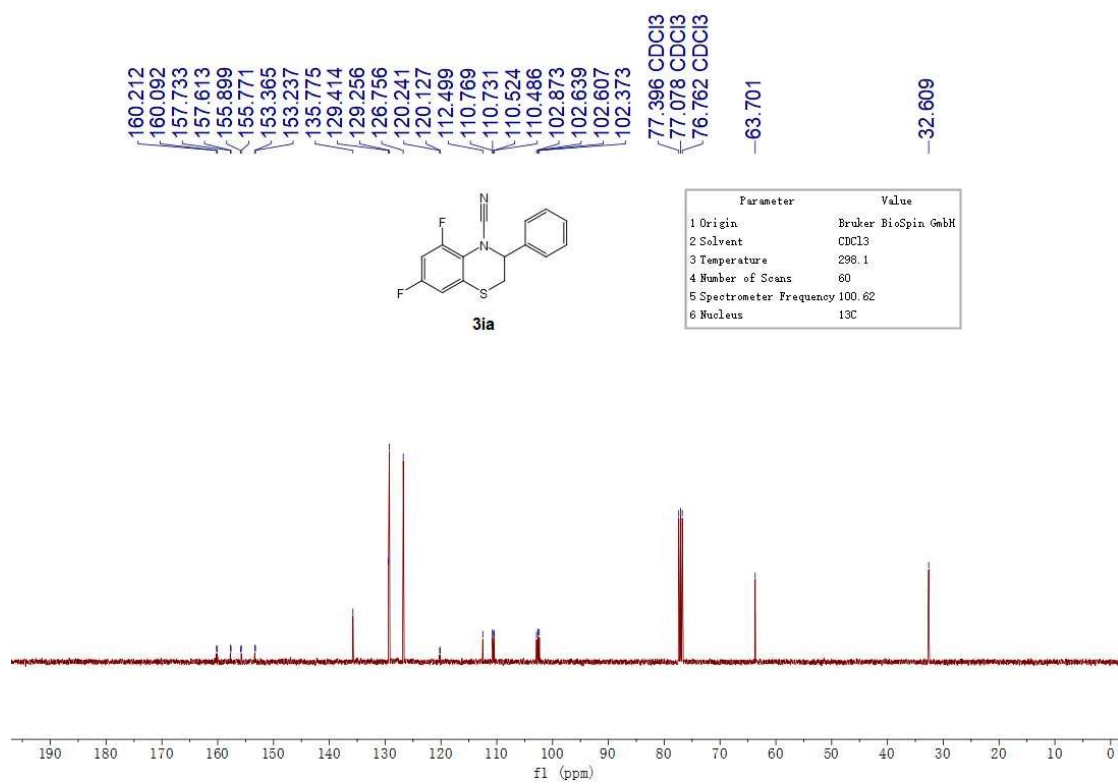

<sup>13</sup>C NMR spectrum of **3ia** (100 MHz, CDCl<sub>3</sub>)

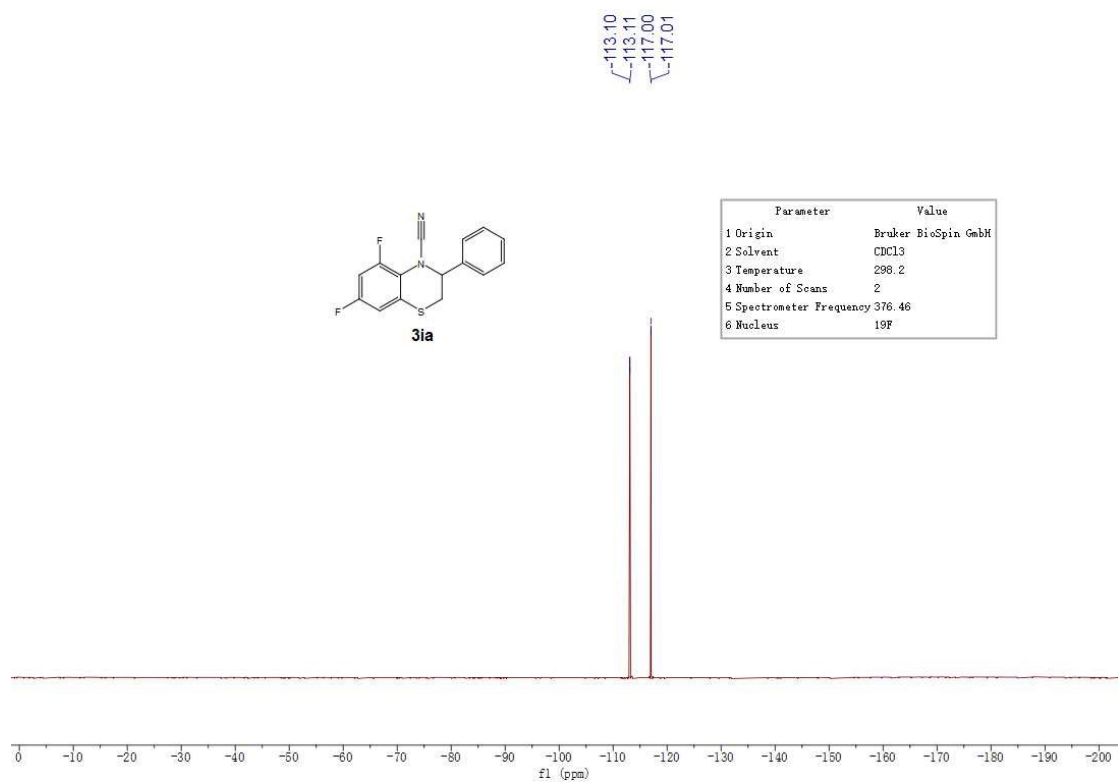

<sup>19</sup>F NMR spectrum of **3ia** (376 MHz, CDCl<sub>3</sub>)

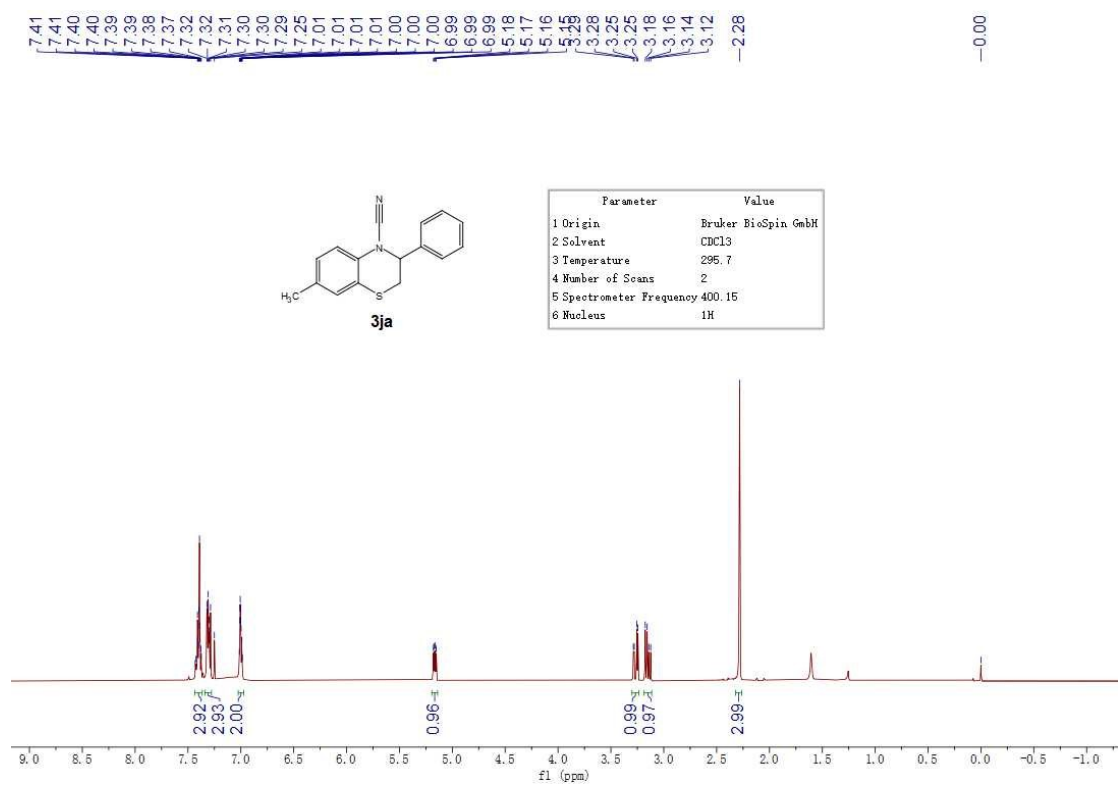

<sup>1</sup>H NMR spectrum of **3ja** (400 MHz, CDCl<sub>3</sub>)

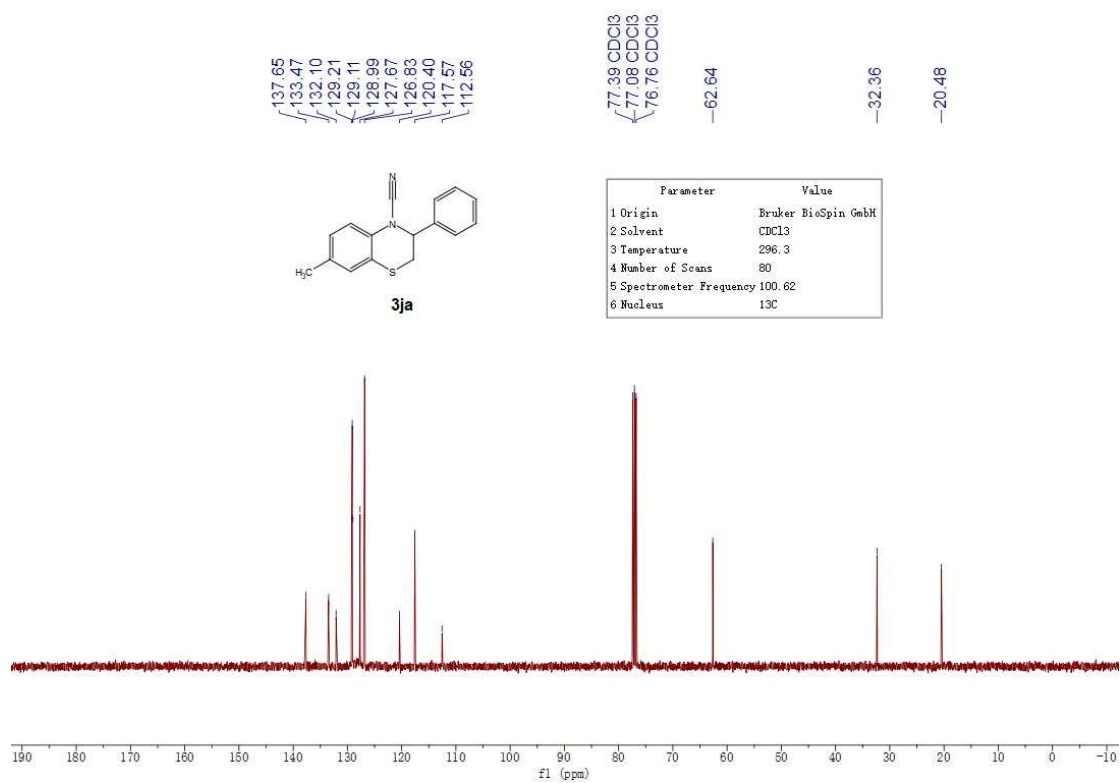

**13C NMR spectrum of 3ja (100 MHz, CDCl<sub>3</sub>)**

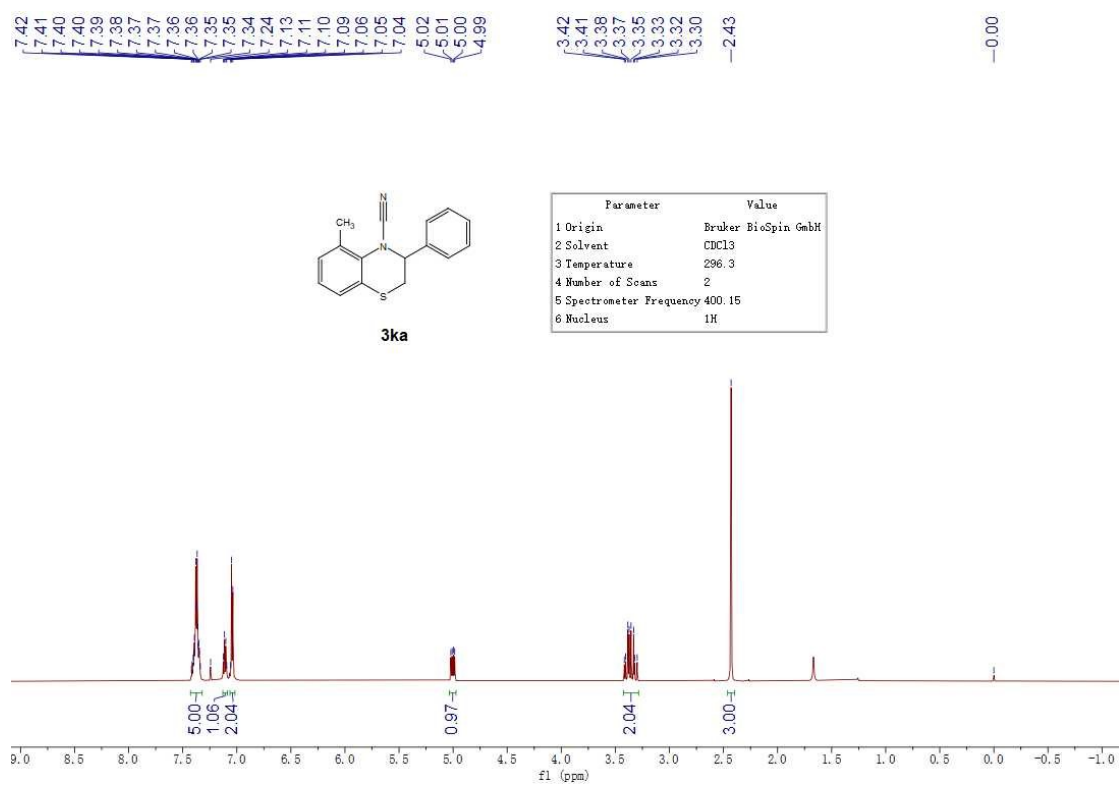

**1H NMR spectrum of 3ka (400 MHz, CDCl<sub>3</sub>)**

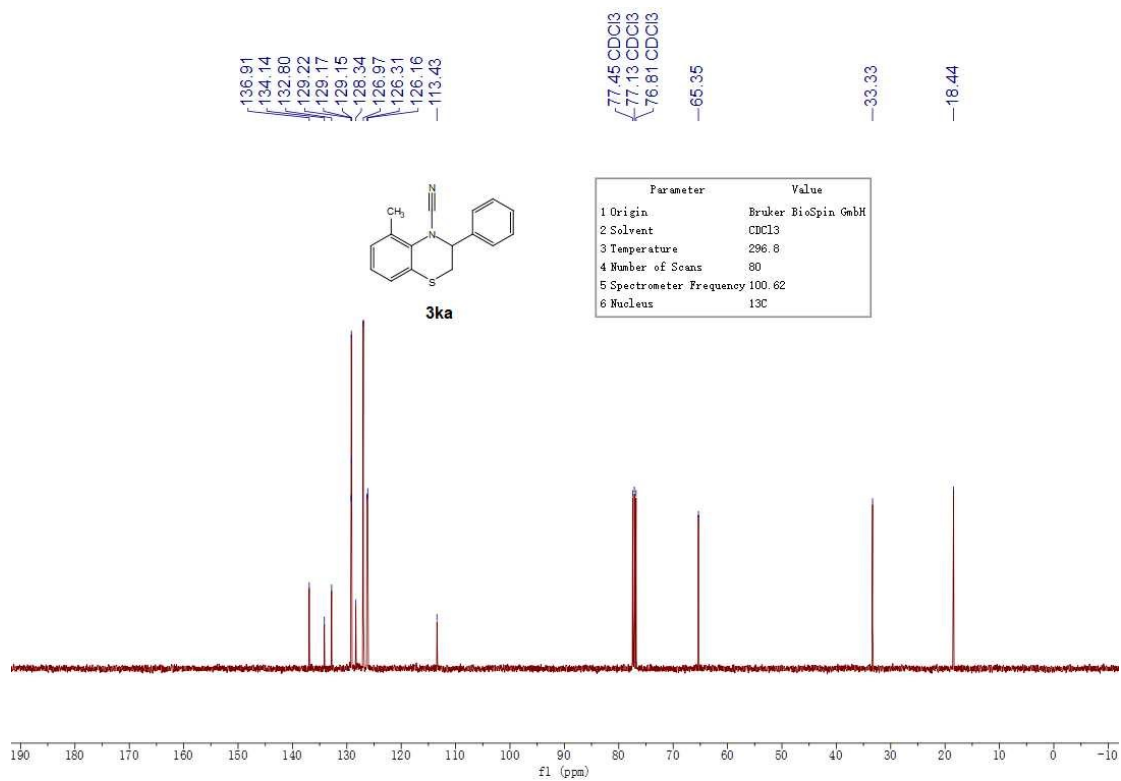

<sup>13</sup>C NMR spectrum of **3ka** (100 MHz, CDCl<sub>3</sub>)

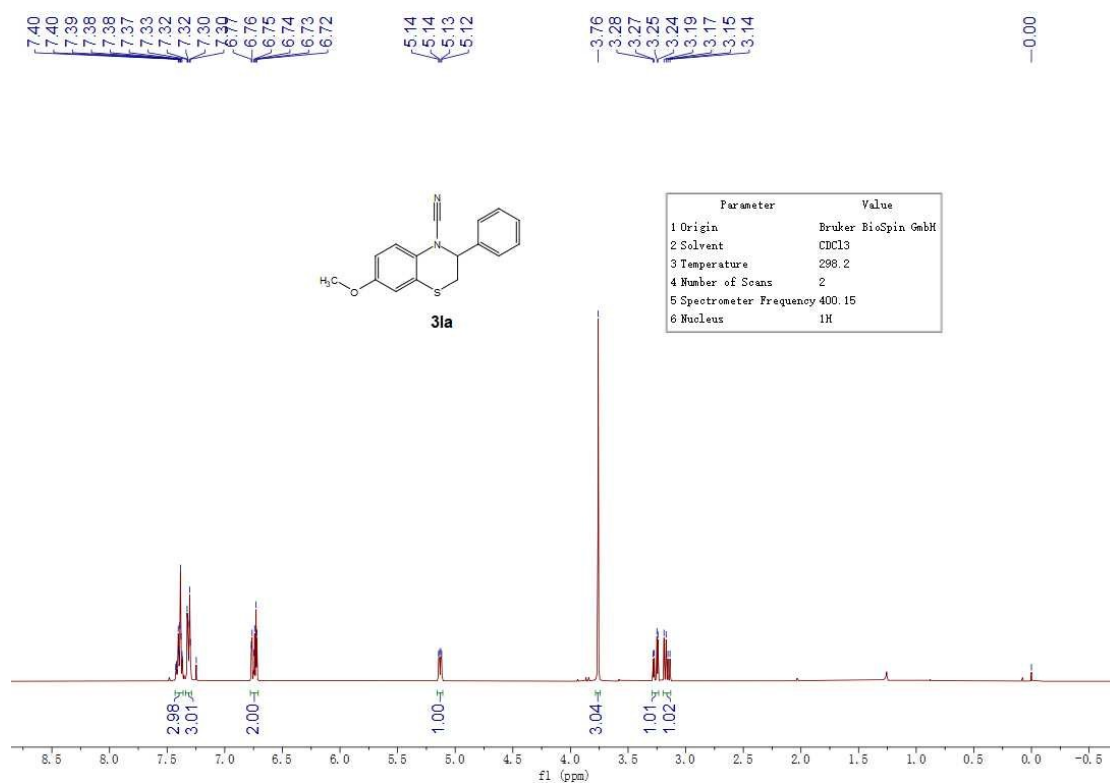

<sup>1</sup>H NMR spectrum of **3la** (400 MHz, CDCl<sub>3</sub>)

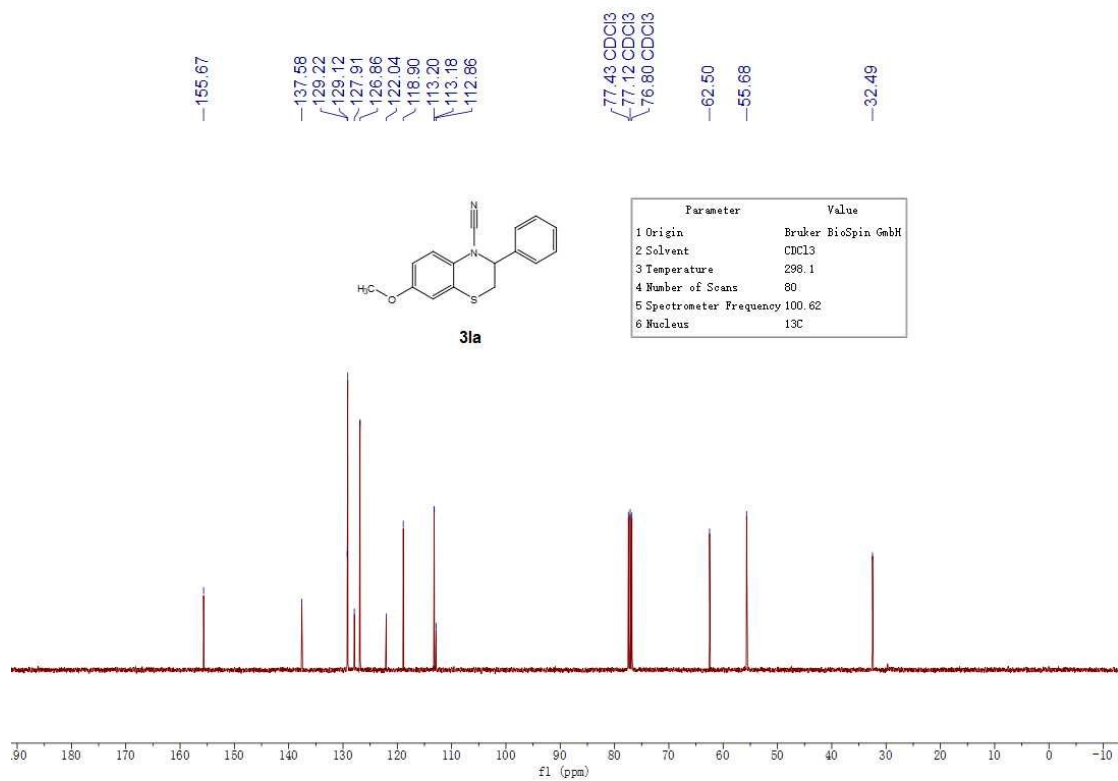

<sup>13</sup>C NMR spectrum of **3la** (100 MHz, CDCl<sub>3</sub>)

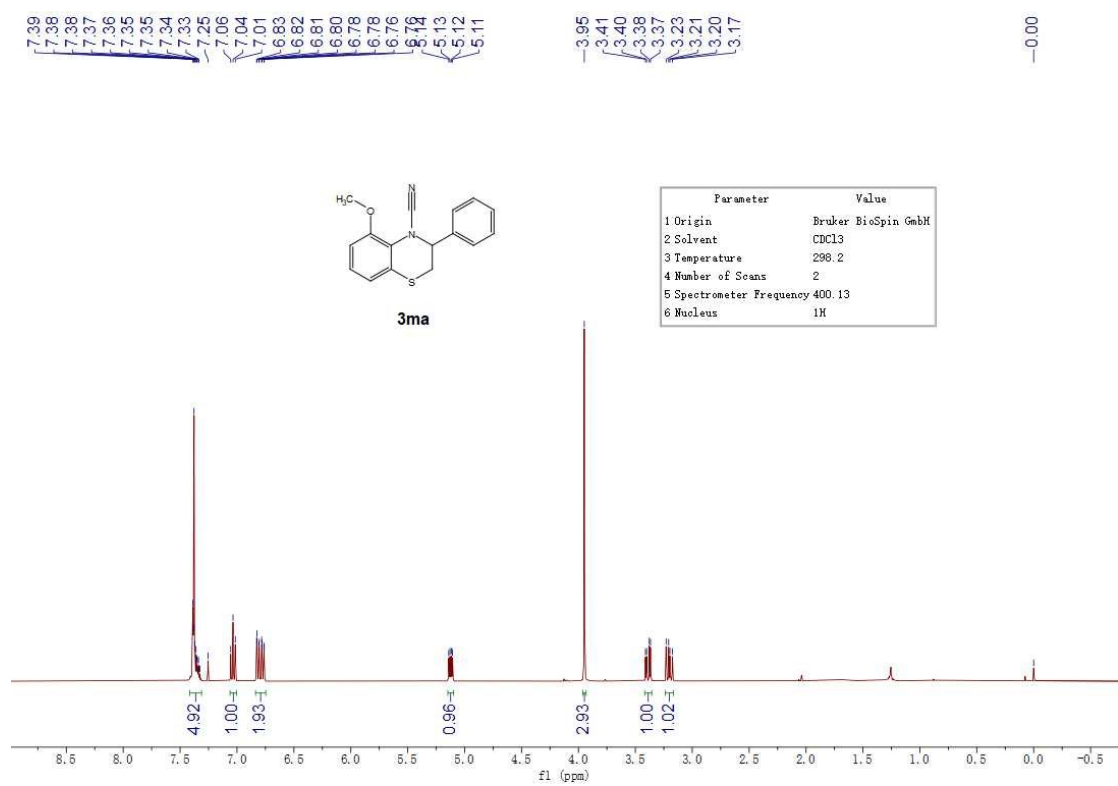

<sup>1</sup>H NMR spectrum of **3ma** (400 MHz, CDCl<sub>3</sub>)



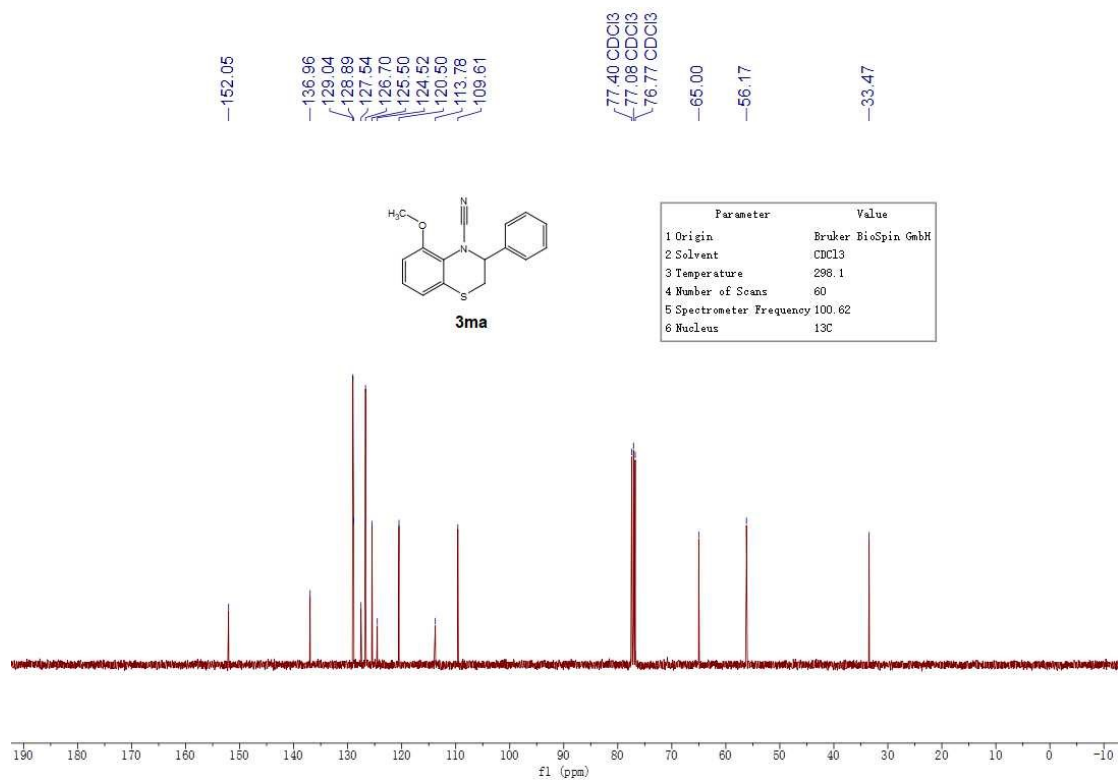

<sup>13</sup>C NMR spectrum of **3ma** (100 MHz, CDCl<sub>3</sub>)

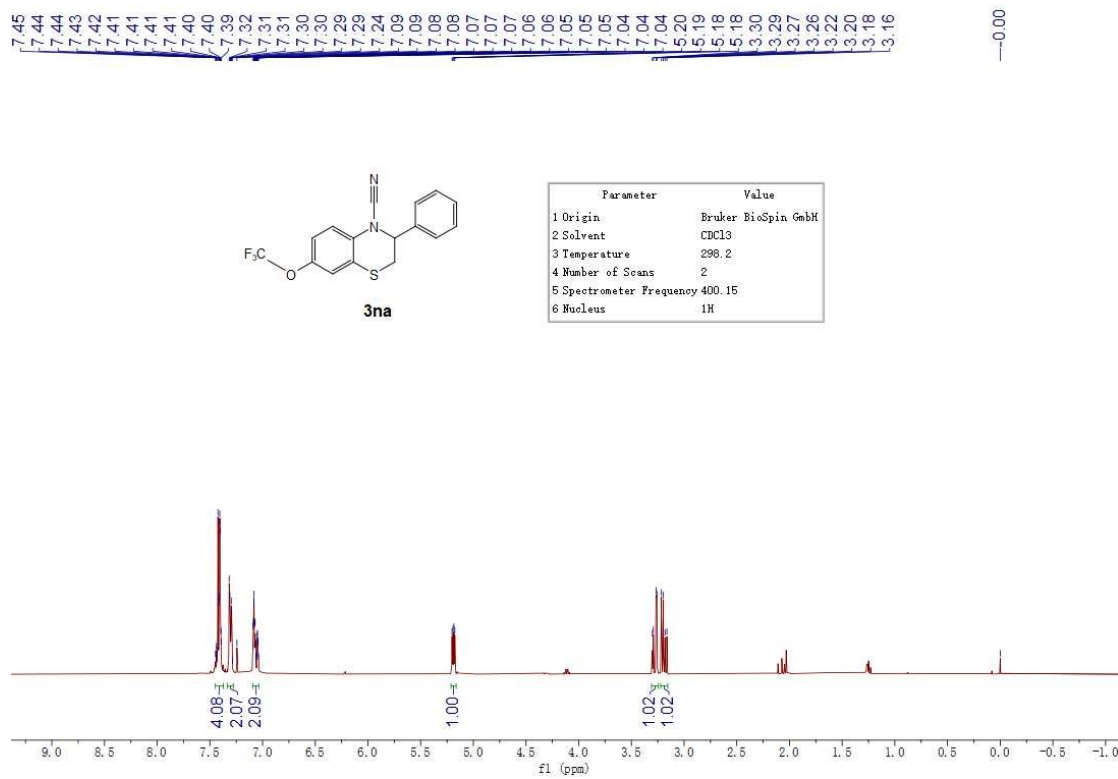

<sup>1</sup>H NMR spectrum of **3na** (400 MHz, CDCl<sub>3</sub>)

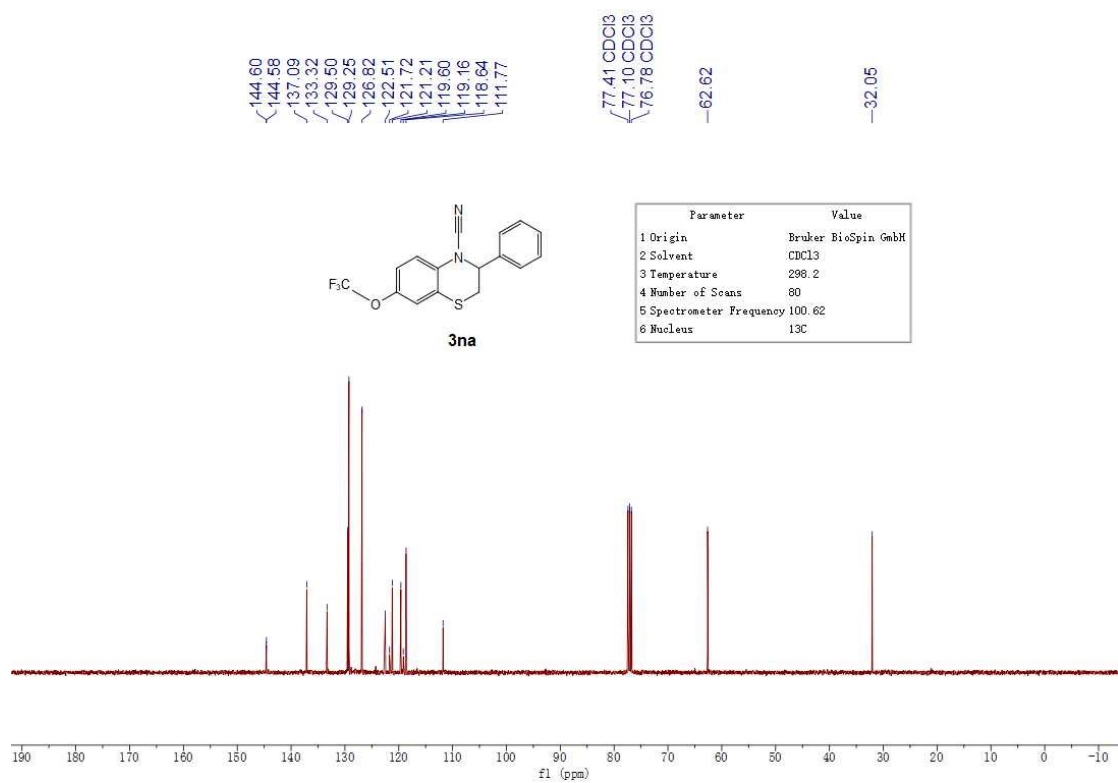

<sup>13</sup>C NMR spectrum of **3na** (100 MHz, CDCl<sub>3</sub>)

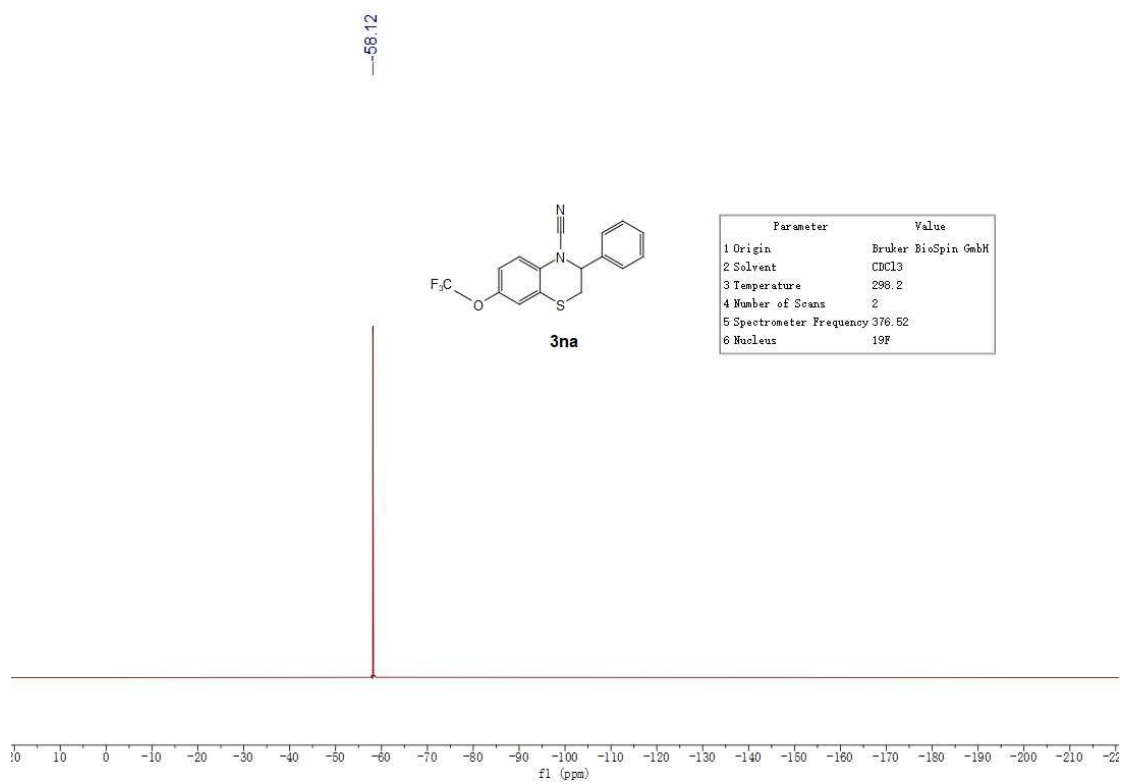

<sup>19</sup>F NMR spectrum of **3na** (376 MHz, CDCl<sub>3</sub>)

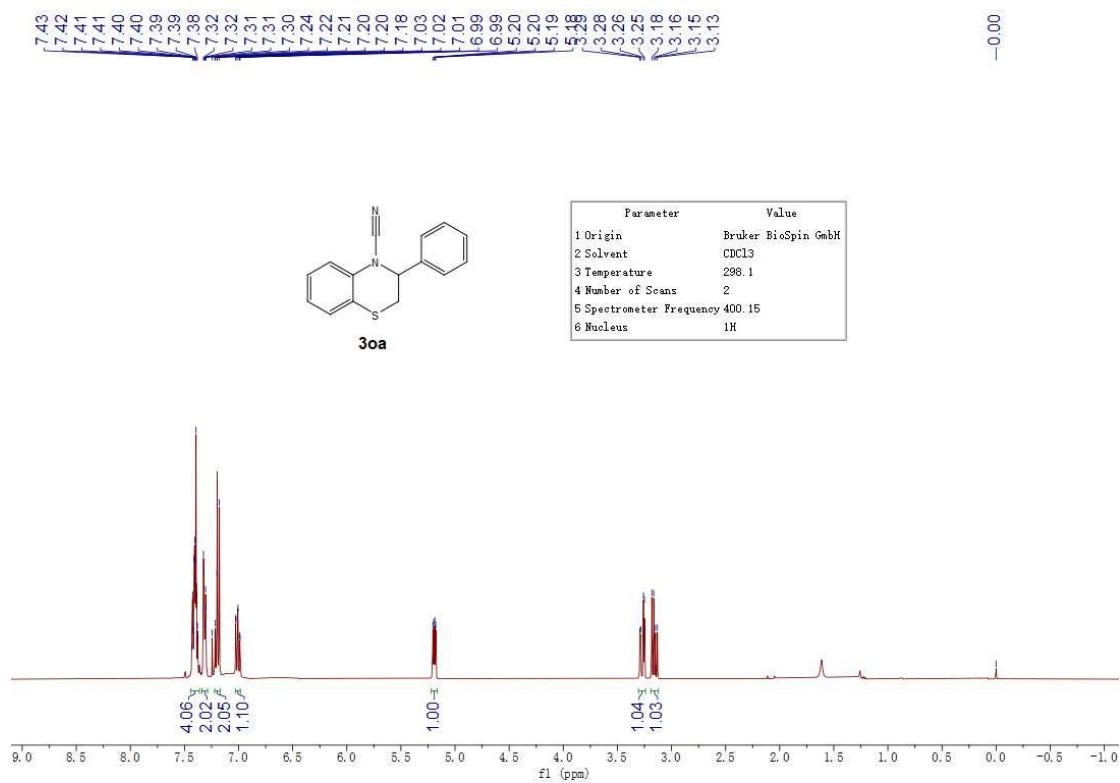

<sup>1</sup>H NMR spectrum of **30a** (400 MHz, CDCl<sub>3</sub>)

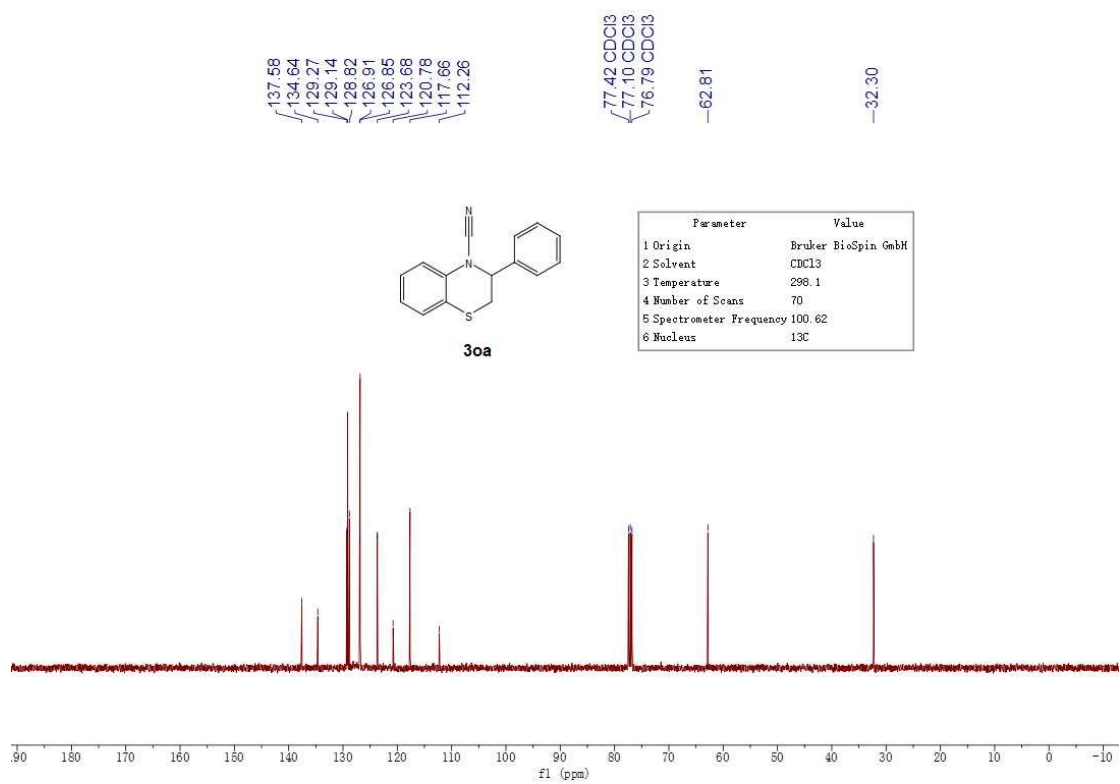

<sup>13</sup>C NMR spectrum of **30a** (100 MHz, CDCl<sub>3</sub>)

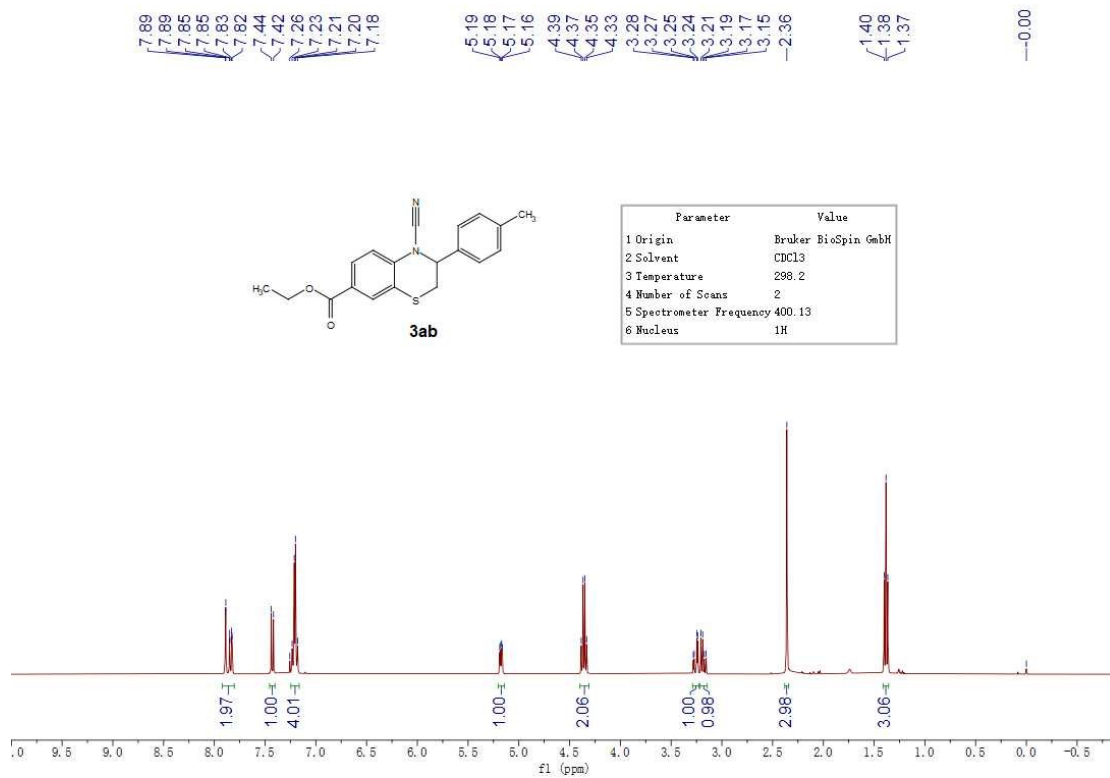

<sup>1</sup>H NMR spectrum of **3ab** (400 MHz, CDCl<sub>3</sub>)

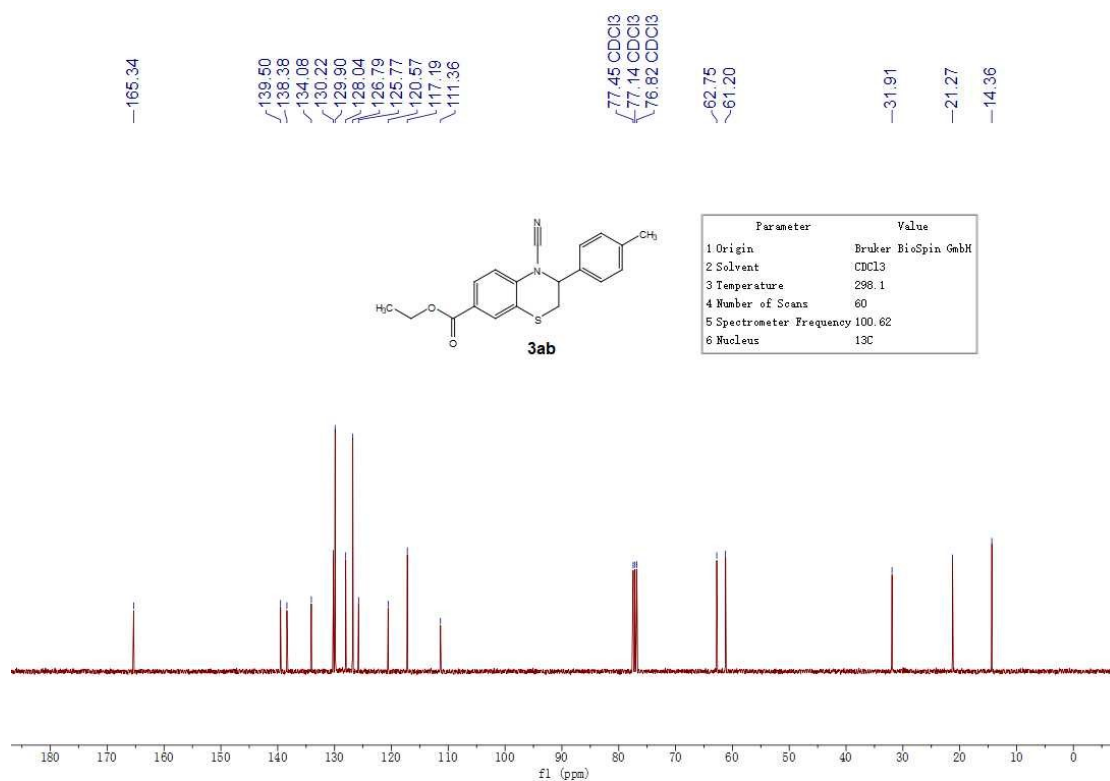

<sup>13</sup>C NMR spectrum of **3ab** (100 MHz, CDCl<sub>3</sub>)

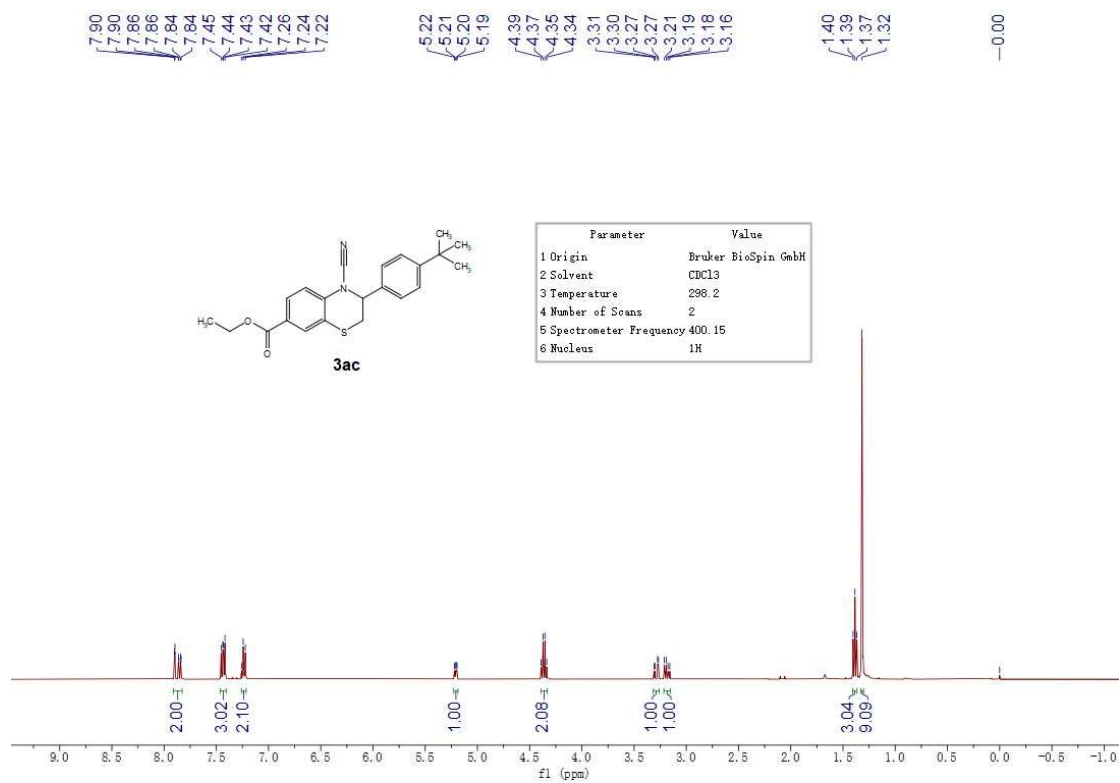

<sup>1</sup>H NMR spectrum of **3ac** (400 MHz, CDCl<sub>3</sub>)

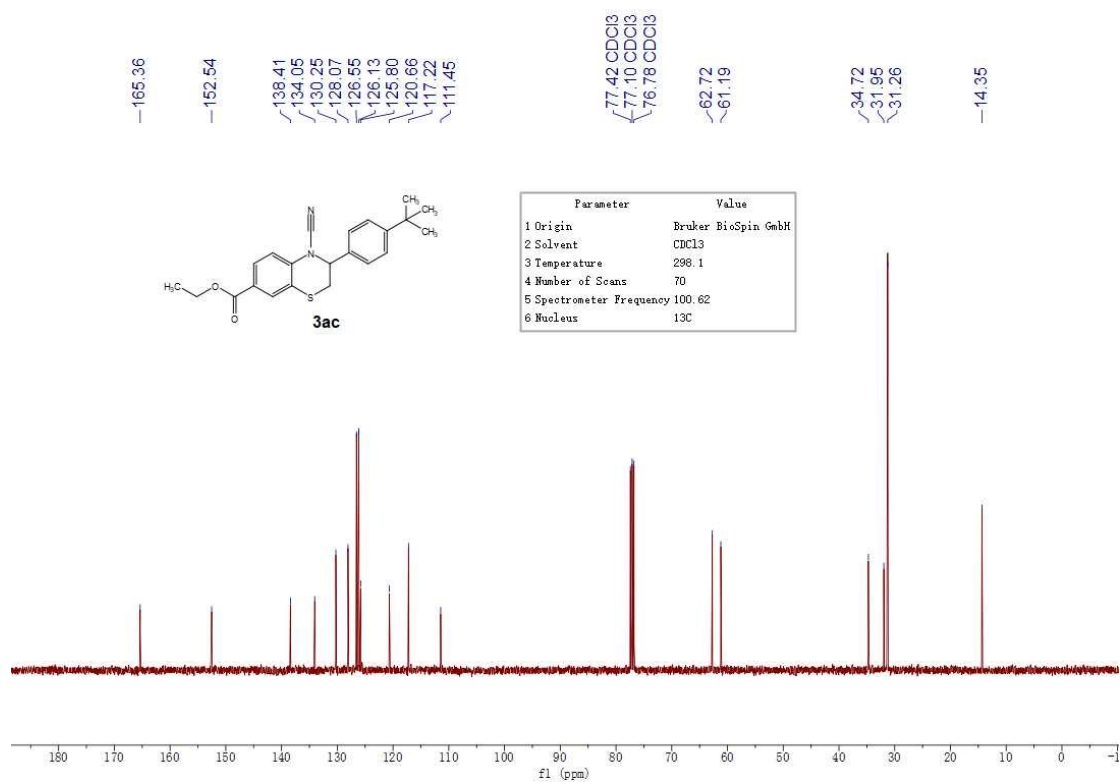

<sup>13</sup>C NMR spectrum of **3ac** (100 MHz, CDCl<sub>3</sub>)

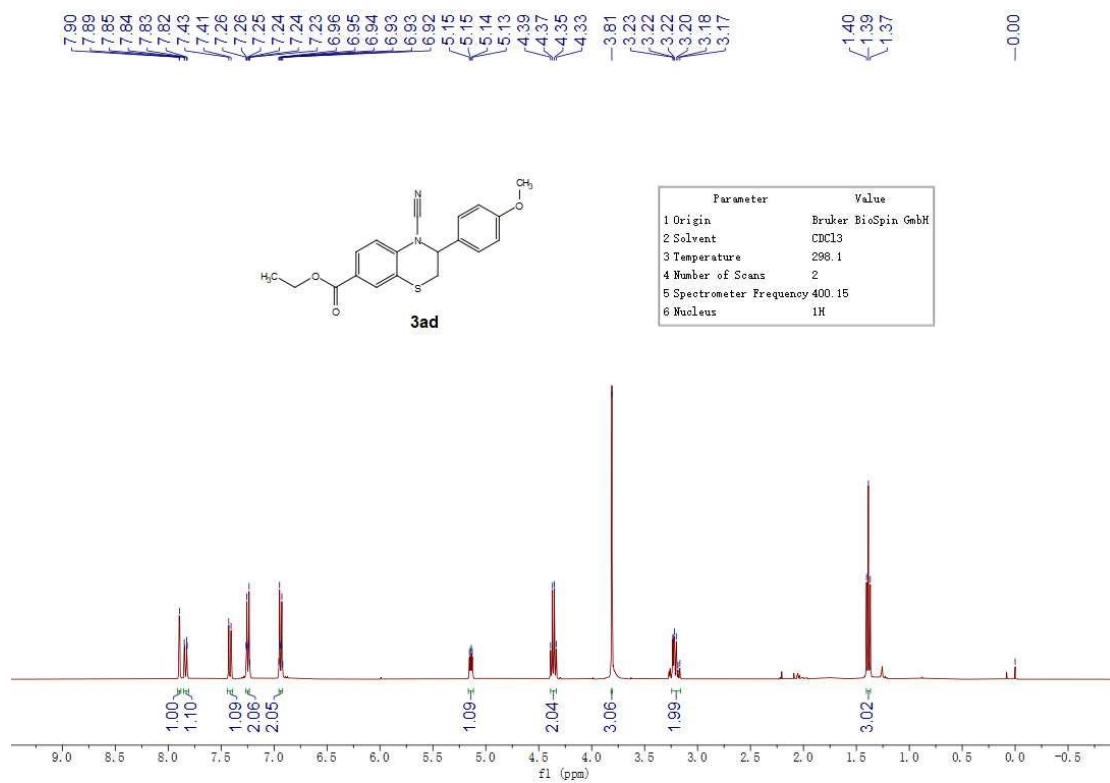

<sup>1</sup>H NMR spectrum of **3ad** (400 MHz, CDCl<sub>3</sub>)

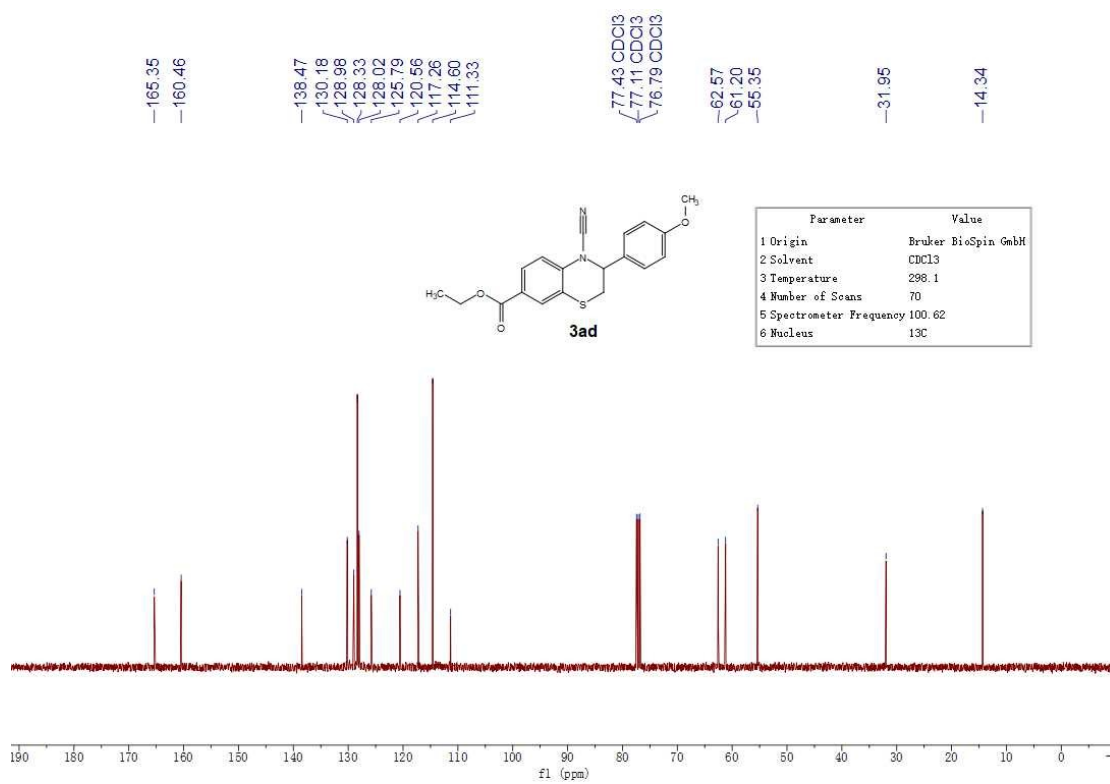

<sup>13</sup>C NMR spectrum of **3ad** (100 MHz, CDCl<sub>3</sub>)

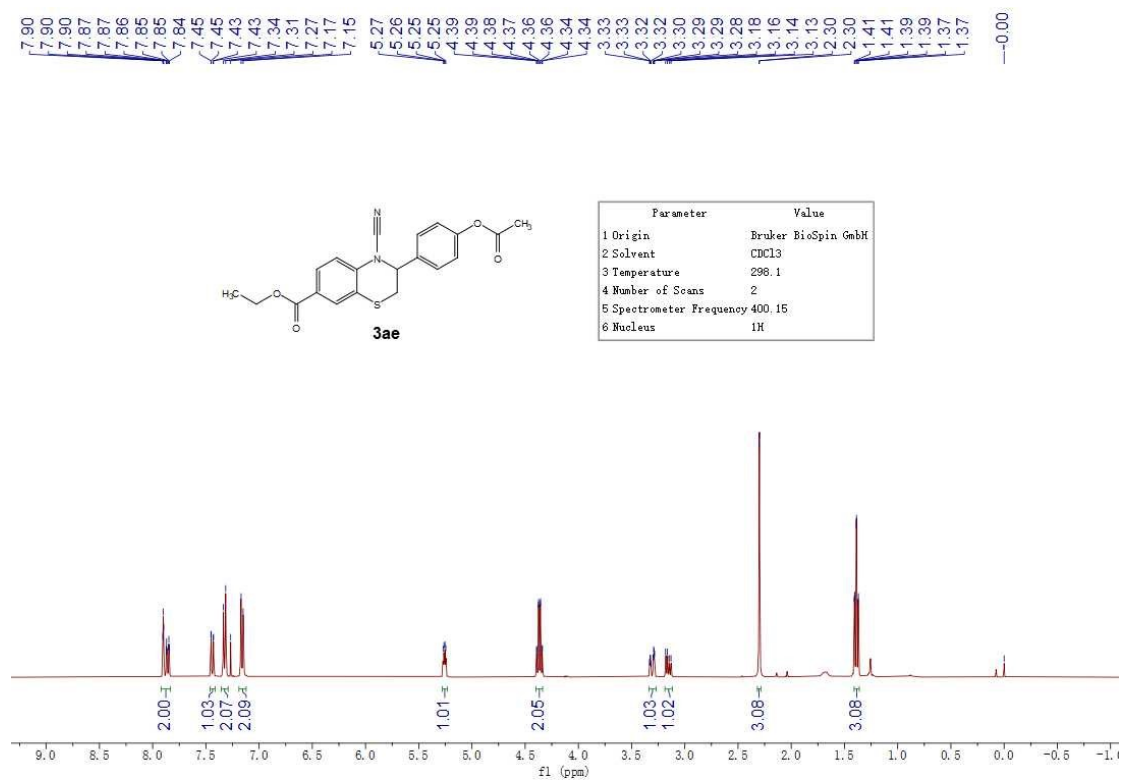

<sup>1</sup>H NMR spectrum of **3ae** (400 MHz, CDCl<sub>3</sub>)

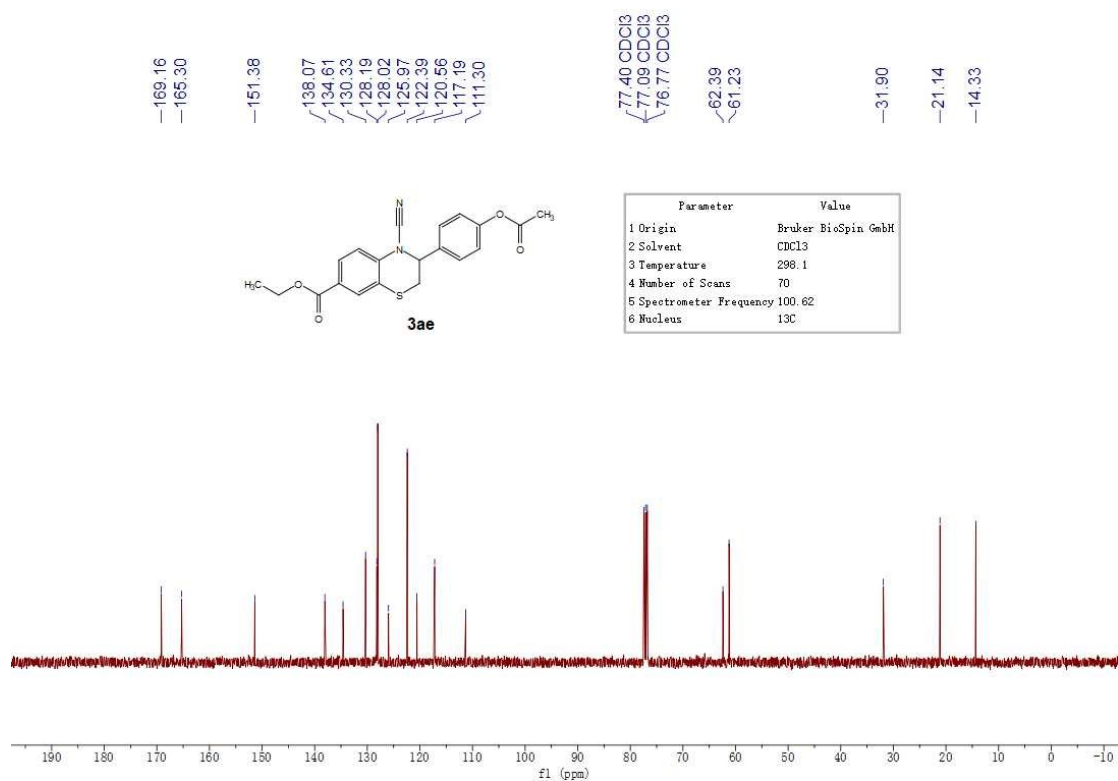

<sup>13</sup>C NMR spectrum of **3ae** (100 MHz, CDCl<sub>3</sub>)

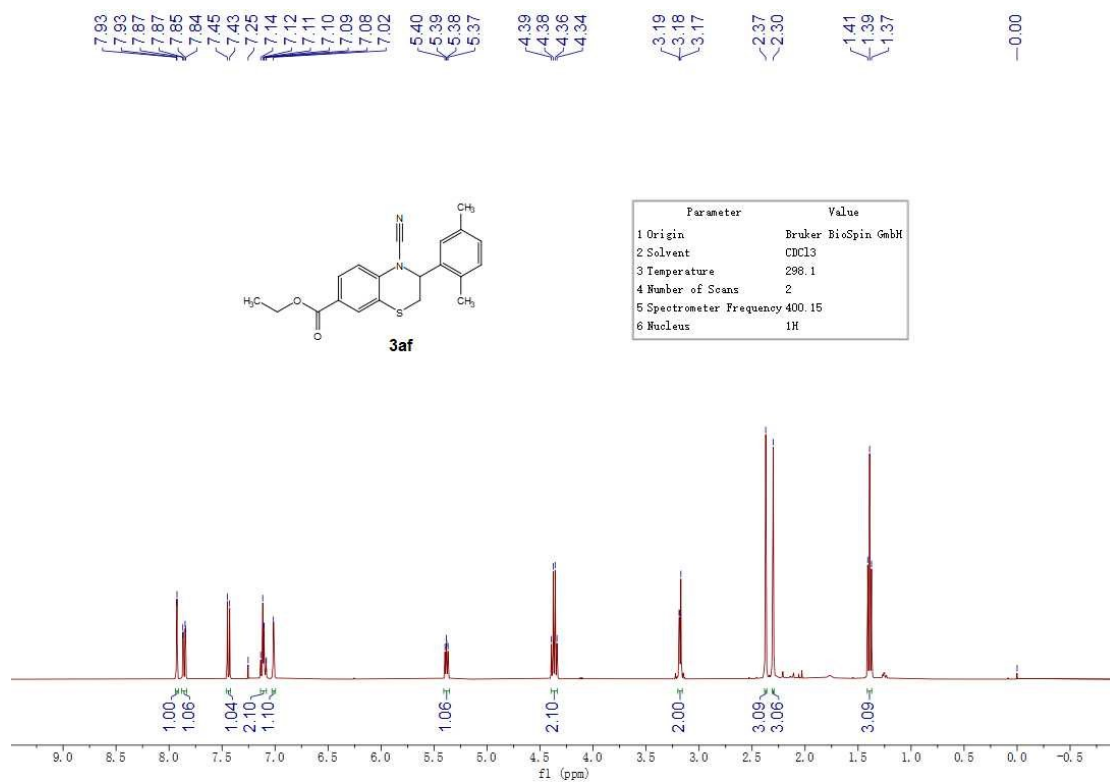

<sup>1</sup>H NMR spectrum of **3af** (400 MHz, CDCl<sub>3</sub>)

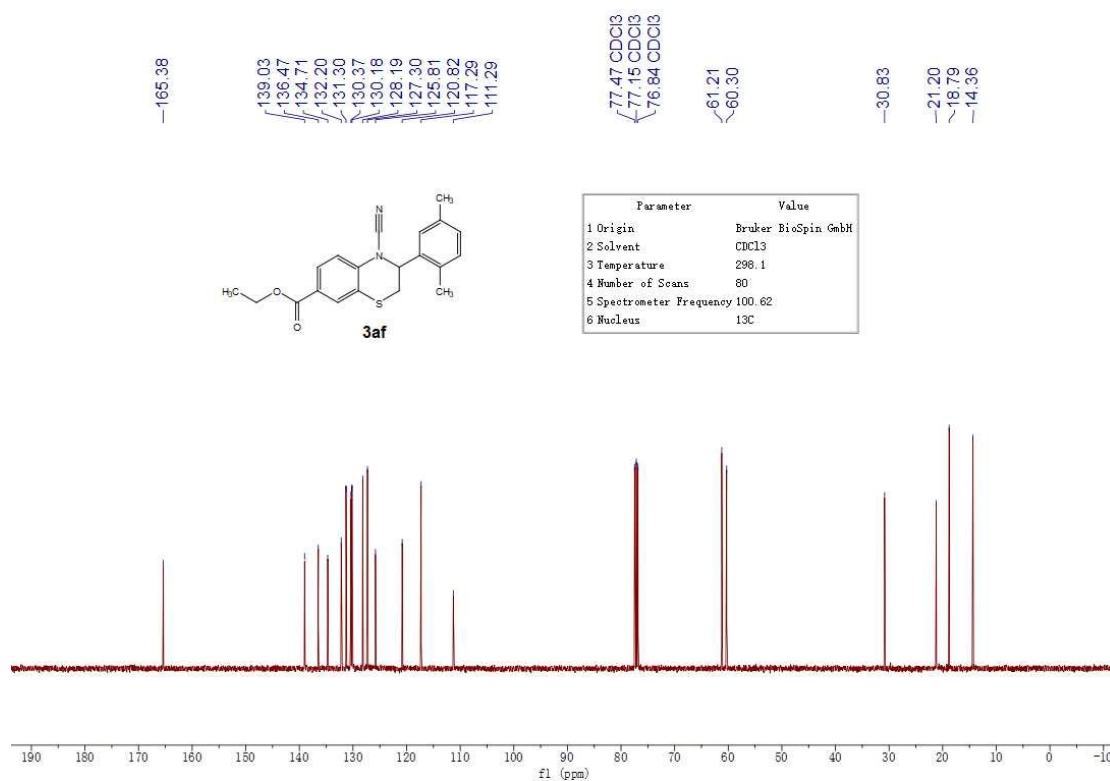

<sup>13</sup>C NMR spectrum of **3af** (100 MHz, CDCl<sub>3</sub>)



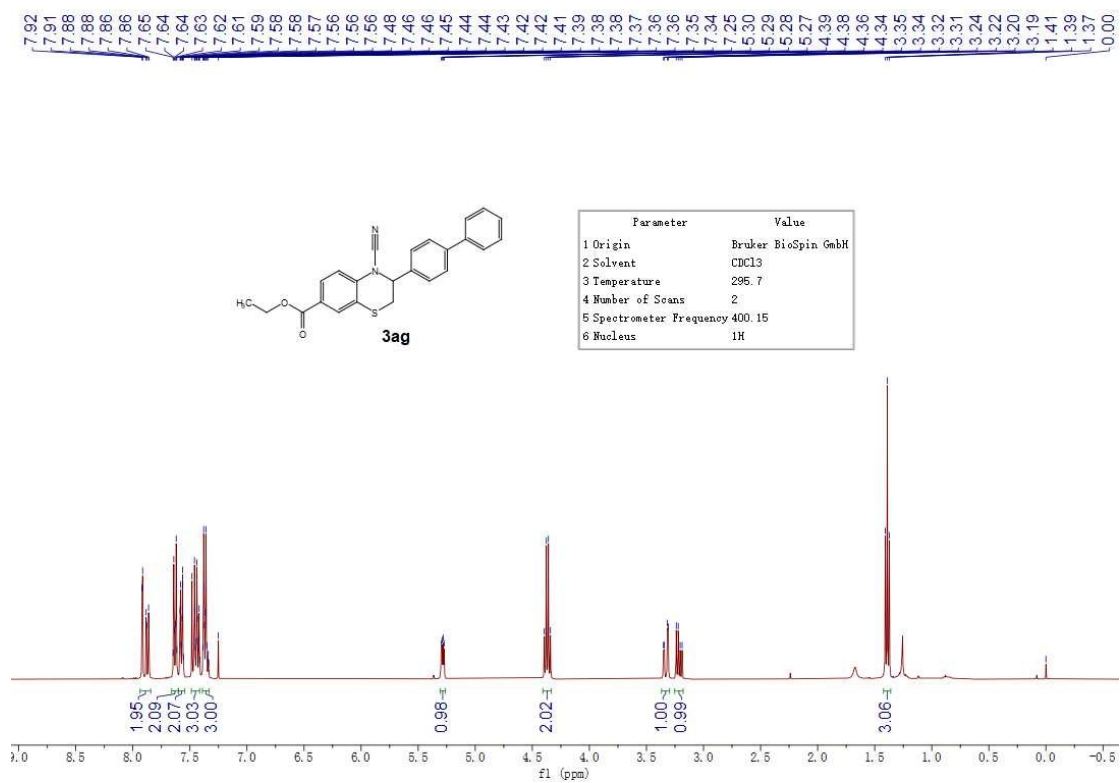

<sup>1</sup>H NMR spectrum of **3ag** (400 MHz, CDCl<sub>3</sub>)

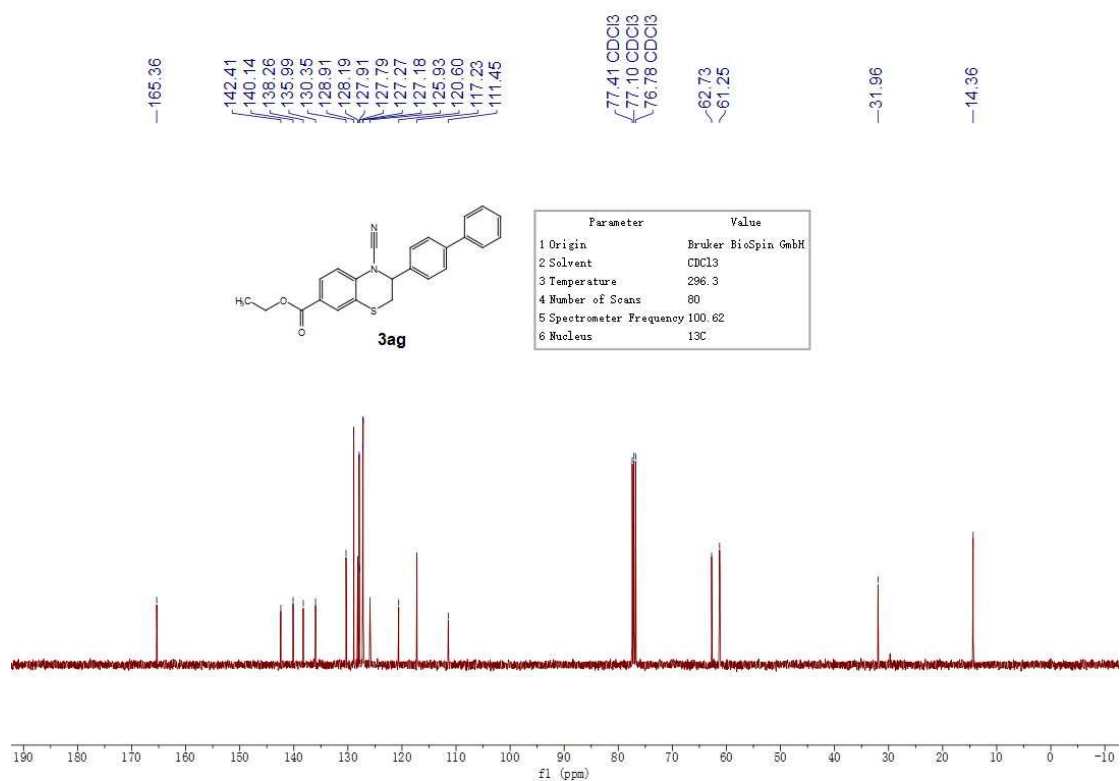

<sup>13</sup>C NMR spectrum of **3ag** (100 MHz, CDCl<sub>3</sub>)

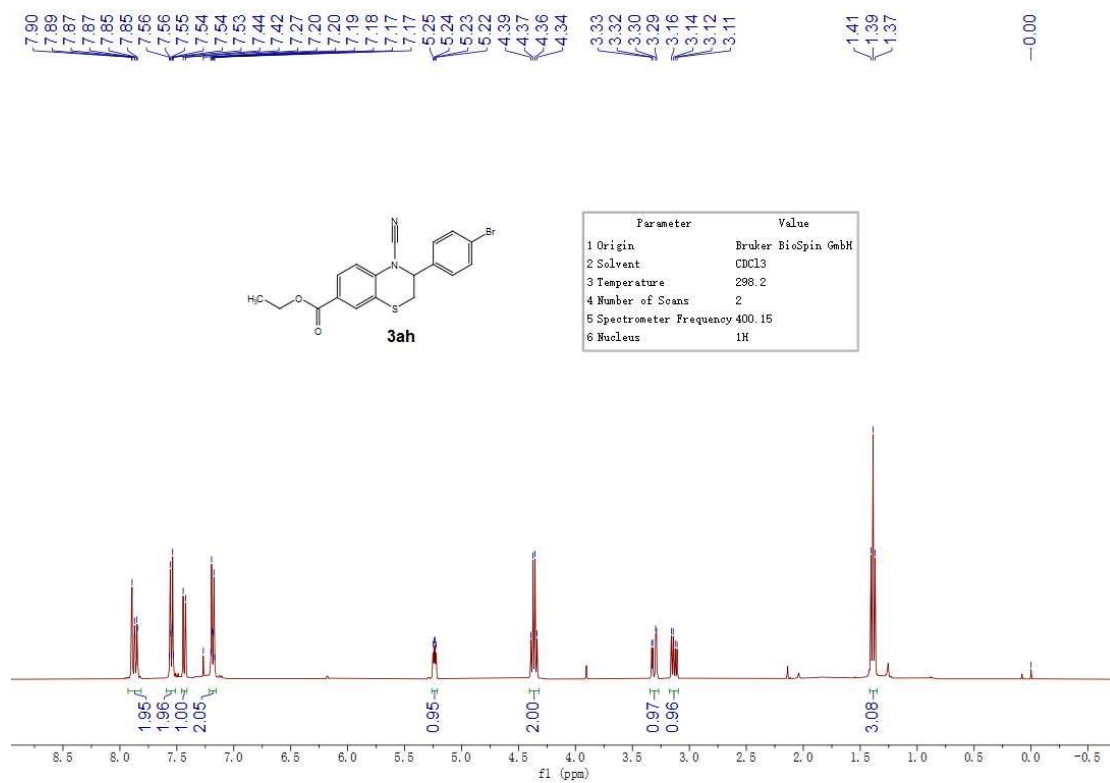

<sup>1</sup>H NMR spectrum of **3ah** (400 MHz, CDCl<sub>3</sub>)

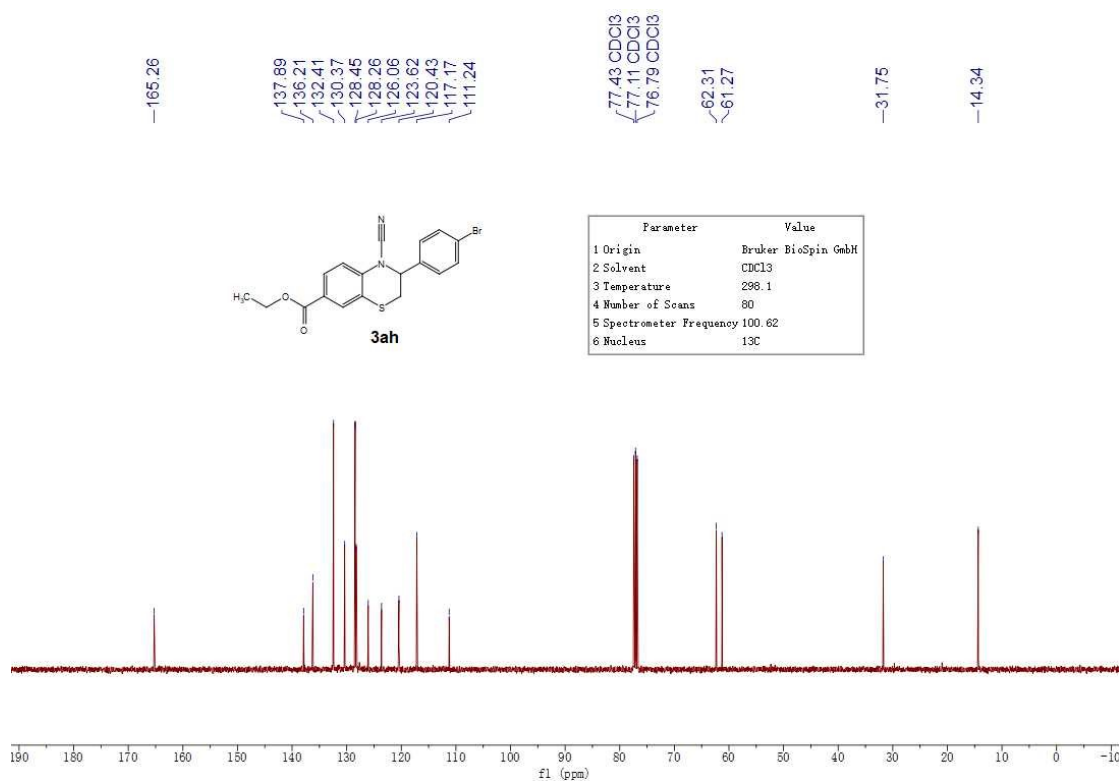

<sup>13</sup>C NMR spectrum of **3ah** (100 MHz, CDCl<sub>3</sub>)

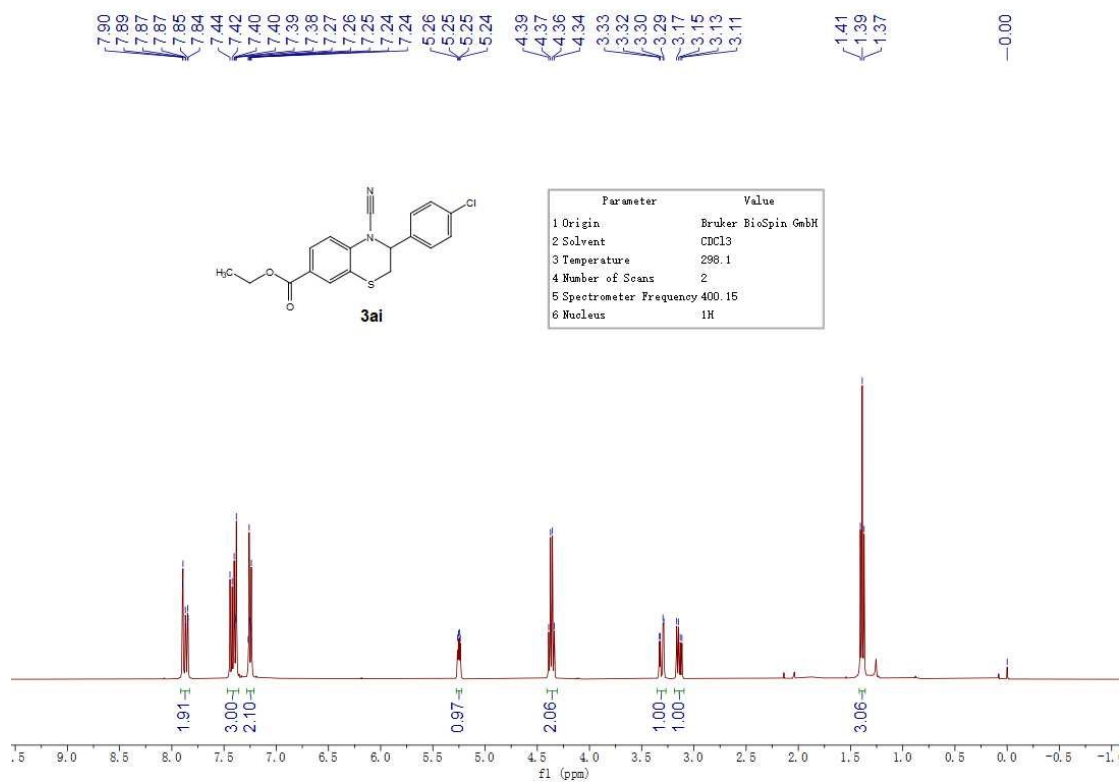

<sup>1</sup>H NMR spectrum of **3ai** (400 MHz, CDCl<sub>3</sub>)

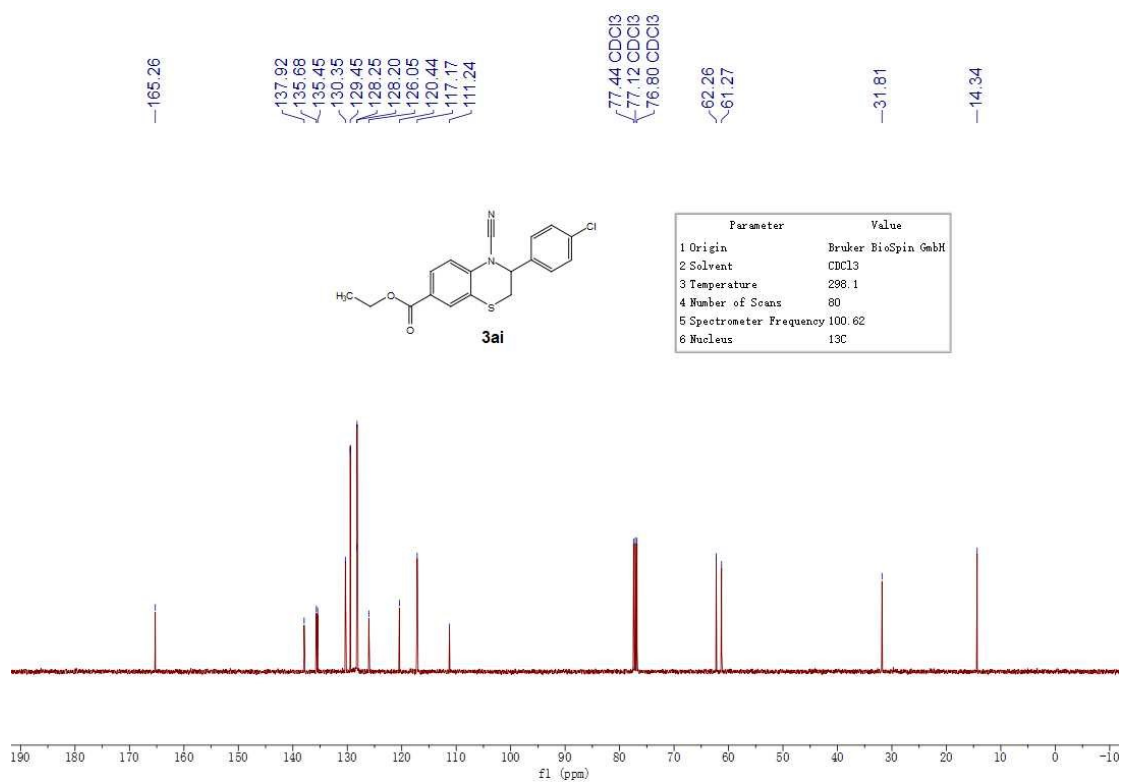

<sup>13</sup>C NMR spectrum of **3ai** (100 MHz, CDCl<sub>3</sub>)

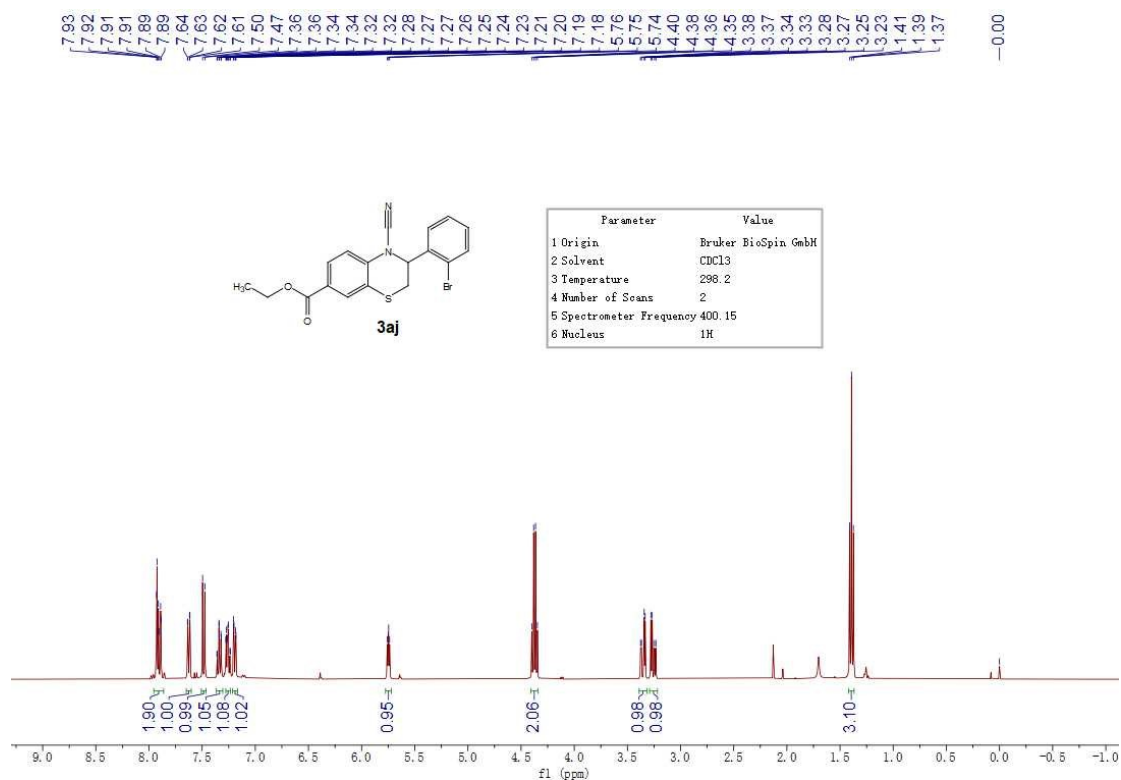

<sup>1</sup>H NMR spectrum of **3aj** (400 MHz, CDCl<sub>3</sub>)

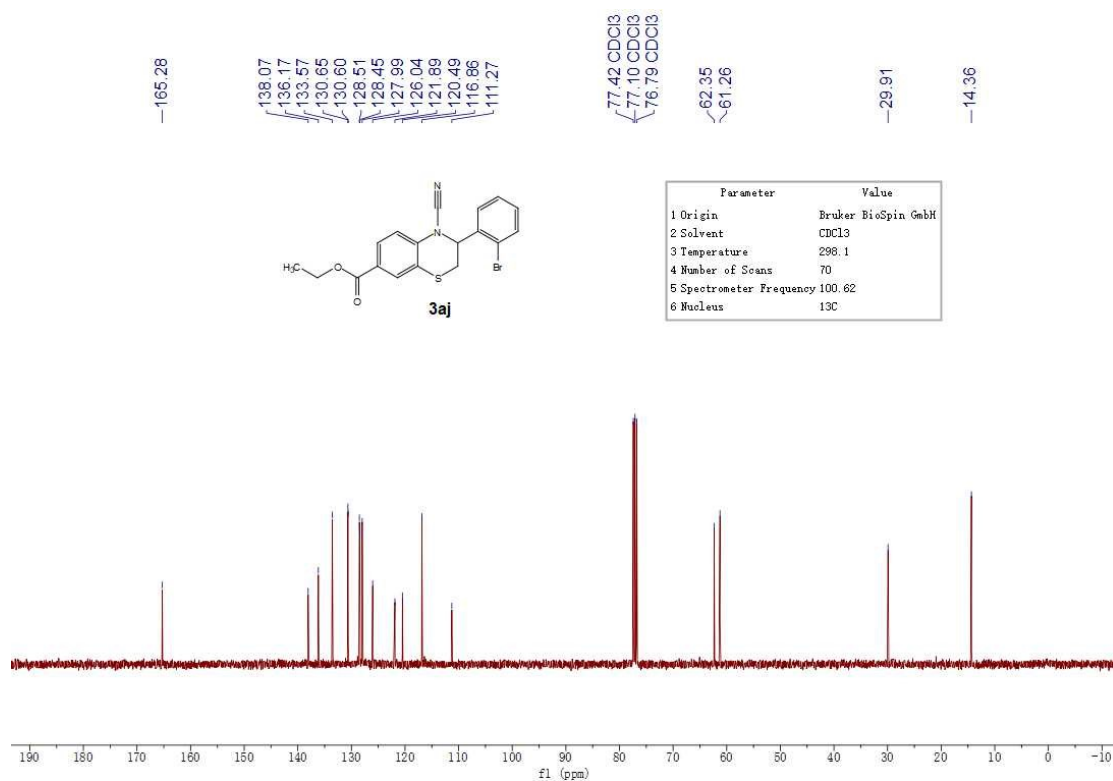

<sup>13</sup>C NMR spectrum of **3aj** (100 MHz, CDCl<sub>3</sub>)

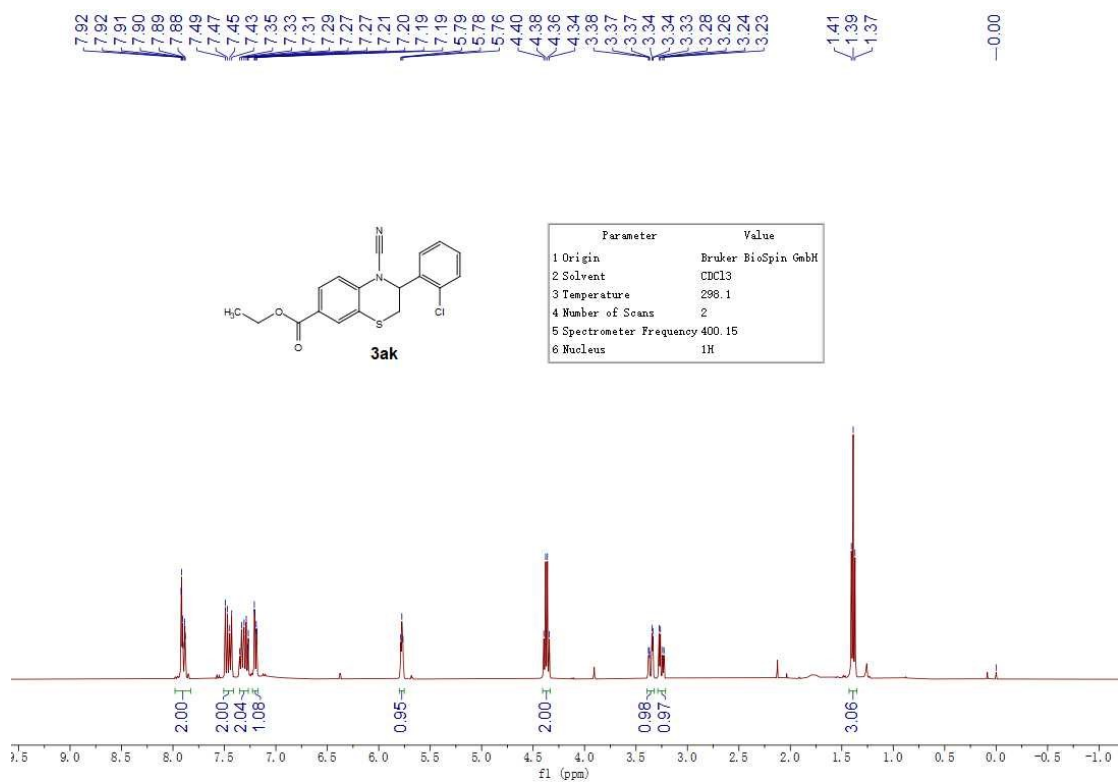

<sup>1</sup>H NMR spectrum of **3ak** (400 MHz, CDCl<sub>3</sub>)

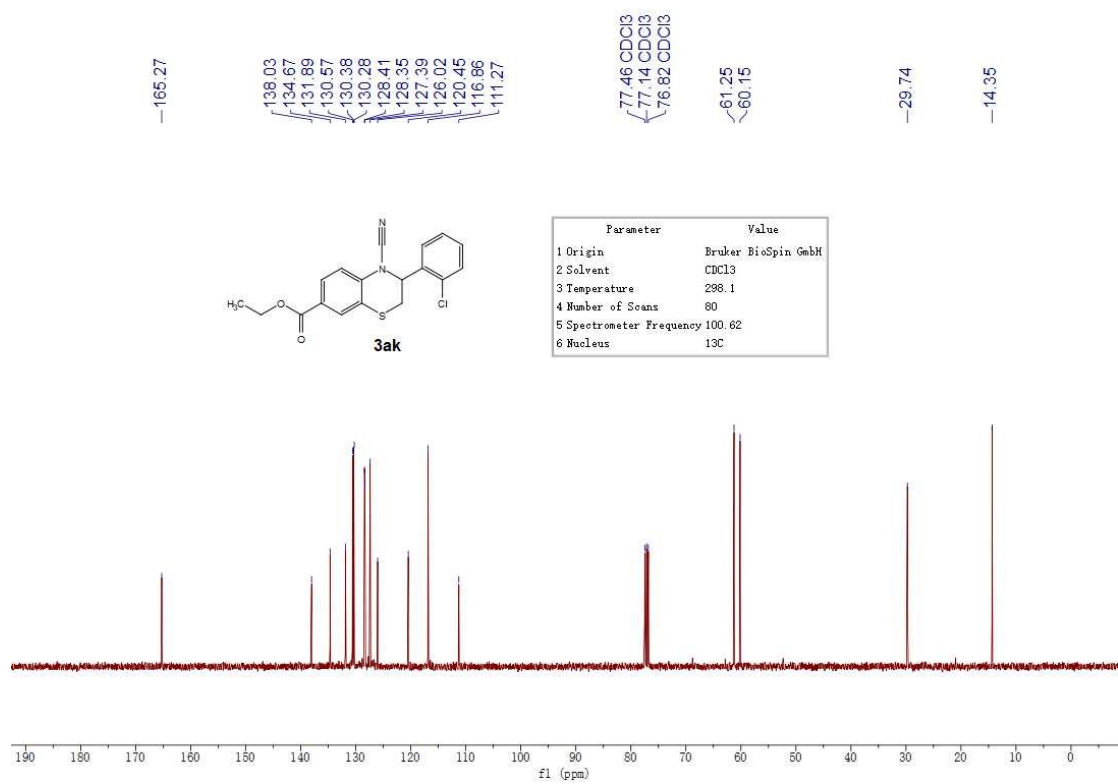

<sup>13</sup>C NMR spectrum of **3ak** (100 MHz, CDCl<sub>3</sub>)

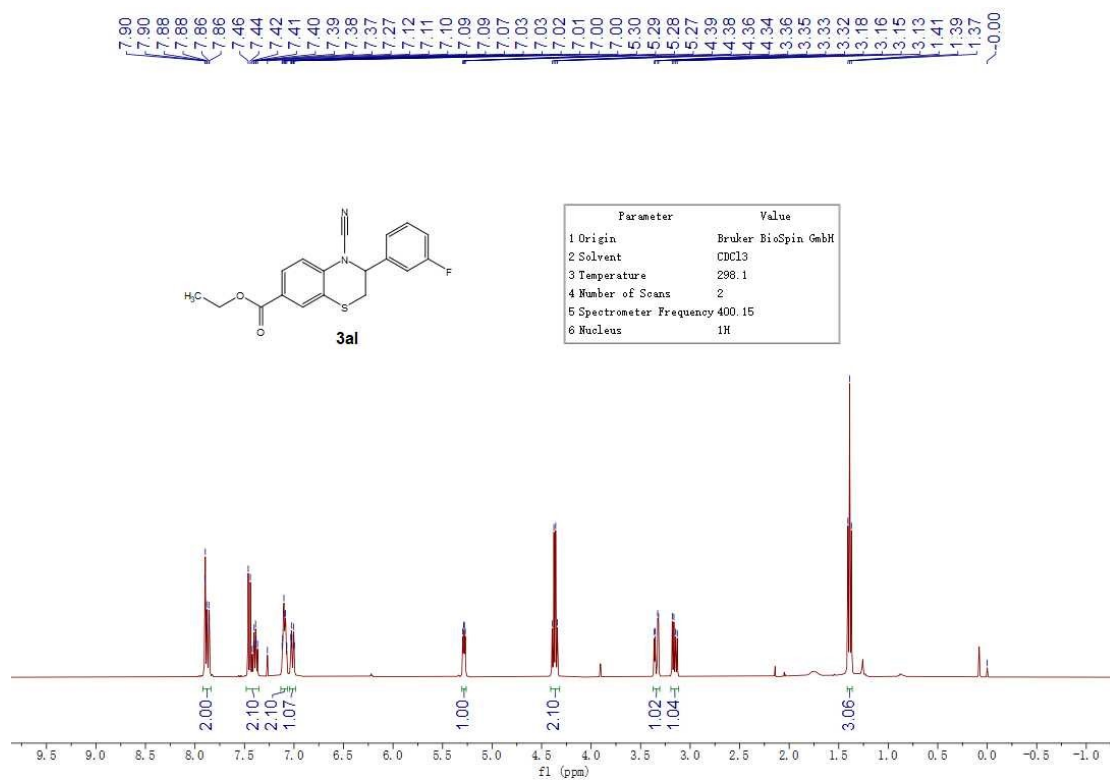

<sup>1</sup>H NMR spectrum of **3al** (400 MHz, CDCl<sub>3</sub>)

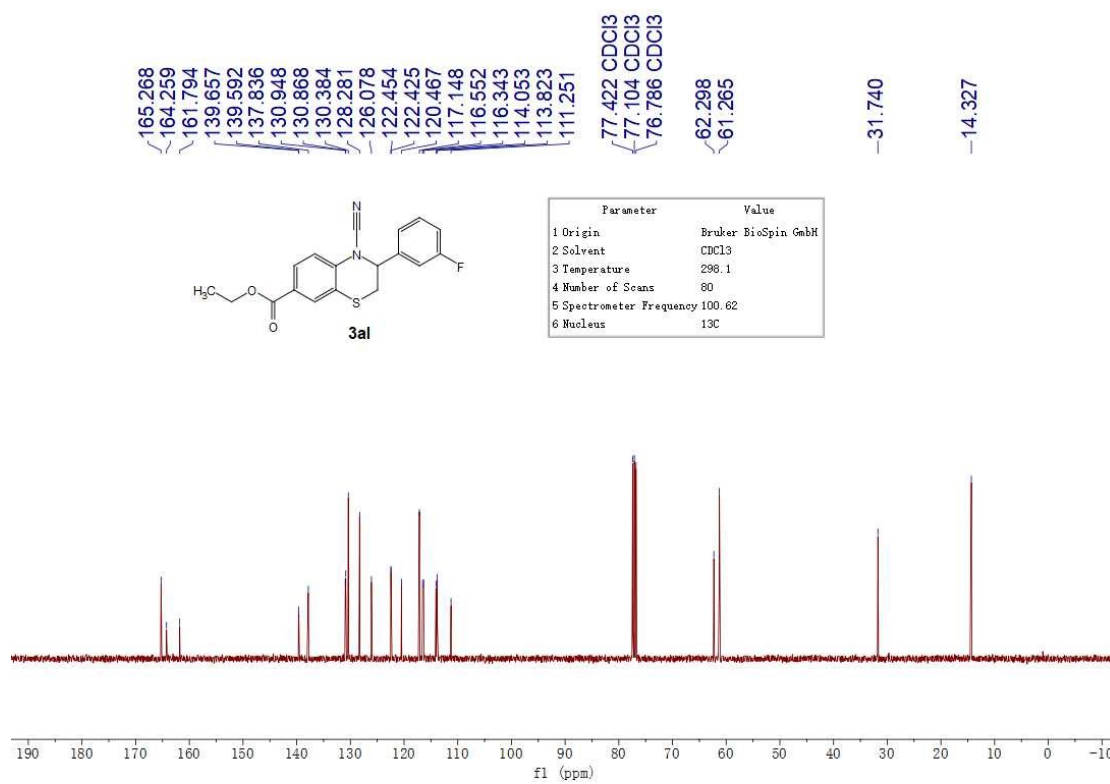

<sup>13</sup>C NMR spectrum of **3al** (100 MHz, CDCl<sub>3</sub>)

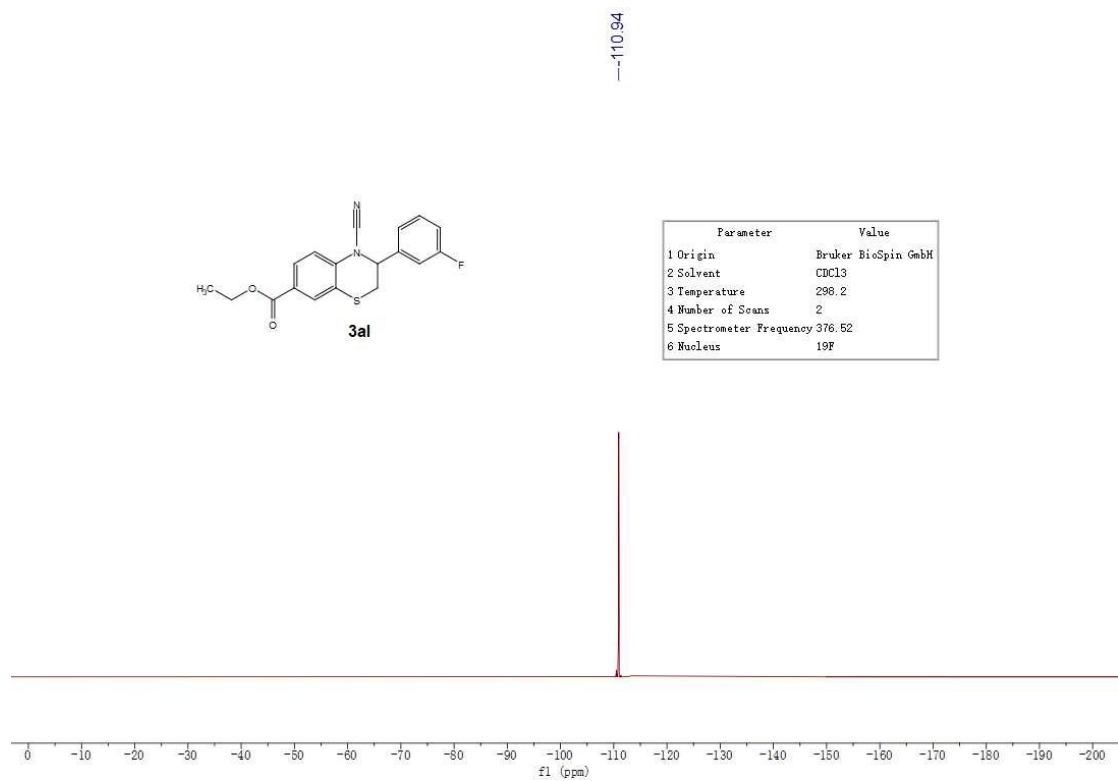

<sup>19</sup>F NMR spectrum of **3al** (376 MHz, CDCl<sub>3</sub>)

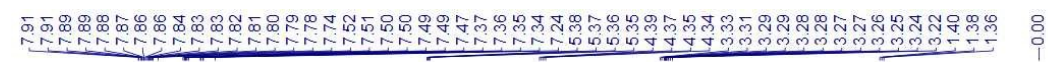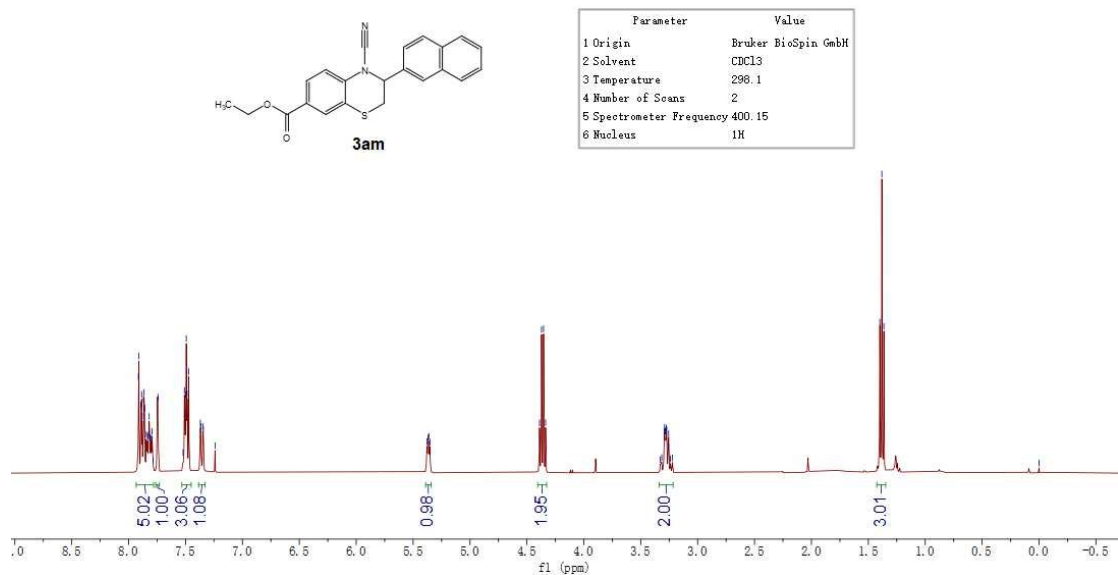

<sup>1</sup>H NMR spectrum of **3am** (400 MHz, CDCl<sub>3</sub>)

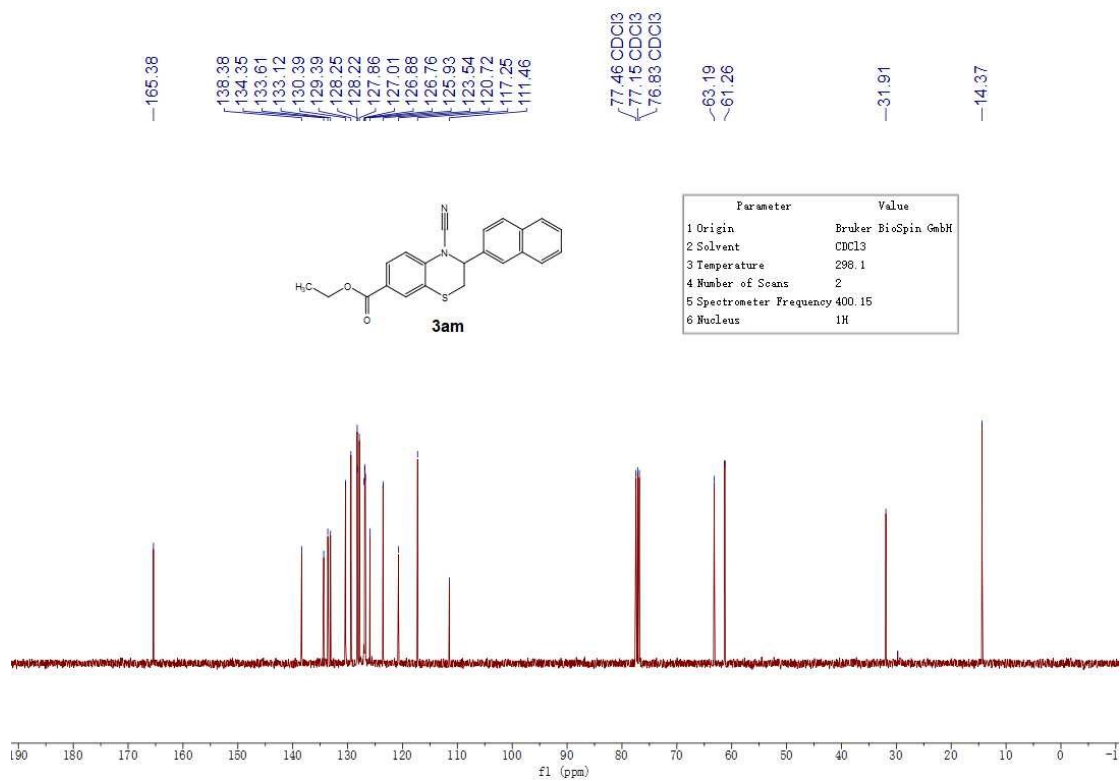

<sup>13</sup>C NMR spectrum of **3am** (100 MHz, CDCl<sub>3</sub>)

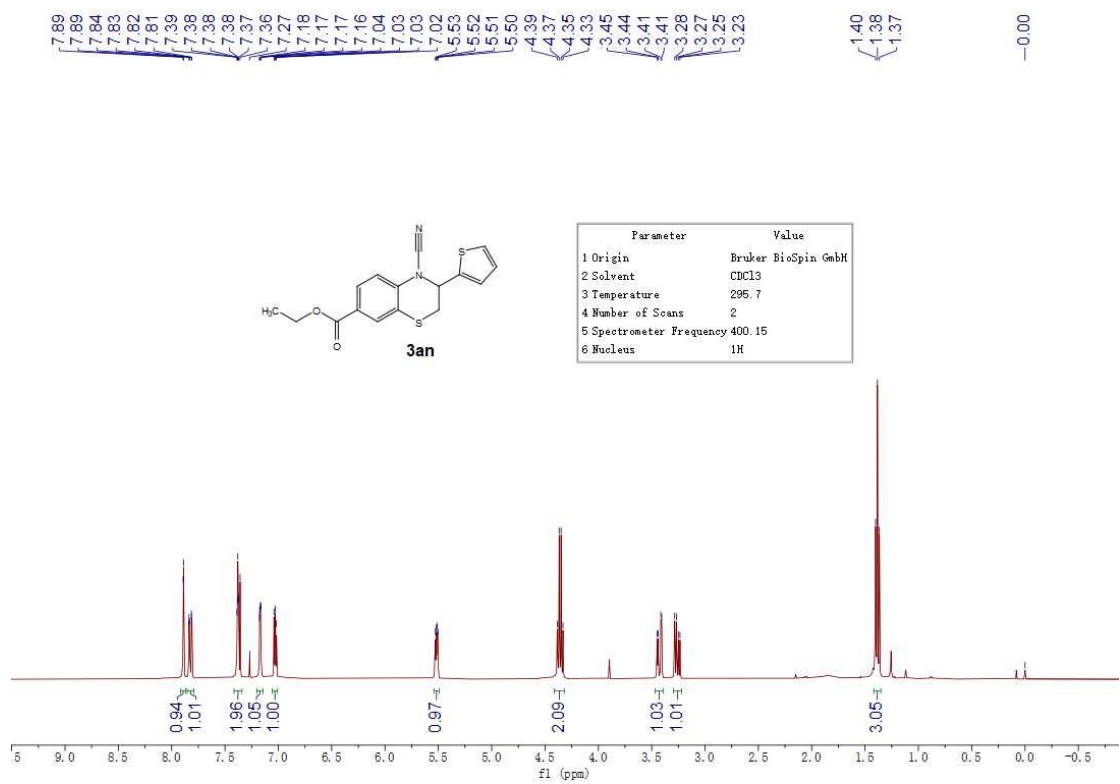

<sup>1</sup>H NMR spectrum of **3an** (400 MHz, CDCl<sub>3</sub>)



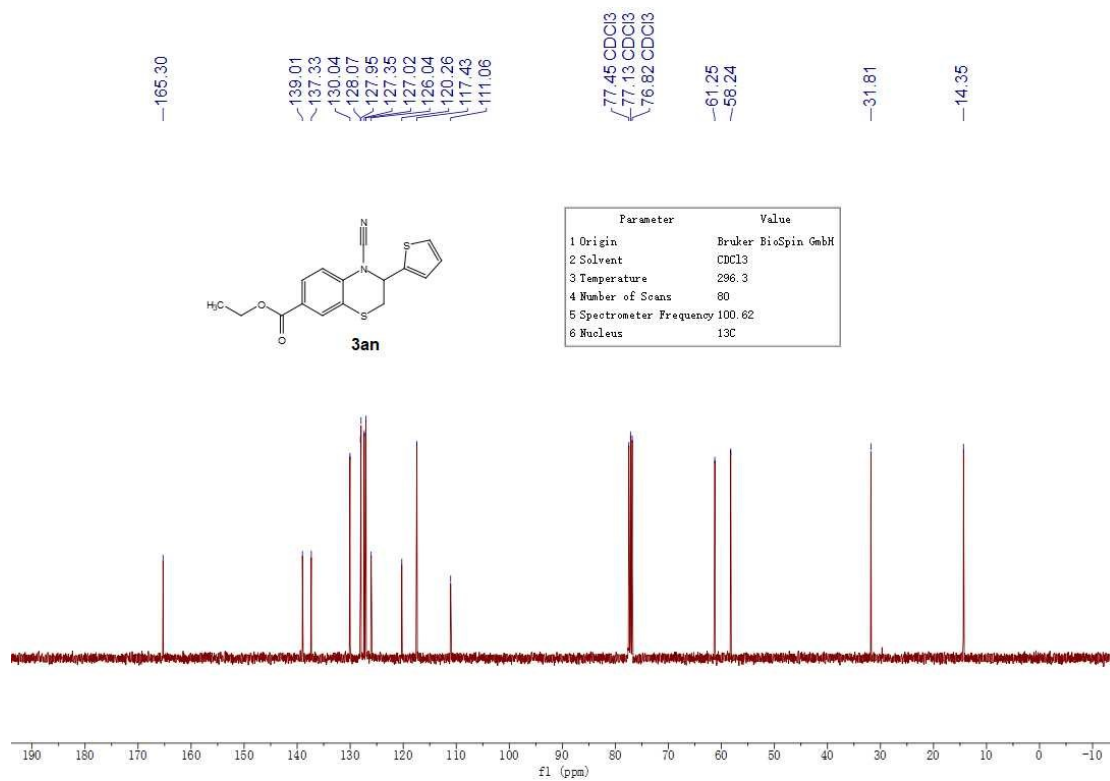

**<sup>13</sup>C NMR spectrum of 3an (100 MHz, CDCl<sub>3</sub>)**

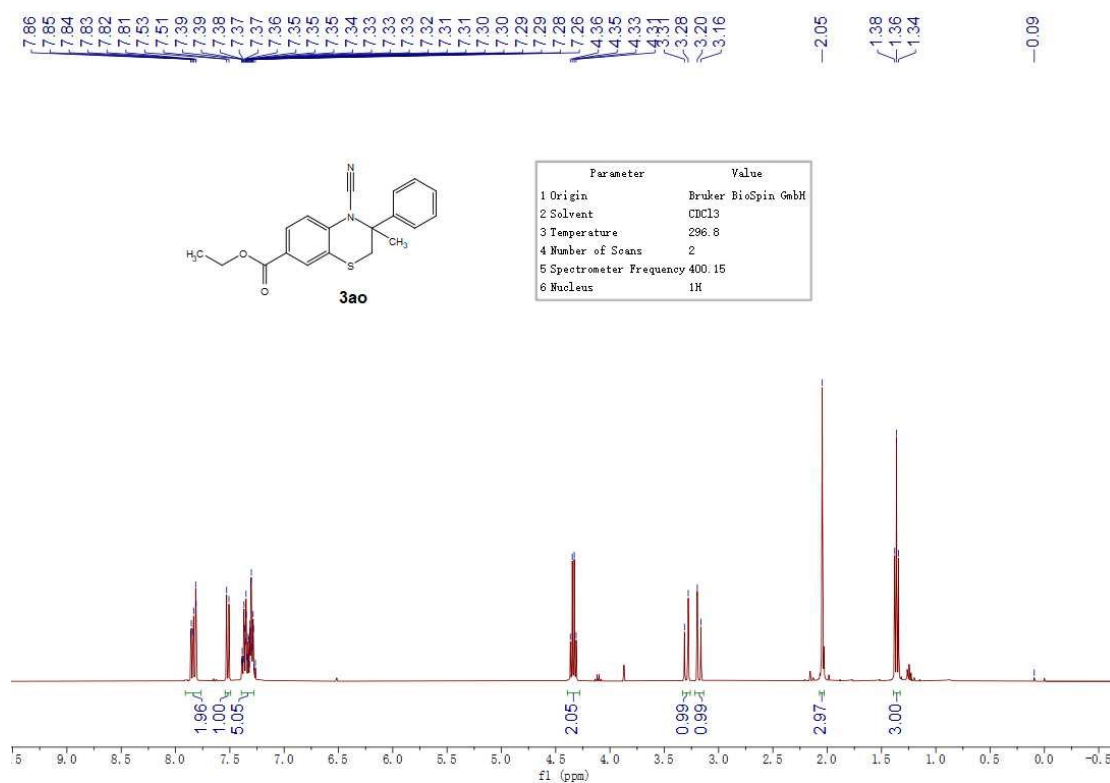

**<sup>1</sup>H NMR spectrum of 3ao (400 MHz, CDCl<sub>3</sub>)**

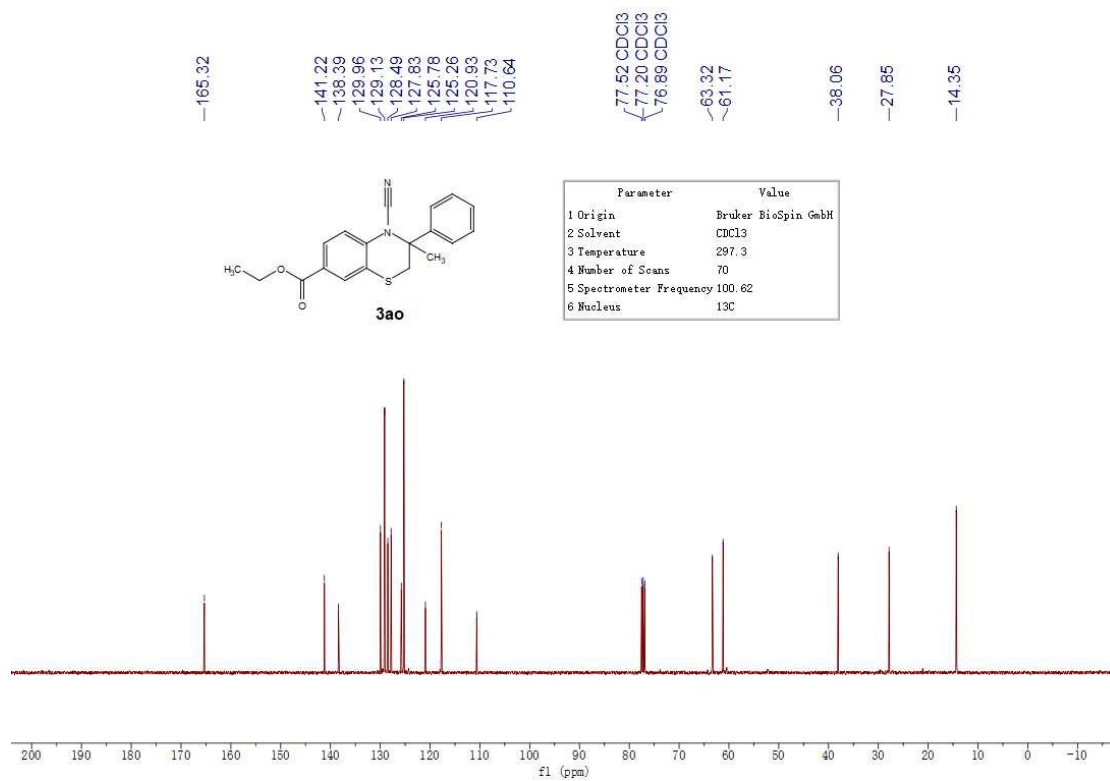

**13C NMR spectrum of 3ao (100 MHz, CDCl<sub>3</sub>)**

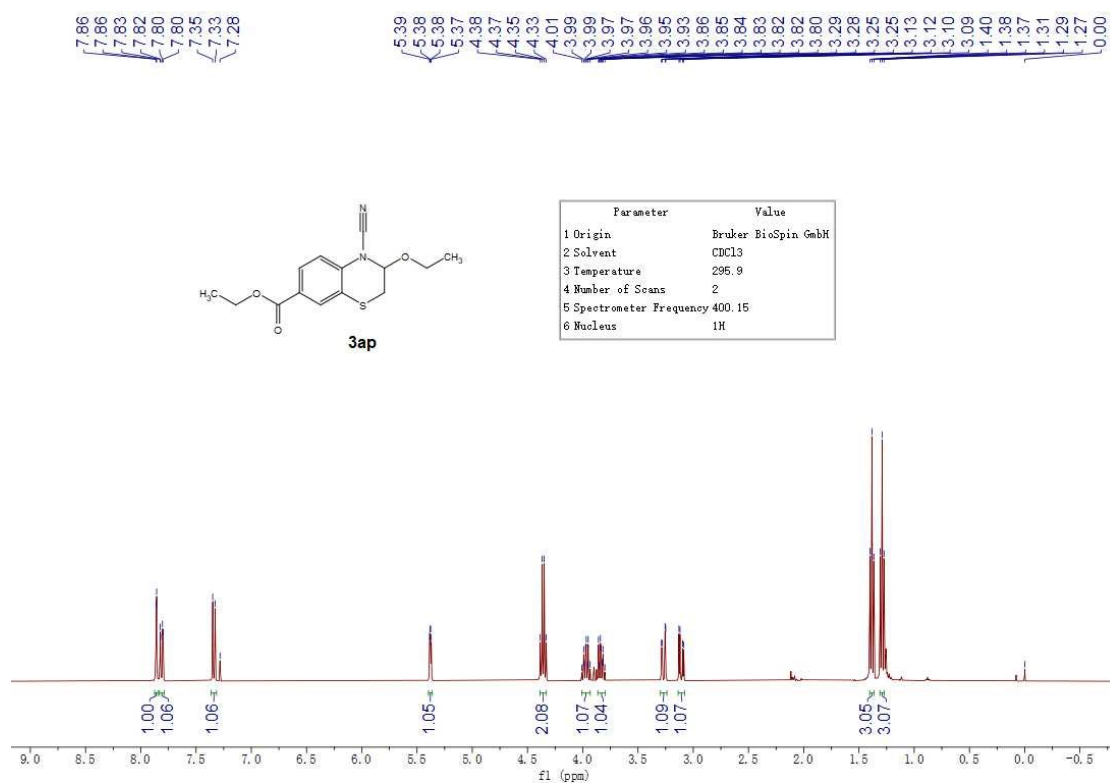

**1H NMR spectrum of 3ap (400 MHz, CDCl<sub>3</sub>)**

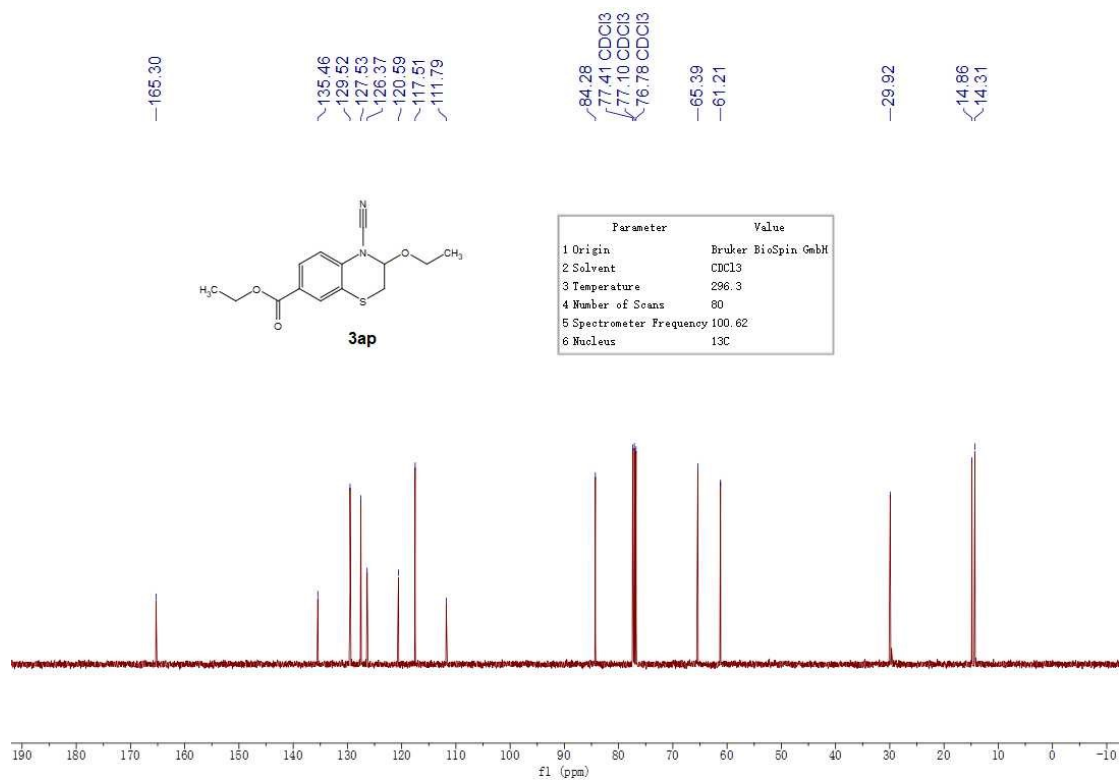

<sup>13</sup>C NMR spectrum of **3ap** (100 MHz, CDCl<sub>3</sub>)

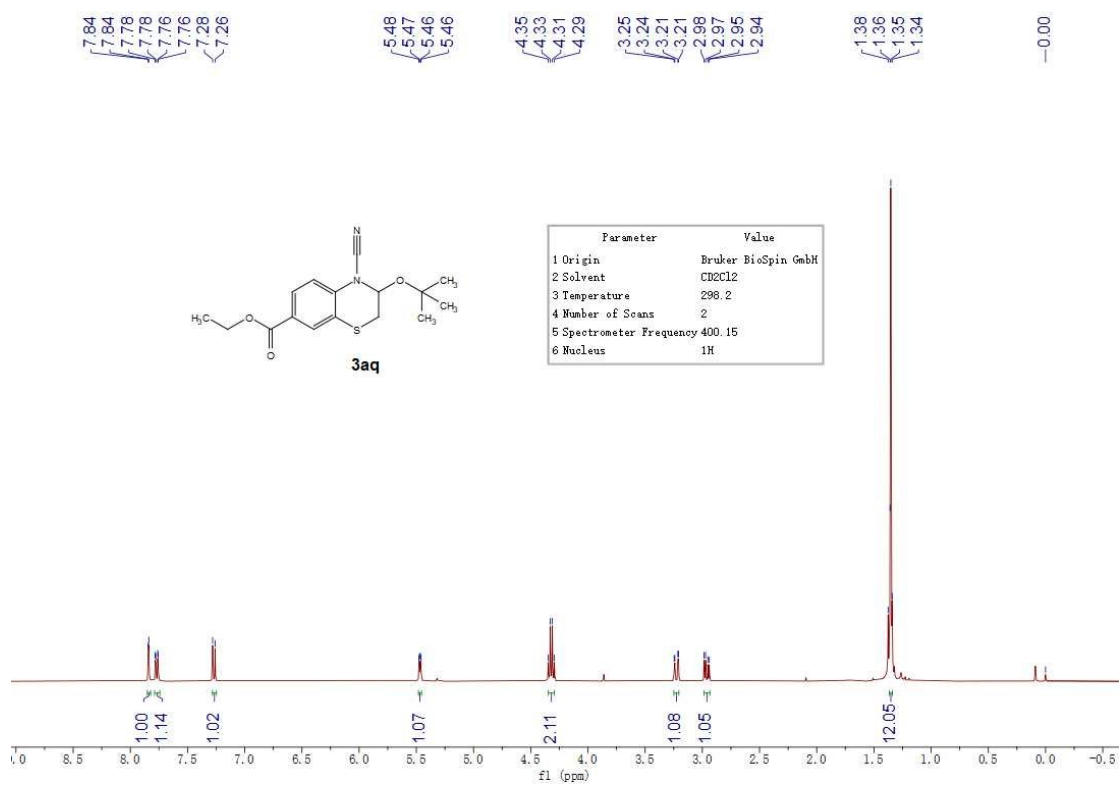

<sup>1</sup>H NMR spectrum of **3aq** (400 MHz, CD<sub>2</sub>Cl<sub>2</sub>)

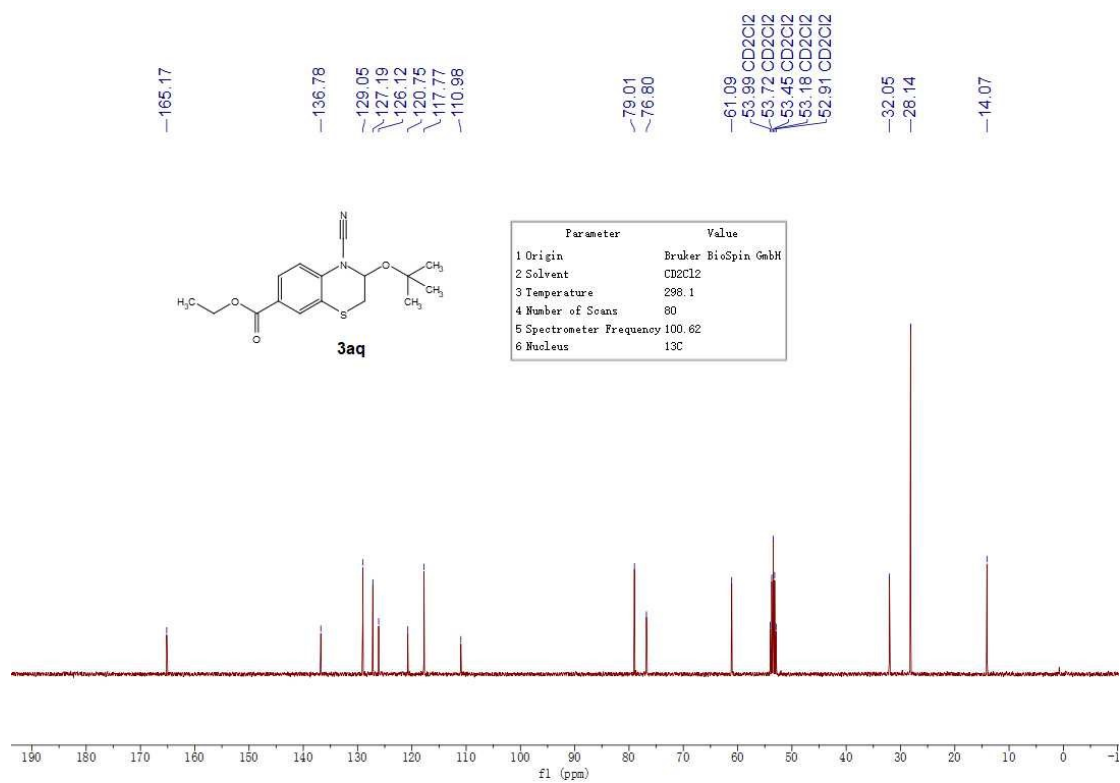

<sup>13</sup>C NMR spectrum of **3aq** (100 MHz, CD<sub>2</sub>Cl<sub>2</sub>)

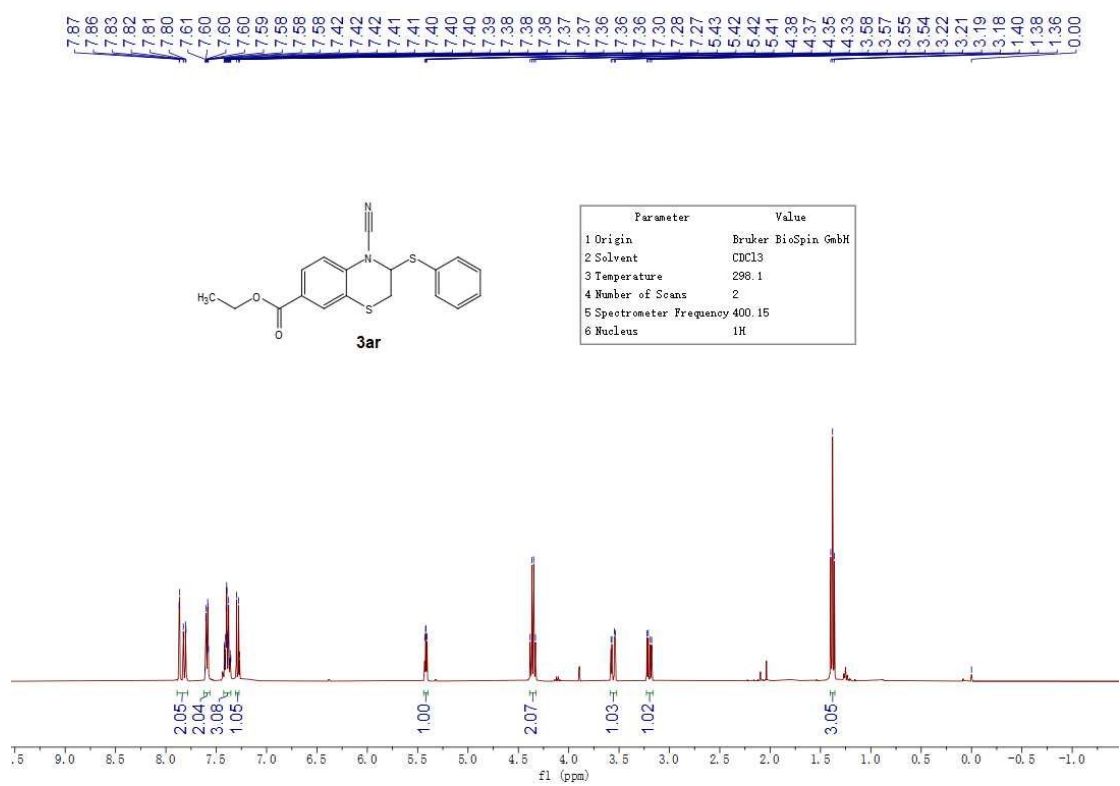

<sup>1</sup>H NMR spectrum of **3ar** (400 MHz, CDCl<sub>3</sub>)

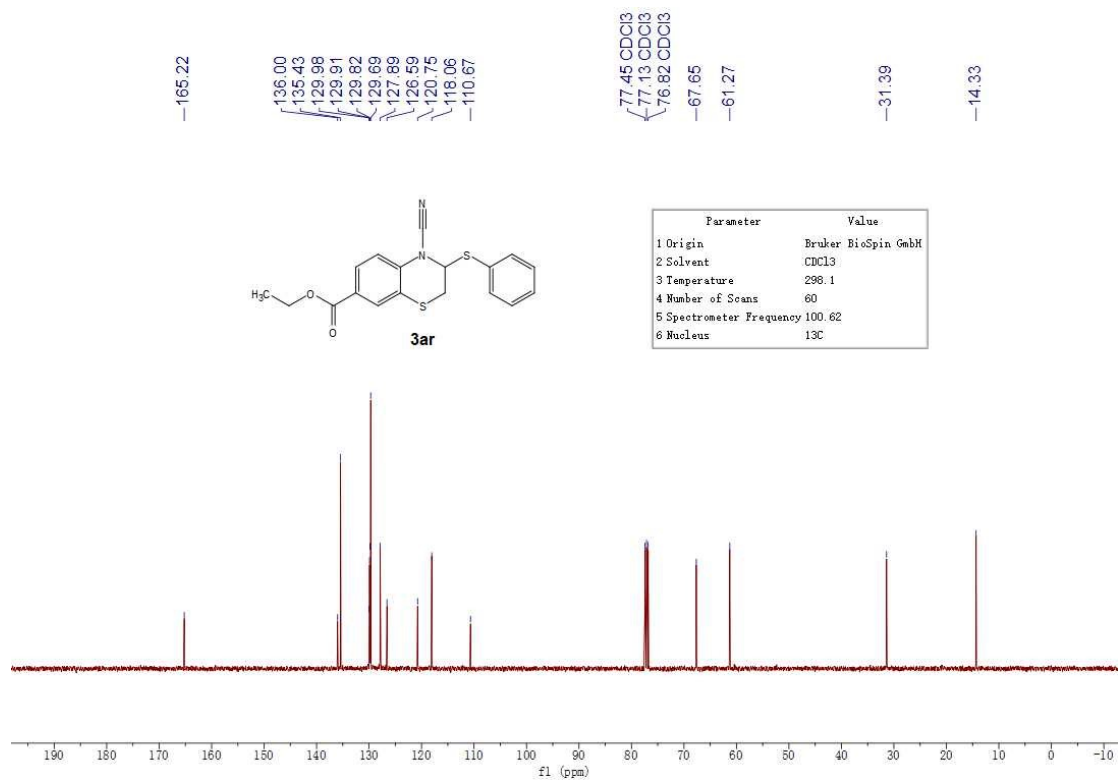

$^{13}\text{C}$  NMR spectrum of **3ar** (100 MHz,  $\text{CDCl}_3$ )

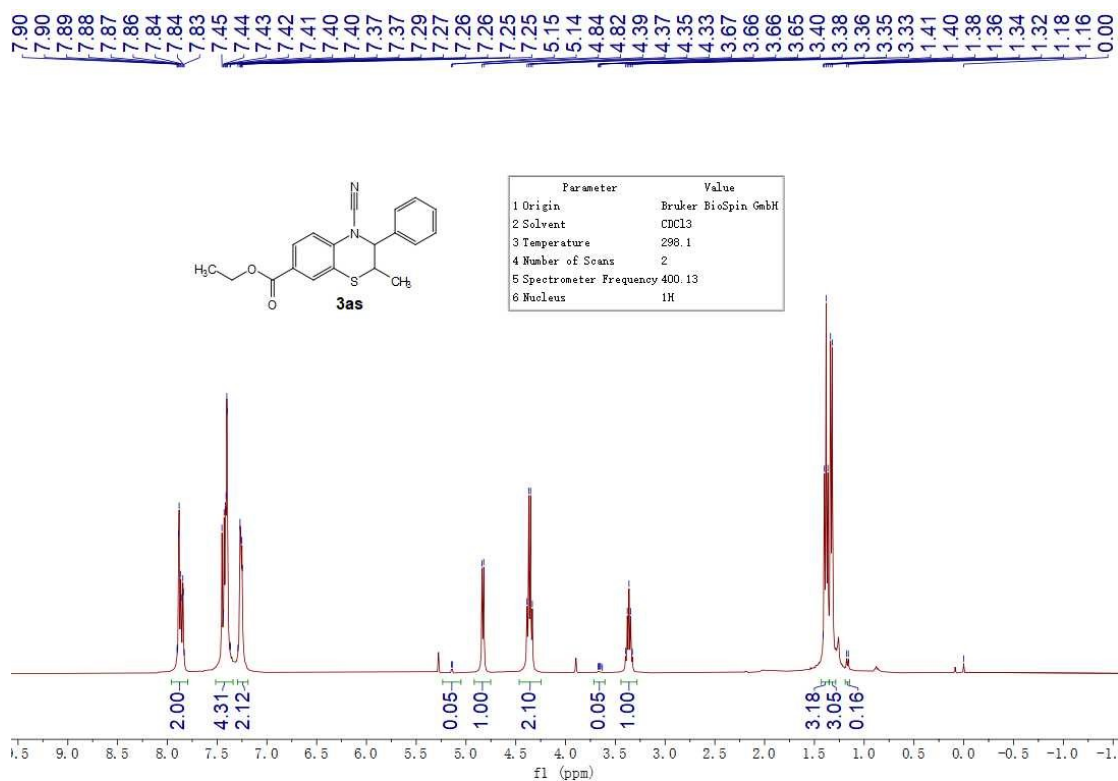

$^1\text{H}$  NMR spectrum of **3as** (400 MHz,  $\text{CDCl}_3$ )

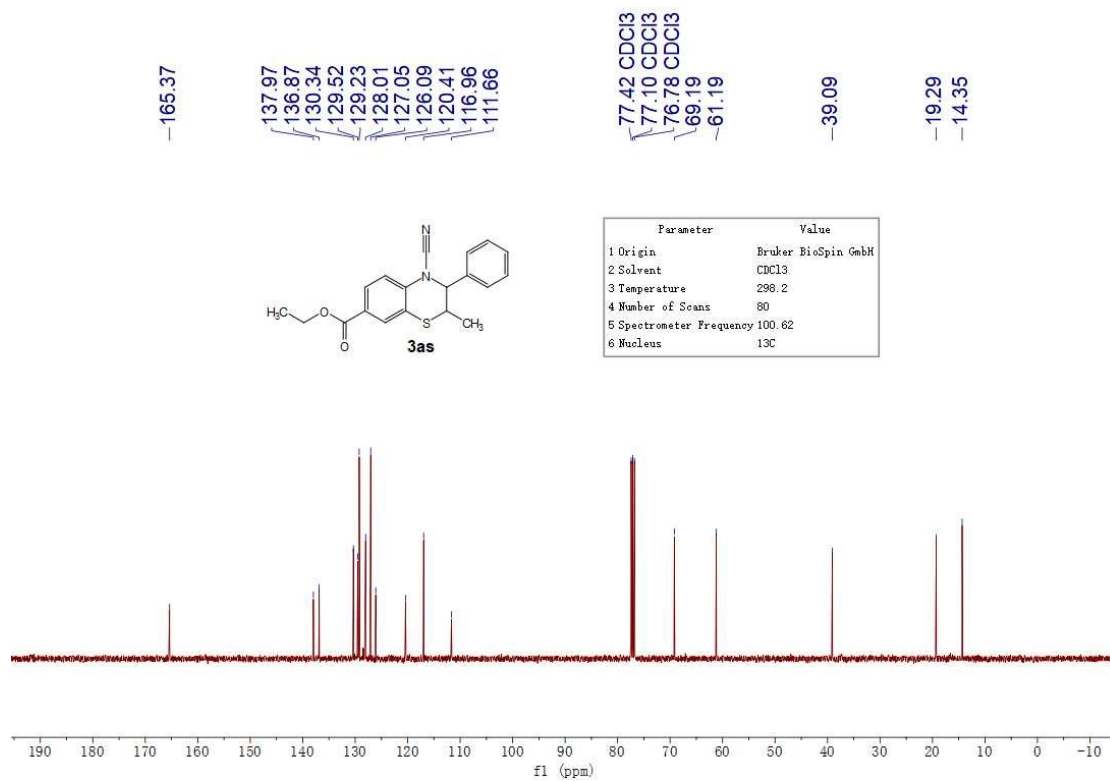

**<sup>13</sup>C NMR spectrum of 3as (100 MHz, CDCl<sub>3</sub>)**

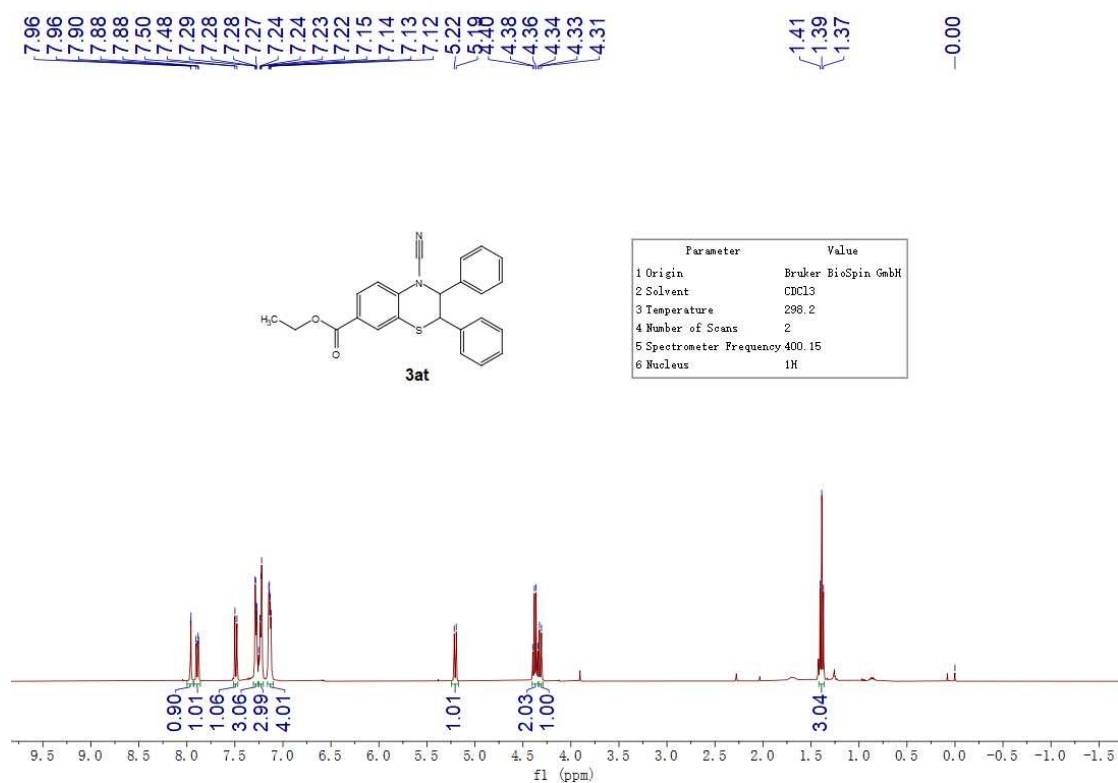

**<sup>1</sup>H NMR spectrum of 3at (400 MHz, CDCl<sub>3</sub>)**

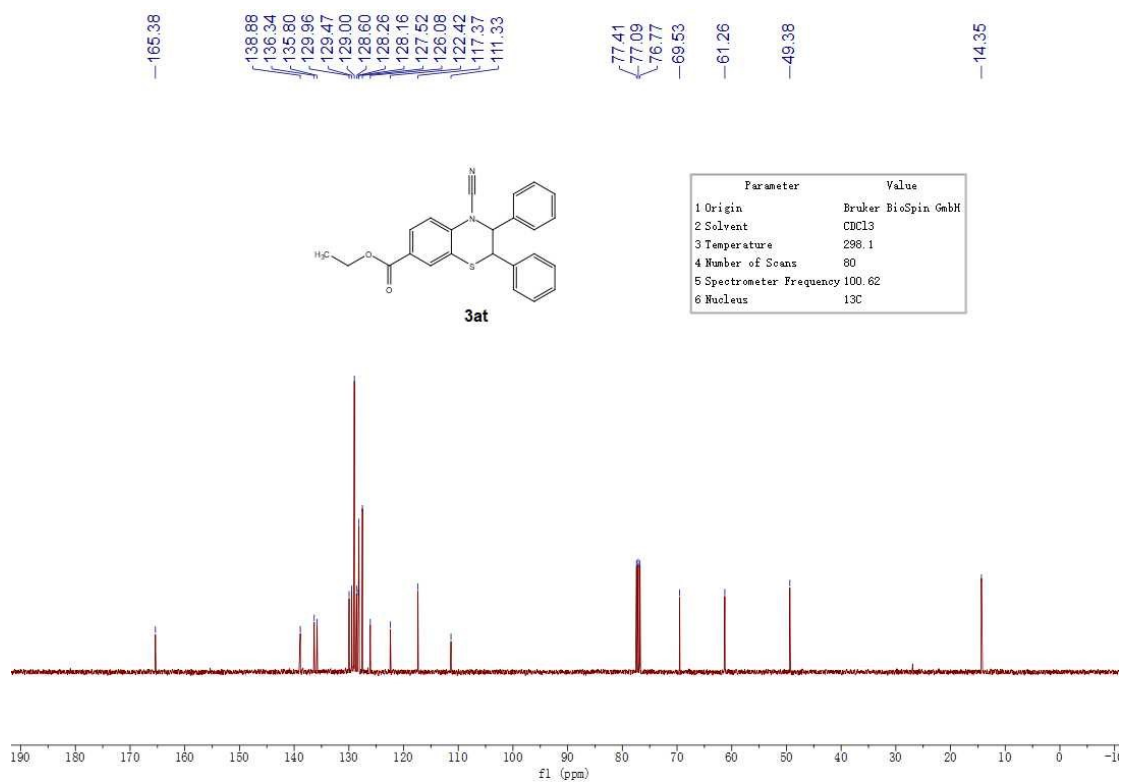

$^{13}\text{C}$  NMR spectrum of **3at** (100 MHz,  $\text{CDCl}_3$ )

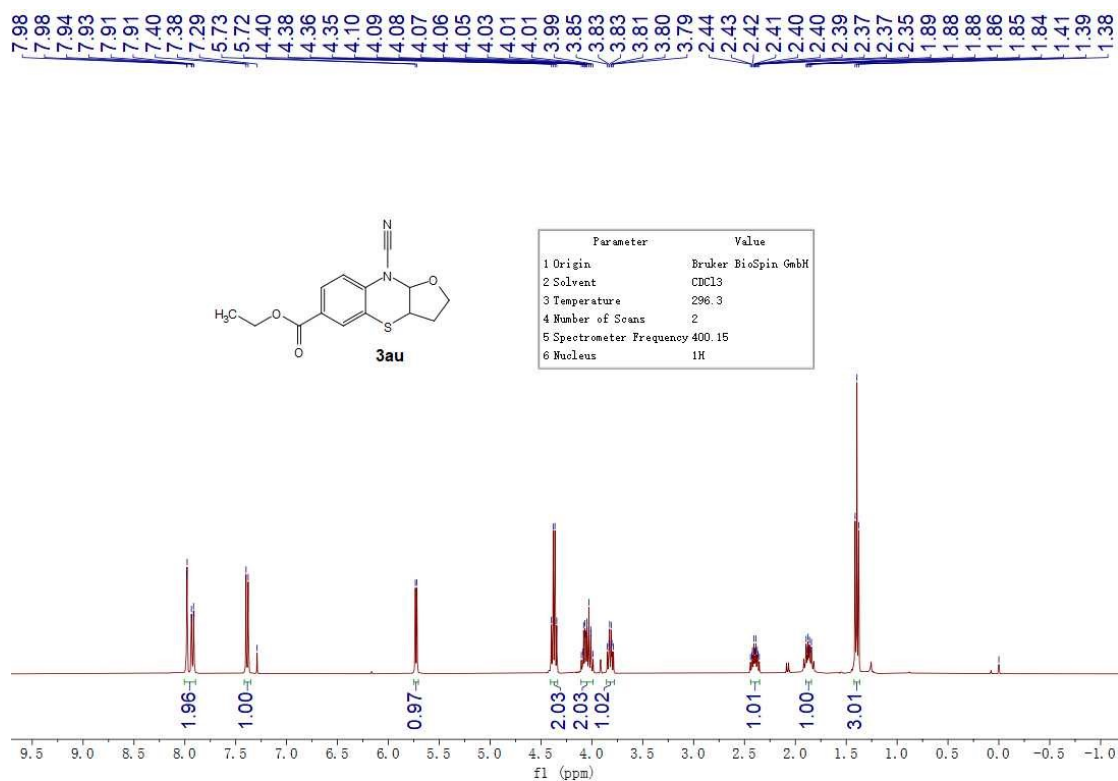

$^1\text{H}$  NMR spectrum of **3au** (400 MHz,  $\text{CDCl}_3$ )

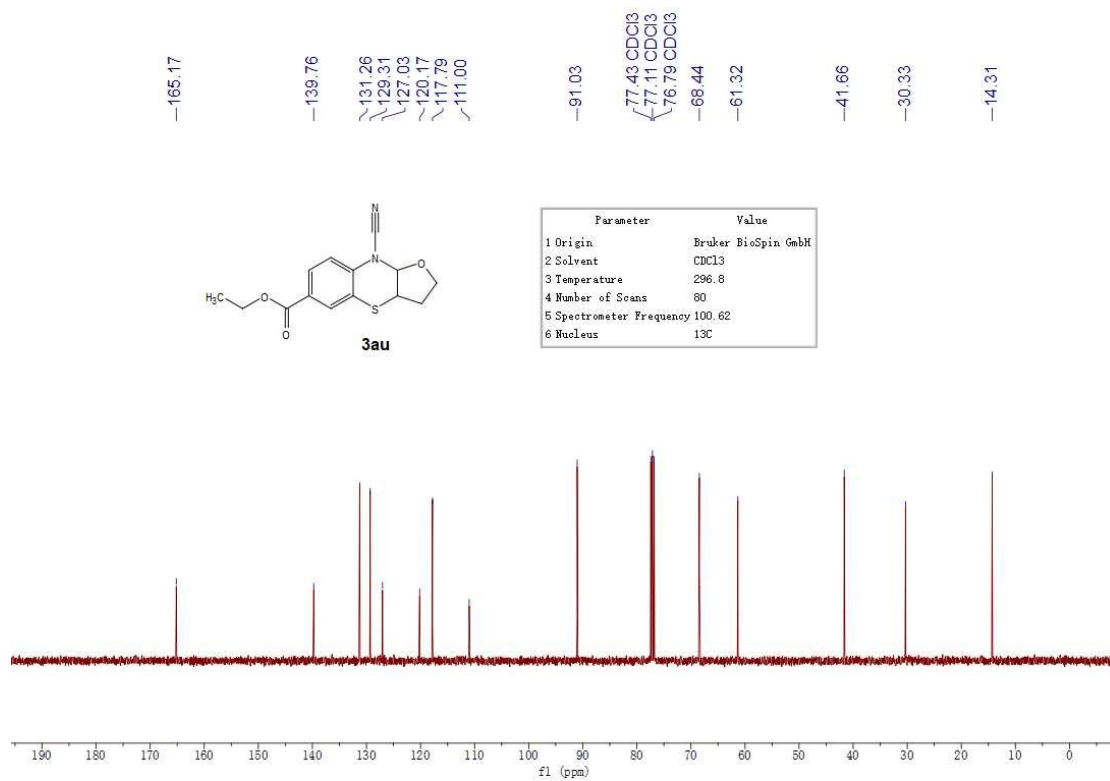

<sup>13</sup>C NMR spectrum of **3au** (100 MHz, CDCl<sub>3</sub>)

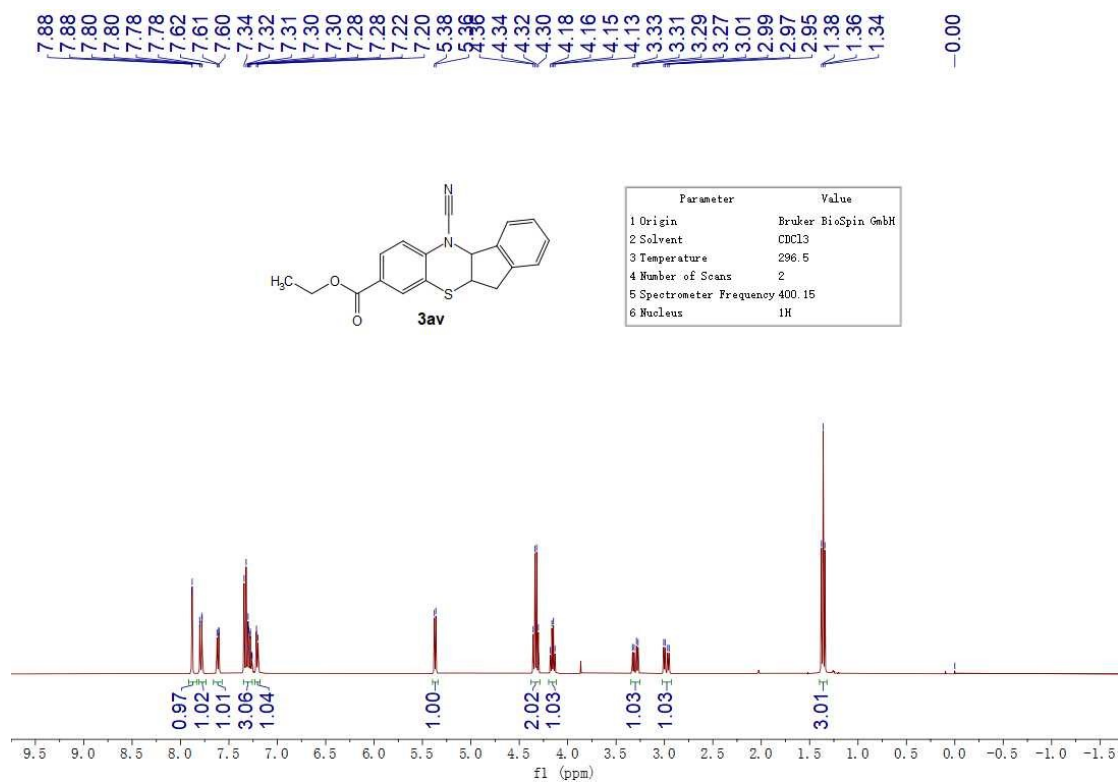

<sup>1</sup>H NMR spectrum of **3av** (400 MHz, CDCl<sub>3</sub>)



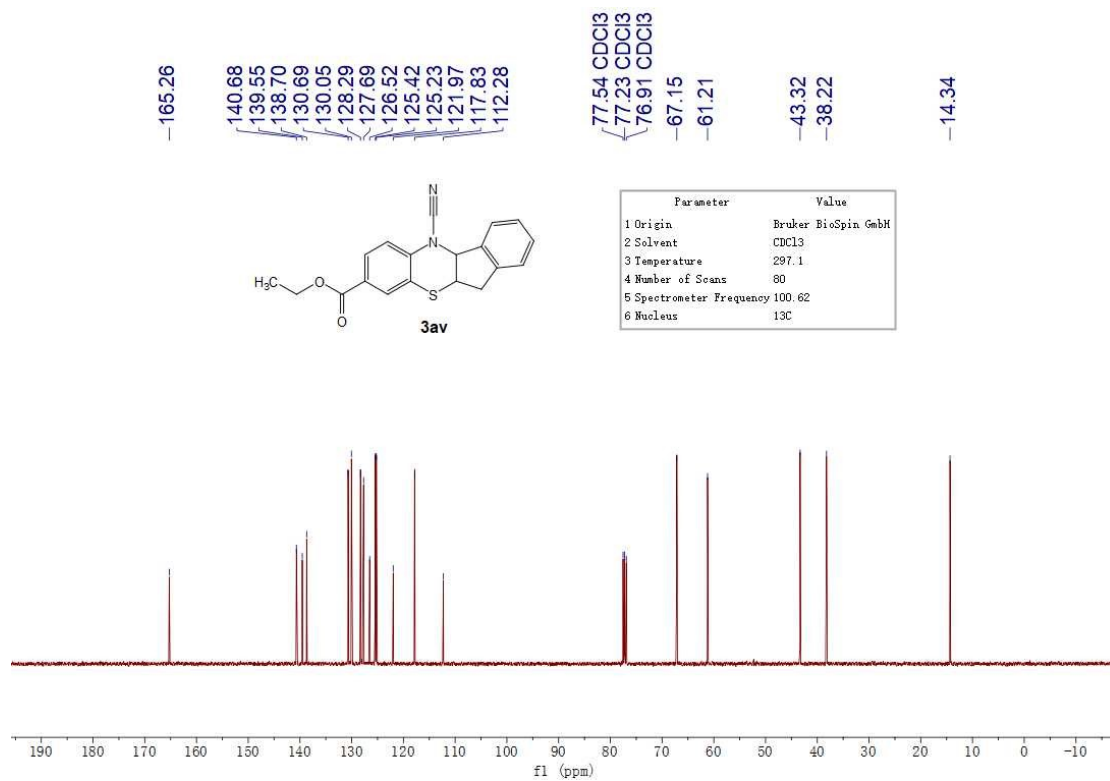

**<sup>13</sup>C NMR spectrum of 3av (100 MHz, CDCl<sub>3</sub>)**

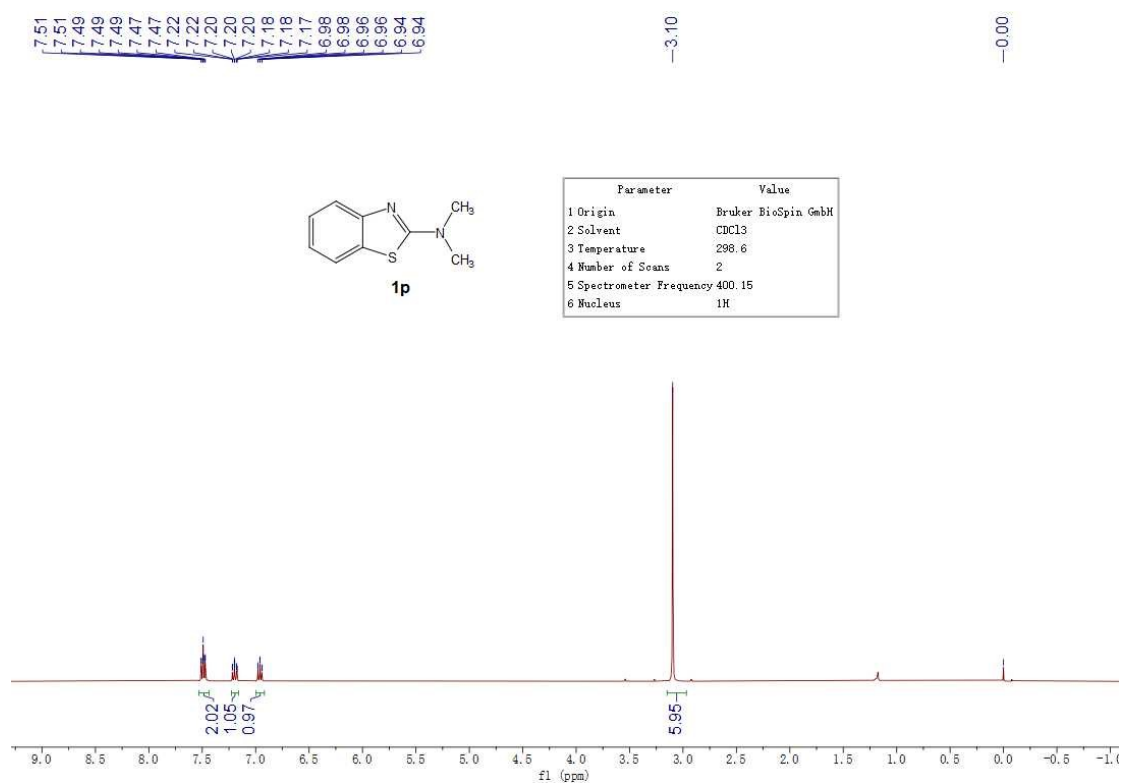

**<sup>1</sup>H NMR spectrum of 1p (400 MHz, CDCl<sub>3</sub>)**

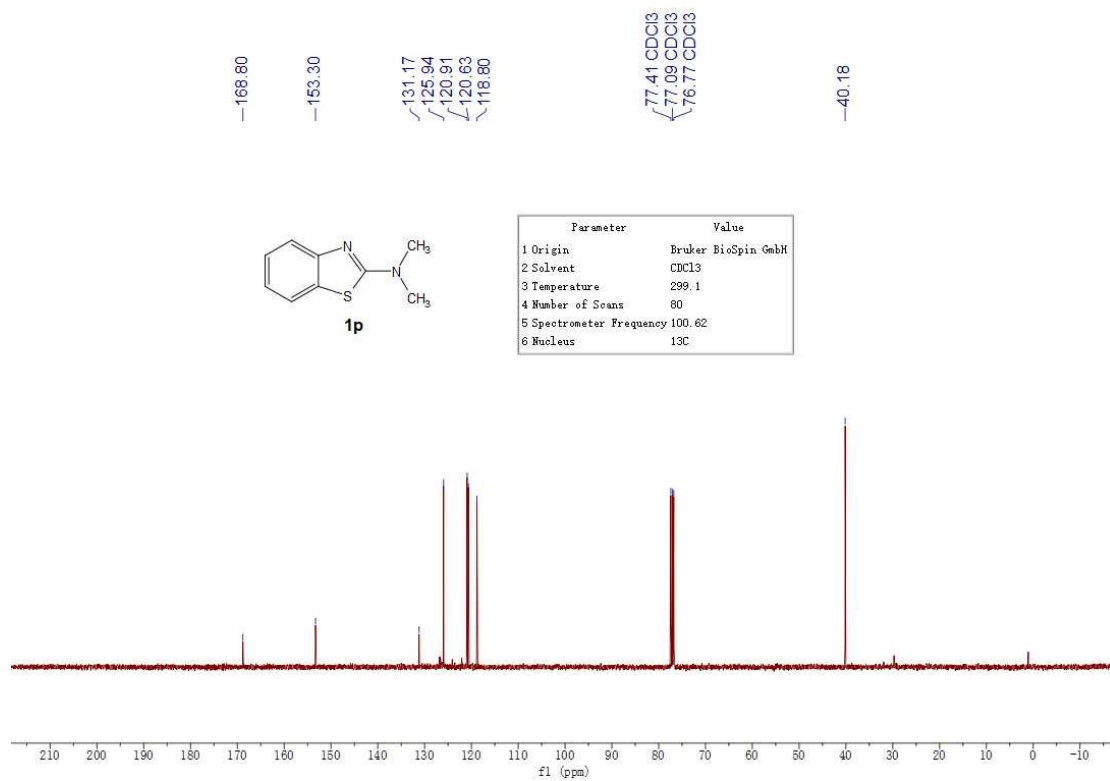

<sup>13</sup>C NMR spectrum of **1p** (100 MHz, CDCl<sub>3</sub>)

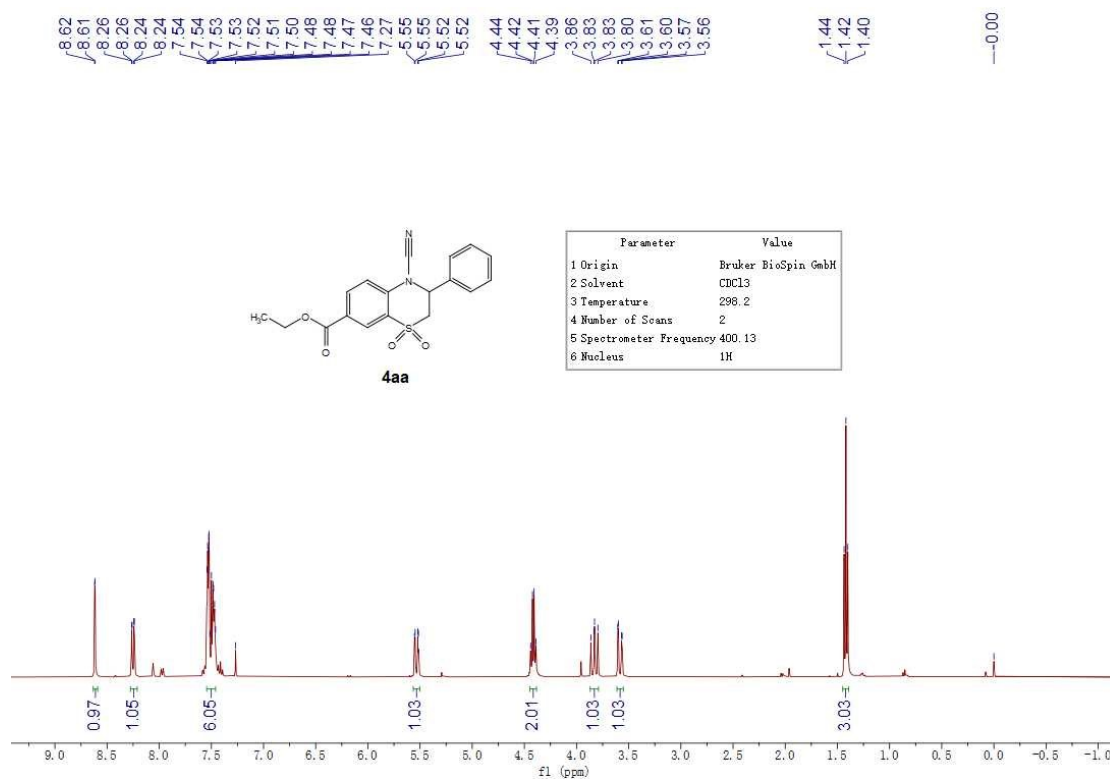

<sup>1</sup>H NMR spectrum of **4aa** (400 MHz, CDCl<sub>3</sub>)

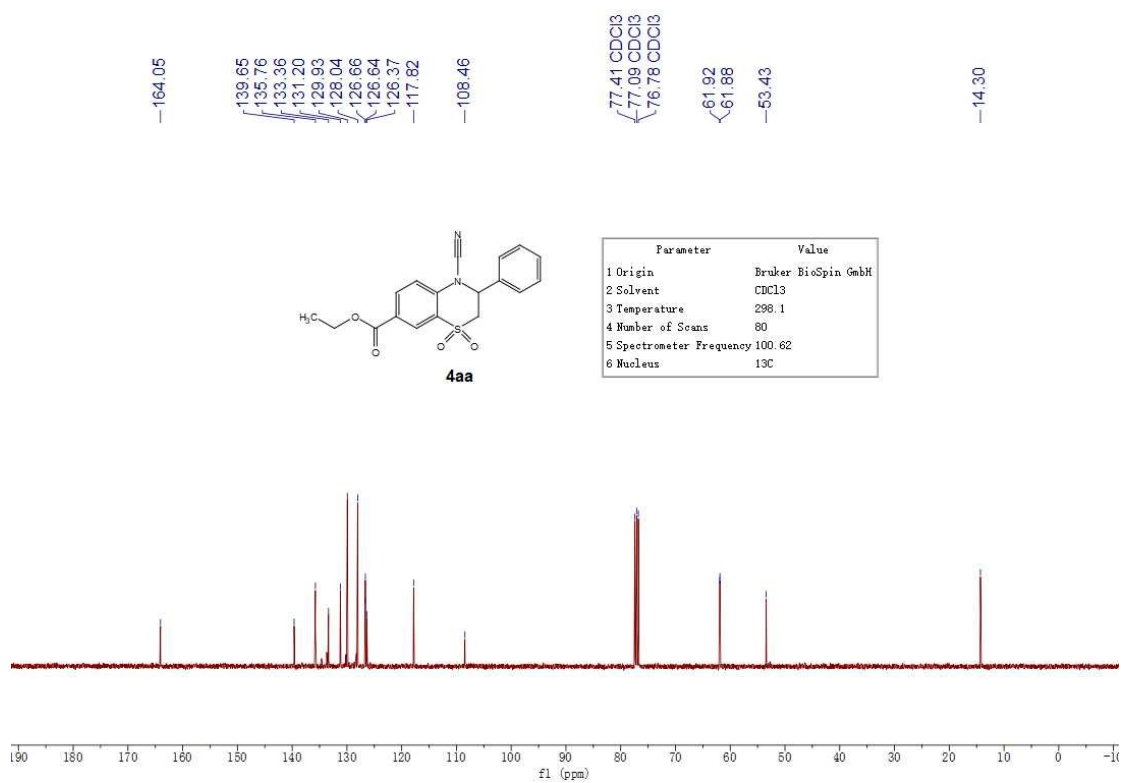

$^{13}\text{C}$  NMR spectrum of **4aa** (100 MHz,  $\text{CDCl}_3$ )

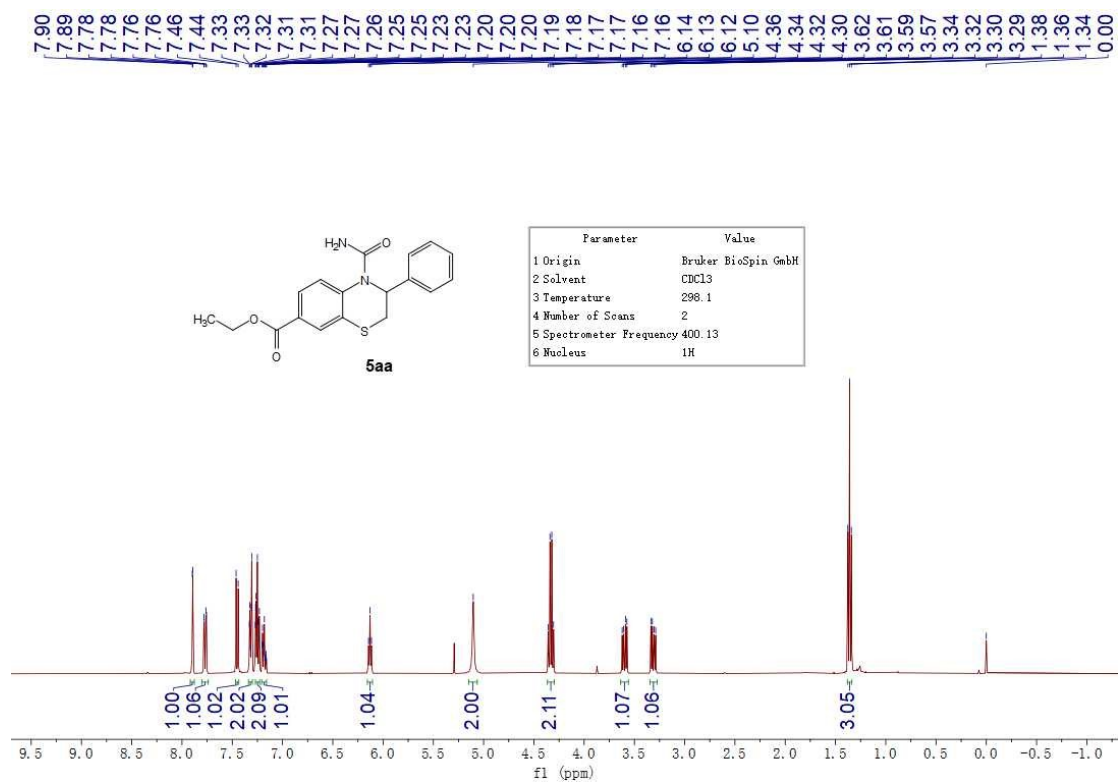

$^1\text{H}$  NMR spectrum of **5aa** (400 MHz,  $\text{CDCl}_3$ )

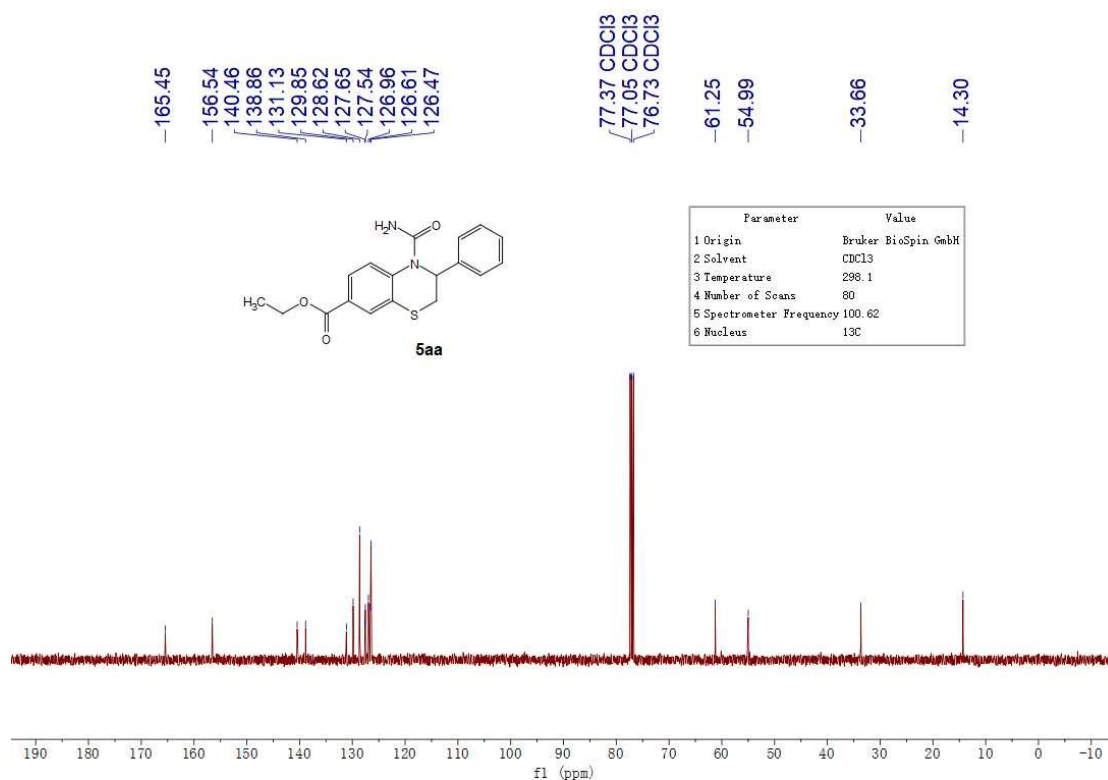

$^{13}\text{C}$  NMR spectrum of **5aa** (100 MHz,  $\text{CDCl}_3$ )

## 11. Cartesian Coordinates and Energies

### 1a

|   |             |             |             |
|---|-------------|-------------|-------------|
| C | -0.40024300 | -0.64833200 | -0.00062600 |
| C | -0.33449400 | 0.76728600  | -0.00472900 |
| C | -1.52546500 | 1.50129100  | -0.00352900 |
| C | -2.74192400 | 0.82418600  | 0.00263700  |
| C | -2.78916200 | -0.57637400 | 0.00858000  |
| C | -1.61414000 | -1.32855500 | 0.00788200  |
| C | 1.84006700  | 0.37802100  | 0.00032700  |
| H | -1.47814900 | 2.58473200  | -0.00738800 |
| H | -3.66812500 | 1.39027300  | 0.00287800  |
| H | -3.74785400 | -1.08492000 | 0.01324300  |
| H | -1.64888900 | -2.41284600 | 0.01188500  |
| S | 1.23597600  | -1.30671800 | -0.01102200 |
| N | 0.94254900  | 1.31177600  | 0.00260600  |
| N | 3.18881900  | 0.60841400  | -0.05937800 |
| H | 3.44245300  | 1.56731600  | 0.13775600  |
| H | 3.79753900  | -0.08352800 | 0.35213700  |

Zero-point correction= 0.119633 (Hartree/Particle)

Thermal correction to Energy= 0.127450

Thermal correction to Enthalpy= 0.128394

Thermal correction to Gibbs Free Energy= 0.087123

Sum of electronic and zero-point Energies= -777.989534

Sum of electronic and thermal Energies= -777.981716

Sum of electronic and thermal Enthalpies= -777.980772

Sum of electronic and thermal Free Energies= -778.022043

B3LYP-D3/6-311++G(d,p)-SDD/SMD//B3LYP-D3/6-31+G(d,p)-LANL2DZ energy = -778.246807

### 2a

|   |             |             |             |
|---|-------------|-------------|-------------|
| C | -1.78011800 | -1.04429000 | 0.00002100  |
| C | -0.40696700 | -1.28201500 | 0.00000100  |
| C | 0.51441500  | -0.22262400 | -0.00002000 |
| C | 0.01271000  | 1.09082600  | -0.00002800 |
| C | -1.35708300 | 1.33005500  | -0.00000900 |
| C | -2.26137200 | 0.26411900  | 0.00001700  |
| H | -2.47266900 | -1.88054400 | 0.00003800  |
| H | -0.03618100 | -2.30352000 | 0.00000400  |
| H | 0.69958000  | 1.93079700  | -0.00005700 |
| H | -1.72377100 | 2.35218700  | -0.00001700 |

|                                                              |             |             |                             |
|--------------------------------------------------------------|-------------|-------------|-----------------------------|
| H                                                            | -3.33009900 | 0.45469500  | 0.00003100                  |
| C                                                            | 1.95193800  | -0.53209500 | -0.00003300                 |
| C                                                            | 2.96953500  | 0.33614200  | 0.00004300                  |
| H                                                            | 2.18388900  | -1.59635800 | -0.00010700                 |
| H                                                            | 3.99744900  | -0.00987700 | 0.00002400                  |
| H                                                            | 2.82345200  | 1.41190700  | 0.00013100                  |
| Zero-point correction=                                       |             |             | 0.133588 (Hartree/Particle) |
| Thermal correction to Energy=                                |             |             | 0.140370                    |
| Thermal correction to Enthalpy=                              |             |             | 0.141314                    |
| Thermal correction to Gibbs Free Energy=                     |             |             | 0.101989                    |
| Sum of electronic and zero-point Energies=                   |             |             | -309.554914                 |
| Sum of electronic and thermal Energies=                      |             |             | -309.548132                 |
| Sum of electronic and thermal Enthalpies=                    |             |             | -309.547187                 |
| Sum of electronic and thermal Free Energies=                 |             |             | -309.586513                 |
| B3LYP-D3/6-311++G(d,p)-SDD/SMD//B3LYP-D3/6-31+G(d,p)-LANL2DZ |             |             | energy = -309.770148        |

#### PhI(OAc)<sub>2</sub>

|                                                              |             |             |                             |
|--------------------------------------------------------------|-------------|-------------|-----------------------------|
| C                                                            | 0.98215300  | 2.19279800  | 0.72240700                  |
| C                                                            | 0.97458200  | 3.58914000  | 0.71430000                  |
| C                                                            | -0.00005600 | 4.28616000  | 0.00000000                  |
| C                                                            | -0.97467500 | 3.58910900  | -0.71429400                 |
| C                                                            | -0.98220900 | 2.19276700  | -0.72239200                 |
| C                                                            | -0.00001900 | 1.52495600  | 0.00000900                  |
| H                                                            | 1.74690400  | 1.64367600  | 1.25521200                  |
| H                                                            | 1.73478300  | 4.12705800  | 1.27201700                  |
| H                                                            | -0.00007000 | 5.37161200  | -0.00000400                 |
| H                                                            | -1.73489100 | 4.12700300  | -1.27201400                 |
| H                                                            | -1.74694600 | 1.64362200  | -1.25519200                 |
| I                                                            | 0.00000800  | -0.62899800 | 0.00001500                  |
| O                                                            | 2.18209800  | -0.29242900 | -0.10860100                 |
| O                                                            | -2.18209000 | -0.29248100 | 0.10852100                  |
| C                                                            | 2.76495300  | -1.47422900 | -0.12153800                 |
| C                                                            | 4.27730300  | -1.39750800 | -0.18395500                 |
| H                                                            | 4.69472900  | -2.40385700 | -0.20395300                 |
| H                                                            | 4.58227600  | -0.84530000 | -1.07701100                 |
| H                                                            | 4.65588200  | -0.85182300 | 0.68487800                  |
| C                                                            | -2.76491300 | -1.47429800 | 0.12158000                  |
| C                                                            | -4.27726900 | -1.39761100 | 0.18383200                  |
| H                                                            | -4.65577400 | -0.85197300 | -0.68506200                 |
| H                                                            | -4.69467400 | -2.40396900 | 0.20383100                  |
| H                                                            | -4.58234400 | -0.84537200 | 1.07683400                  |
| O                                                            | 2.14051600  | -2.53011300 | -0.08753900                 |
| O                                                            | -2.14044700 | -2.53016600 | 0.08761600                  |
| Zero-point correction=                                       |             |             | 0.193141 (Hartree/Particle) |
| Thermal correction to Energy=                                |             |             | 0.210168                    |
| Thermal correction to Enthalpy=                              |             |             | 0.211112                    |
| Thermal correction to Gibbs Free Energy=                     |             |             | 0.144696                    |
| Sum of electronic and zero-point Energies=                   |             |             | -699.764581                 |
| Sum of electronic and thermal Energies=                      |             |             | -699.747554                 |
| Sum of electronic and thermal Enthalpies=                    |             |             | -699.746610                 |
| Sum of electronic and thermal Free Energies=                 |             |             | -699.813026                 |
| B3LYP-D3/6-311++G(d,p)-SDD/SMD//B3LYP-D3/6-31+G(d,p)-LANL2DZ |             |             | energy = -700.216862        |

#### PhI

|                                                              |             |             |                             |
|--------------------------------------------------------------|-------------|-------------|-----------------------------|
| C                                                            | -2.65765200 | -1.20693400 | 0.00000100                  |
| C                                                            | -1.26122400 | -1.21539400 | 0.00000100                  |
| C                                                            | -0.57901400 | -0.00000500 | 0.00000000                  |
| C                                                            | -1.26122200 | 1.21539300  | 0.00000000                  |
| C                                                            | -2.65764300 | 1.20693900  | 0.00000100                  |
| C                                                            | -3.35754700 | 0.00000200  | 0.00000100                  |
| H                                                            | -3.19470600 | -2.15067600 | 0.00000100                  |
| H                                                            | -0.71799100 | -2.15324400 | 0.00000000                  |
| H                                                            | -0.71797500 | 2.15323500  | 0.00000000                  |
| H                                                            | -3.19470100 | 2.15067800  | 0.00000200                  |
| H                                                            | -4.44298300 | 0.00001000  | 0.00000100                  |
| I                                                            | 1.56441800  | 0.00000000  | -0.00000100                 |
| Zero-point correction=                                       |             |             | 0.090250 (Hartree/Particle) |
| Thermal correction to Energy=                                |             |             | 0.096130                    |
| Thermal correction to Enthalpy=                              |             |             | 0.097074                    |
| Thermal correction to Gibbs Free Energy=                     |             |             | 0.058500                    |
| Sum of electronic and zero-point Energies=                   |             |             | -242.963958                 |
| Sum of electronic and thermal Energies=                      |             |             | -242.958078                 |
| Sum of electronic and thermal Enthalpies=                    |             |             | -242.957134                 |
| Sum of electronic and thermal Free Energies=                 |             |             | -242.995708                 |
| B3LYP-D3/6-311++G(d,p)-SDD/SMD//B3LYP-D3/6-31+G(d,p)-LANL2DZ |             |             | energy = -243.152906        |

#### AcOH

|   |             |             |             |
|---|-------------|-------------|-------------|
| C | -0.09155000 | 0.12523100  | 0.00044500  |
| O | -0.64329300 | 1.20243400  | -0.00014300 |
| O | -0.77929300 | -1.04564700 | -0.00014100 |

|                                                              |             |             |                             |
|--------------------------------------------------------------|-------------|-------------|-----------------------------|
| C                                                            | 1.39578100  | -0.11091000 | 0.00003300                  |
| H                                                            | 1.68012800  | -0.69307700 | 0.88122200                  |
| H                                                            | 1.67968300  | -0.69331700 | -0.88114500                 |
| H                                                            | 1.91521100  | 0.84603100  | -0.00023400                 |
| H                                                            | -1.71972300 | -0.79986000 | -0.00044000                 |
| Zero-point correction=                                       |             |             | 0.062022 (Hartree/Particle) |
| Thermal correction to Energy=                                |             |             | 0.066566                    |
| Thermal correction to Enthalpy=                              |             |             | 0.067511                    |
| Thermal correction to Gibbs Free Energy=                     |             |             | 0.034924                    |
| Sum of electronic and zero-point Energies=                   |             |             | -229.036463                 |
| Sum of electronic and thermal Energies=                      |             |             | -229.031918                 |
| Sum of electronic and thermal Enthalpies=                    |             |             | -229.030974                 |
| Sum of electronic and thermal Free Energies=                 |             |             | -229.063560                 |
| B3LYP-D3/6-311++G(d,p)-SDD/SMD//B3LYP-D3/6-31+G(d,p)-LANL2DZ |             |             | energy = -229.180854        |

#### INT1

|                                                              |             |             |                             |
|--------------------------------------------------------------|-------------|-------------|-----------------------------|
| C                                                            | 3.66545700  | 0.48339000  | 1.02539300                  |
| C                                                            | 3.93797000  | -0.10174900 | -0.23615600                 |
| C                                                            | 4.98212200  | -1.02696800 | -0.34408000                 |
| C                                                            | 5.72610200  | -1.34921100 | 0.78862700                  |
| C                                                            | 5.44521500  | -0.75981900 | 2.02864800                  |
| C                                                            | 4.40907300  | 0.16657300  | 2.15805900                  |
| C                                                            | 2.23193400  | 1.15830500  | -0.85938100                 |
| H                                                            | 5.19572700  | -1.47476300 | -1.30889400                 |
| H                                                            | 6.53651600  | -2.06726400 | 0.70884200                  |
| H                                                            | 6.03663800  | -1.02421000 | 2.89950200                  |
| H                                                            | 4.18962400  | 0.62309900  | 3.11764100                  |
| S                                                            | 2.30813600  | 1.59688100  | 0.87122900                  |
| N                                                            | 3.11273000  | 0.30061800  | -1.27711600                 |
| N                                                            | 1.22939500  | 1.66365400  | -1.62911000                 |
| H                                                            | 1.31554800  | 1.50343700  | -2.62223700                 |
| H                                                            | 0.66825400  | 2.45205000  | -1.32001100                 |
| C                                                            | -2.99872800 | -2.18427100 | -0.23765300                 |
| C                                                            | -4.00307600 | -3.02111100 | 0.25501600                  |
| C                                                            | -4.71361200 | -2.67418300 | 1.40450400                  |
| C                                                            | -4.42814900 | -1.48343800 | 2.07489800                  |
| C                                                            | -3.42289900 | -0.63593700 | 1.60698600                  |
| C                                                            | -2.73198900 | -1.01194700 | 0.46026300                  |
| H                                                            | -2.44284600 | -2.43275500 | -1.13489300                 |
| H                                                            | -4.23041400 | -3.94268600 | -0.27151700                 |
| H                                                            | -5.49376100 | -3.33035200 | 1.77748000                  |
| H                                                            | -4.98258500 | -1.21036800 | 2.96723600                  |
| H                                                            | -3.20244800 | 0.29873000  | 2.10714700                  |
| I                                                            | -1.17922100 | 0.26886500  | -0.26601800                 |
| O                                                            | 0.21556300  | -1.36145000 | -0.27441500                 |
| O                                                            | -2.72133700 | 1.86160700  | 0.04417200                  |
| C                                                            | 0.31095100  | -2.05572100 | -1.40920800                 |
| C                                                            | 1.61386000  | -2.82071800 | -1.48233200                 |
| H                                                            | 1.52806300  | -3.62778900 | -2.21045100                 |
| H                                                            | 2.38472200  | -2.11142000 | -1.80140400                 |
| H                                                            | 1.90164900  | -3.20310800 | -0.50168300                 |
| C                                                            | -2.18246900 | 3.02956100  | -0.18990000                 |
| C                                                            | -3.12692100 | 4.19175500  | 0.04678200                  |
| H                                                            | -4.00182900 | 4.09084800  | -0.60138100                 |
| H                                                            | -3.48284500 | 4.17322200  | 1.08054100                  |
| H                                                            | -2.61614000 | 5.13261000  | -0.15695700                 |
| O                                                            | -0.52838800 | -2.05077700 | -2.29655900                 |
| O                                                            | -1.01824700 | 3.19734700  | -0.56931200                 |
| Zero-point correction=                                       |             |             | 0.314032 (Hartree/Particle) |
| Thermal correction to Energy=                                |             |             | 0.340640                    |
| Thermal correction to Enthalpy=                              |             |             | 0.341584                    |
| Thermal correction to Gibbs Free Energy=                     |             |             | 0.251393                    |
| Sum of electronic and zero-point Energies=                   |             |             | -1477.765734                |
| Sum of electronic and thermal Energies=                      |             |             | -1477.739125                |
| Sum of electronic and thermal Enthalpies=                    |             |             | -1477.738181                |
| Sum of electronic and thermal Free Energies=                 |             |             | -1477.828372                |
| B3LYP-D3/6-311++G(d,p)-SDD/SMD//B3LYP-D3/6-31+G(d,p)-LANL2DZ |             |             | energy = -1478.475749       |

#### TS1

|   |            |             |             |
|---|------------|-------------|-------------|
| C | 3.75698300 | 0.06852200  | 0.95005900  |
| C | 3.73815700 | -0.60173700 | -0.30192500 |
| C | 4.71035300 | -1.57597600 | -0.56643800 |
| C | 5.66673900 | -1.86568800 | 0.40273500  |
| C | 5.67167300 | -1.19491100 | 1.63412400  |
| C | 4.71557900 | -0.21814700 | 1.91766400  |
| C | 1.97001000 | 0.69734300  | -0.64187500 |
| H | 4.70522200 | -2.08179600 | -1.52650300 |
| H | 6.42151300 | -2.61971800 | 0.20124600  |
| H | 6.42657400 | -1.43430700 | 2.37647600  |
| H | 4.72081000 | 0.30221500  | 2.86991800  |

|                                                                       |             |             |                             |
|-----------------------------------------------------------------------|-------------|-------------|-----------------------------|
| S                                                                     | 2.43965100  | 1.23216700  | 1.00460200                  |
| N                                                                     | 2.72298100  | -0.23472000 | -1.16587700                 |
| N                                                                     | 0.85941000  | 1.24211100  | -1.19821700                 |
| H                                                                     | 0.77457800  | 0.91972800  | -2.16185500                 |
| H                                                                     | 0.45445100  | 2.51306300  | -0.90672500                 |
| C                                                                     | -3.64058100 | -1.67817700 | -0.44259700                 |
| C                                                                     | -4.70151400 | -2.48211800 | -0.02621200                 |
| C                                                                     | -5.06962200 | -2.51544400 | 1.32108700                  |
| C                                                                     | -4.37544500 | -1.75161900 | 2.26056700                  |
| C                                                                     | -3.30419400 | -0.95176400 | 1.85774500                  |
| C                                                                     | -2.95077600 | -0.92656300 | 0.50992700                  |
| H                                                                     | -3.34268100 | -1.64869000 | -1.48563600                 |
| H                                                                     | -5.24201000 | -3.07901200 | -0.75437700                 |
| H                                                                     | -5.89996400 | -3.13833700 | 1.63891400                  |
| H                                                                     | -4.66119200 | -1.78131100 | 3.30747000                  |
| H                                                                     | -2.75570400 | -0.36277400 | 2.58551400                  |
| I                                                                     | -1.32375600 | 0.33069100  | -0.15652000                 |
| O                                                                     | -0.22154600 | -1.43861400 | -0.25322000                 |
| O                                                                     | -1.93386200 | 2.87874200  | -0.02329400                 |
| C                                                                     | -0.08706200 | -1.95599700 | -1.49091800                 |
| C                                                                     | 0.90633700  | -3.09393000 | -1.47644400                 |
| H                                                                     | 0.71336700  | -3.74642200 | -2.32829400                 |
| H                                                                     | 1.89766300  | -2.64144400 | -1.57349700                 |
| H                                                                     | 0.86675400  | -3.64789800 | -0.53801800                 |
| C                                                                     | -1.07573800 | 3.76265400  | -0.23259100                 |
| C                                                                     | -1.43569200 | 5.21430000  | 0.00876300                  |
| H                                                                     | -1.34787200 | 5.76882200  | -0.93016700                 |
| H                                                                     | -2.44996500 | 5.29786000  | 0.39777500                  |
| H                                                                     | -0.72242000 | 5.65289000  | 0.71229900                  |
| O                                                                     | -0.66246600 | -1.53688700 | -2.47372900                 |
| O                                                                     | 0.13256500  | 3.57796100  | -0.65175200                 |
| Zero-point correction=                                                |             |             | 0.309599 (Hartree/Particle) |
| Thermal correction to Energy=                                         |             |             | 0.335381                    |
| Thermal correction to Enthalpy=                                       |             |             | 0.336325                    |
| Thermal correction to Gibbs Free Energy=                              |             |             | 0.247540                    |
| Sum of electronic and zero-point Energies=                            |             |             | -1477.740588                |
| Sum of electronic and thermal Energies=                               |             |             | -1477.714806                |
| Sum of electronic and thermal Enthalpies=                             |             |             | -1477.713862                |
| Sum of electronic and thermal Free Energies=                          |             |             | -1477.802648                |
| B3LYP-D3/6-311++G(d,p)-SDD/SMD//B3LYP-D3/6-31+G(d,p)-LANL2DZ energy = |             |             | -1478.446944                |

## INT2

|                                          |             |             |                             |
|------------------------------------------|-------------|-------------|-----------------------------|
| C                                        | -3.00529800 | -0.92128900 | 0.07537000                  |
| C                                        | -3.06958300 | 0.50426300  | 0.12374100                  |
| C                                        | -4.28304200 | 1.15641500  | -0.16882000                 |
| C                                        | -5.38874600 | 0.39514700  | -0.50699600                 |
| C                                        | -5.31010200 | -1.01191700 | -0.55733300                 |
| C                                        | -4.12527500 | -1.68127000 | -0.27110300                 |
| C                                        | -0.93619400 | 0.28042200  | 0.68024800                  |
| H                                        | -4.31972200 | 2.23926900  | -0.12744600                 |
| H                                        | -6.32979500 | 0.88366400  | -0.73804400                 |
| H                                        | -6.19275200 | -1.58526900 | -0.82314900                 |
| H                                        | -4.07532800 | -2.76411500 | -0.31046400                 |
| S                                        | -1.40262500 | -1.45063000 | 0.50331200                  |
| N                                        | -1.89966600 | 1.13983900  | 0.43528300                  |
| N                                        | 0.30848400  | 0.58407200  | 1.12280900                  |
| H                                        | 0.40231300  | 1.65162000  | 1.30469900                  |
| C                                        | 1.78066800  | -2.51887500 | -1.17914900                 |
| C                                        | 1.77415200  | -3.89179700 | -0.92176700                 |
| C                                        | 1.87835500  | -4.35758500 | 0.38877700                  |
| C                                        | 1.99500200  | -3.45242300 | 1.44643700                  |
| C                                        | 2.01237300  | -2.07985100 | 1.19845000                  |
| C                                        | 1.90662700  | -1.62613900 | -0.11620100                 |
| H                                        | 1.67502300  | -2.15549200 | -2.19653700                 |
| H                                        | 1.67374800  | -4.59241700 | -1.74506900                 |
| H                                        | 1.86388200  | -5.42468800 | 0.58768100                  |
| H                                        | 2.07111900  | -3.81393600 | 2.46735300                  |
| H                                        | 2.07616700  | -1.37093300 | 2.01578900                  |
| I                                        | 1.89582900  | 0.48733500  | -0.52604800                 |
| O                                        | 1.44951600  | 2.91808800  | -0.72294300                 |
| C                                        | 1.06633300  | 3.61135900  | 0.28005300                  |
| C                                        | 1.04194600  | 5.11887200  | 0.05618400                  |
| H                                        | 0.16831400  | 5.36887200  | -0.55485300                 |
| H                                        | 0.96786500  | 5.64005400  | 1.01153400                  |
| H                                        | 1.93147200  | 5.43860100  | -0.49118300                 |
| O                                        | 0.69619900  | 3.16275300  | 1.39210200                  |
| Zero-point correction=                   |             |             | 0.248967 (Hartree/Particle) |
| Thermal correction to Energy=            |             |             | 0.269428                    |
| Thermal correction to Enthalpy=          |             |             | 0.270372                    |
| Thermal correction to Gibbs Free Energy= |             |             | 0.194698                    |

Sum of electronic and zero-point Energies= -1248.695344  
 Sum of electronic and thermal Energies= -1248.674883  
 Sum of electronic and thermal Enthalpies= -1248.673939  
 Sum of electronic and thermal Free Energies= -1248.749613  
 B3LYP-D3/6-311++G(d,p)-SDD/SMD//B3LYP-D3/6-31+G(d,p)-LANL2DZ energy = -1249.269409

**TS2**

|   |             |             |             |
|---|-------------|-------------|-------------|
| C | -2.98109000 | -0.97930000 | 0.07863700  |
| C | -3.08191400 | 0.44598100  | 0.08120200  |
| C | -4.31384800 | 1.05777300  | -0.22578700 |
| C | -5.40131500 | 0.25988000  | -0.53506000 |
| C | -5.28659400 | -1.14607300 | -0.54234000 |
| C | -4.08440600 | -1.77593300 | -0.24123600 |
| C | -0.93020200 | 0.30828700  | 0.63327900  |
| H | -4.37723400 | 2.14021100  | -0.21794100 |
| H | -6.35540000 | 0.71698700  | -0.77682400 |
| H | -6.15556100 | -1.74948500 | -0.78616100 |
| H | -4.00748400 | -2.85790900 | -0.24750600 |
| S | -1.36820400 | -1.45467800 | 0.51661600  |
| N | -1.93003800 | 1.12306200  | 0.35859300  |
| N | 0.28396500  | 0.67789800  | 1.08154000  |
| H | 0.37099100  | 1.91910200  | 1.21713100  |
| C | 1.90013200  | -2.52775200 | -1.16106200 |
| C | 1.90753800  | -3.89414800 | -0.87148900 |
| C | 1.95207000  | -4.32913500 | 0.45307200  |
| C | 1.99347500  | -3.39932100 | 1.49448900  |
| C | 1.99573200  | -2.03216600 | 1.21752900  |
| C | 1.95098700  | -1.61299100 | -0.11149500 |
| H | 1.84304000  | -2.18793000 | -2.18998100 |
| H | 1.86560100  | -4.61430400 | -1.68282300 |
| H | 1.94910900  | -5.39175200 | 0.67487000  |
| H | 2.02092000  | -3.73640100 | 2.52609500  |
| H | 1.99573300  | -1.30231500 | 2.01877400  |
| I | 1.90167000  | 0.48628200  | -0.54040100 |
| O | 1.46780700  | 3.05827000  | -0.71358200 |
| C | 0.97772500  | 3.68315500  | 0.25797700  |
| C | 0.91874300  | 5.19926800  | 0.19343100  |
| H | -0.12406000 | 5.50573300  | 0.06248100  |
| H | 1.26775200  | 5.62303300  | 1.13845900  |
| H | 1.51428500  | 5.57534700  | -0.63864100 |
| O | 0.49661500  | 3.15544000  | 1.32228900  |

Zero-point correction= 0.244930 (Hartree/Particle)  
 Thermal correction to Energy= 0.265153  
 Thermal correction to Enthalpy= 0.266097  
 Thermal correction to Gibbs Free Energy= 0.190930  
 Sum of electronic and zero-point Energies= -1248.697856  
 Sum of electronic and thermal Energies= -1248.677633  
 Sum of electronic and thermal Enthalpies= -1248.676688  
 Sum of electronic and thermal Free Energies= -1248.751856  
 B3LYP-D3/6-311++G(d,p)-SDD/SMD//B3LYP-D3/6-31+G(d,p)-LANL2DZ energy = -1249.265191

**INT3**

|   |             |             |             |
|---|-------------|-------------|-------------|
| C | 0.27103800  | 0.72650400  | -0.00010400 |
| C | 0.09619000  | -0.76372400 | 0.00001800  |
| C | 1.28346200  | -1.59786200 | 0.00027400  |
| C | 2.52373100  | -1.05386600 | 0.00022700  |
| C | 2.69821900  | 0.37771100  | -0.00016200 |
| C | 1.62969100  | 1.21787800  | -0.00045600 |
| C | -2.25825500 | -0.91395500 | -0.00038000 |
| H | 1.11920500  | -2.66902100 | 0.00041600  |
| H | 3.40103900  | -1.69227600 | 0.00039500  |
| H | 3.70506800  | 0.78332000  | -0.00022700 |
| H | 1.76013700  | 2.29378800  | -0.00081500 |
| S | -1.01592000 | 1.76924600  | 0.00030500  |
| N | -1.03724200 | -1.41195600 | -0.00011700 |
| N | -3.41921300 | -0.72802300 | -0.00004700 |

Zero-point correction= 0.093881 (Hartree/Particle)  
 Thermal correction to Energy= 0.102119  
 Thermal correction to Enthalpy= 0.103063  
 Thermal correction to Gibbs Free Energy= 0.059665  
 Sum of electronic and zero-point Energies= -776.711046  
 Sum of electronic and thermal Energies= -776.702808  
 Sum of electronic and thermal Enthalpies= -776.701864  
 Sum of electronic and thermal Free Energies= -776.745262  
 B3LYP-D3/6-311++G(d,p)-SDD/SMD//B3LYP-D3/6-31+G(d,p)-LANL2DZ energy = -776.943953

**TS3**

|   |             |            |             |
|---|-------------|------------|-------------|
| C | 1.05333300  | 2.76491600 | 0.02084400  |
| C | -0.00820000 | 2.35238600 | -0.74350100 |
| C | -0.88631100 | 1.32079400 | -0.29842500 |



|                                              |             |             |                             |
|----------------------------------------------|-------------|-------------|-----------------------------|
| C                                            | -0.63667500 | 0.70961400  | 1.00416000                  |
| C                                            | 0.54677700  | 1.10317300  | 1.71058900                  |
| C                                            | 1.34668200  | 2.11212000  | 1.24937000                  |
| H                                            | 1.69207200  | 3.57097500  | -0.32572200                 |
| H                                            | -0.21084200 | 2.80465600  | -1.70816500                 |
| H                                            | 0.74611900  | 0.59728000  | 2.64765600                  |
| H                                            | 2.21468100  | 2.41923300  | 1.82401700                  |
| C                                            | -0.60726000 | -1.91159800 | -0.46345200                 |
| C                                            | -1.50725400 | -1.54734700 | -1.46088100                 |
| H                                            | -2.51776700 | -1.93230800 | -1.40340800                 |
| N                                            | -1.34476300 | -0.27775200 | 1.55140300                  |
| C                                            | -2.59707800 | -0.60925700 | 1.29777800                  |
| N                                            | -3.68599300 | -1.04959200 | 1.25959300                  |
| C                                            | 0.77351600  | -1.51544600 | -0.41656200                 |
| C                                            | 1.58779700  | -1.96420200 | 0.65000700                  |
| C                                            | 1.33261200  | -0.61695900 | -1.35099500                 |
| C                                            | 2.90490300  | -1.54935700 | 0.76368600                  |
| H                                            | 1.15706000  | -2.63101400 | 1.39053000                  |
| C                                            | 2.65053300  | -0.19470900 | -1.22652000                 |
| H                                            | 0.72785900  | -0.24208200 | -2.16744100                 |
| C                                            | 3.44045400  | -0.65733500 | -0.17347400                 |
| H                                            | 3.51596500  | -1.90471500 | 1.58713300                  |
| H                                            | 3.06045000  | 0.50564000  | -1.94662600                 |
| H                                            | 4.46868100  | -0.32285900 | -0.07775200                 |
| H                                            | -1.13884800 | -1.32341800 | -2.45666900                 |
| H                                            | -0.96561200 | -2.53300000 | 0.34976500                  |
| S                                            | -2.11859300 | 0.71889100  | -1.29787700                 |
| Zero-point correction=                       |             |             | 0.229618 (Hartree/Particle) |
| Thermal correction to Energy=                |             |             | 0.244658                    |
| Thermal correction to Enthalpy=              |             |             | 0.245602                    |
| Thermal correction to Gibbs Free Energy=     |             |             | 0.187430                    |
| Sum of electronic and zero-point Energies=   |             |             | -1086.281944                |
| Sum of electronic and thermal Energies=      |             |             | -1086.266904                |
| Sum of electronic and thermal Enthalpies=    |             |             | -1086.265959                |
| Sum of electronic and thermal Free Energies= |             |             | -1086.324131                |

B3LYP-D3/6-311++G(d,p)-SDD/SMD//B3LYP-D3/6-31+G(d,p)-LANL2DZ energy = -1086.728456

#### TS3'

|                                              |             |             |                             |
|----------------------------------------------|-------------|-------------|-----------------------------|
| C                                            | -0.45545100 | 2.59875100  | 1.05509900                  |
| C                                            | -0.48116100 | 1.38688100  | 1.69566500                  |
| C                                            | 0.49017000  | 0.38064500  | 1.41129000                  |
| C                                            | 1.43179600  | 0.62790900  | 0.33211600                  |
| C                                            | 1.41120900  | 1.89595100  | -0.32995100                 |
| C                                            | 0.51333900  | 2.85894700  | 0.04650000                  |
| H                                            | -1.17934300 | 3.36549300  | 1.31122000                  |
| H                                            | -1.22061900 | 1.17014300  | 2.45767700                  |
| H                                            | 2.13435200  | 2.07834500  | -1.11825600                 |
| H                                            | 0.52514600  | 3.82695000  | -0.44487700                 |
| C                                            | 1.05240700  | -2.22648200 | -0.66647300                 |
| C                                            | -0.20535000 | -2.17096700 | -0.09618700                 |
| N                                            | 2.23395000  | -0.39541900 | -0.02485600                 |
| C                                            | 3.08167400  | -0.22371900 | -1.03712100                 |
| N                                            | 3.85220500  | -0.18923700 | -1.91883600                 |
| H                                            | 1.23449100  | -1.82452600 | -1.65441700                 |
| S                                            | 0.48331500  | -1.11340600 | 2.19687700                  |
| H                                            | 1.79075300  | -2.91889300 | -0.28498900                 |
| H                                            | -0.49140400 | -2.94033300 | 0.61414100                  |
| C                                            | -1.24864700 | -1.25613500 | -0.54029400                 |
| C                                            | -2.53349100 | -1.33304400 | 0.03219100                  |
| C                                            | -0.98986500 | -0.22628300 | -1.46374400                 |
| C                                            | -3.52196200 | -0.42160600 | -0.31099200                 |
| H                                            | -2.73625300 | -2.10583800 | 0.76766300                  |
| C                                            | -1.98081400 | 0.69099600  | -1.80238800                 |
| H                                            | -0.01175400 | -0.13612300 | -1.91956000                 |
| C                                            | -3.24720800 | 0.59924900  | -1.22829300                 |
| H                                            | -4.50599400 | -0.49579200 | 0.14103800                  |
| H                                            | -1.75749700 | 1.48330300  | -2.50935800                 |
| H                                            | -4.01787700 | 1.31780500  | -1.48896300                 |
| Zero-point correction=                       |             |             | 0.229951 (Hartree/Particle) |
| Thermal correction to Energy=                |             |             | 0.244967                    |
| Thermal correction to Enthalpy=              |             |             | 0.245911                    |
| Thermal correction to Gibbs Free Energy=     |             |             | 0.187173                    |
| Sum of electronic and zero-point Energies=   |             |             | -1086.278978                |
| Sum of electronic and thermal Energies=      |             |             | -1086.263962                |
| Sum of electronic and thermal Enthalpies=    |             |             | -1086.263017                |
| Sum of electronic and thermal Free Energies= |             |             | -1086.321755                |

B3LYP-D3/6-311++G(d,p)-SDD/SMD//B3LYP-D3/6-31+G(d,p)-LANL2DZ energy = -1086.723899

#### INT4

|   |             |            |            |
|---|-------------|------------|------------|
| C | -3.83983400 | 0.72933900 | 1.08567300 |
|---|-------------|------------|------------|

|                                                             |             |             |                             |
|-------------------------------------------------------------|-------------|-------------|-----------------------------|
| C                                                           | -2.86855200 | 1.51754400  | 0.48162600                  |
| C                                                           | -1.73113800 | 0.94961600  | -0.10766500                 |
| C                                                           | -1.57924800 | -0.45005600 | -0.09570300                 |
| C                                                           | -2.57416700 | -1.24056200 | 0.49852500                  |
| C                                                           | -3.68953800 | -0.65822500 | 1.08714500                  |
| H                                                           | -4.70922200 | 1.19246100  | 1.53983400                  |
| H                                                           | -2.97960600 | 2.59715200  | 0.45403300                  |
| H                                                           | -2.45862700 | -2.31871600 | 0.50163000                  |
| H                                                           | -4.44065600 | -1.29364000 | 1.54430600                  |
| C                                                           | 0.72375500  | -0.38842000 | -1.24159800                 |
| C                                                           | 0.26295600  | 0.89142300  | -1.94782200                 |
| H                                                           | -0.42667100 | 0.64569400  | -2.75948500                 |
| N                                                           | -0.44855100 | -1.09180000 | -0.67880100                 |
| C                                                           | -0.32351500 | -2.41951600 | -0.58099700                 |
| N                                                           | -0.19881400 | -3.57864300 | -0.52378900                 |
| C                                                           | 1.82455700  | -0.14912800 | -0.22603000                 |
| C                                                           | 1.55959400  | -0.01647600 | 1.13879400                  |
| C                                                           | 3.14046200  | -0.02477600 | -0.68310600                 |
| C                                                           | 2.59827500  | 0.24407600  | 2.03215400                  |
| H                                                           | 0.54511900  | -0.12038700 | 1.50615700                  |
| C                                                           | 4.17806000  | 0.24001600  | 0.20816700                  |
| H                                                           | 3.35539000  | -0.14311400 | -1.74264100                 |
| C                                                           | 3.90753900  | 0.37564200  | 1.57053500                  |
| H                                                           | 2.38188700  | 0.34348000  | 3.09115800                  |
| H                                                           | 5.19593900  | 0.32943600  | -0.15832600                 |
| H                                                           | 4.71434800  | 0.57581600  | 2.26855700                  |
| H                                                           | 1.13165000  | 1.40577300  | -2.36168200                 |
| H                                                           | 1.11399500  | -1.05244100 | -2.02085100                 |
| S                                                           | -0.52670200 | 2.05803700  | -0.79767100                 |
| Zero-point correction=                                      |             |             | 0.234620 (Hartree/Particle) |
| Thermal correction to Energy=                               |             |             | 0.249109                    |
| Thermal correction to Enthalpy=                             |             |             | 0.250053                    |
| Thermal correction to Gibbs Free Energy=                    |             |             | 0.191173                    |
| Sum of electronic and zero-point Energies=                  |             |             | -1086.348683                |
| Sum of electronic and thermal Energies=                     |             |             | -1086.334194                |
| Sum of electronic and thermal Enthalpies=                   |             |             | -1086.333250                |
| Sum of electronic and thermal Free Energies=                |             |             | -1086.392130                |
| B3LYP-D3/6-311++G(d,p)-SDD/SMD/B3LYP-D3/6-31+G(d,p)-LANL2DZ |             |             | energy = -1086.795447       |

### TS3''

|                                                             |             |             |                             |
|-------------------------------------------------------------|-------------|-------------|-----------------------------|
| C                                                           | -0.44087600 | 2.75075900  | 0.87953000                  |
| C                                                           | -0.13532200 | 1.57980100  | 1.52928400                  |
| C                                                           | 0.80685200  | 0.65686800  | 0.98747400                  |
| C                                                           | 1.40029800  | 0.97054900  | -0.29801100                 |
| C                                                           | 0.98885600  | 2.15126800  | -0.98056300                 |
| C                                                           | 0.12588300  | 3.03993600  | -0.38857400                 |
| H                                                           | -1.14103400 | 3.45092700  | 1.32558900                  |
| H                                                           | -0.59919900 | 1.32957400  | 2.47700900                  |
| H                                                           | 1.43263900  | 2.34566700  | -1.95130600                 |
| H                                                           | -0.13169400 | 3.96576400  | -0.89438300                 |
| C                                                           | 0.98244000  | -1.69463100 | -1.45411500                 |
| C                                                           | 0.03845600  | -1.93246300 | -0.46205000                 |
| N                                                           | 2.22492100  | 0.13405200  | -0.97625600                 |
| C                                                           | 3.19049100  | -0.56584600 | -0.38434300                 |
| N                                                           | 4.14699800  | -1.16385600 | -0.06499600                 |
| H                                                           | 0.72274200  | -1.14687000 | -2.35018500                 |
| S                                                           | 1.07903100  | -0.86302500 | 1.68533200                  |
| H                                                           | 1.86332500  | -2.32086200 | -1.51433600                 |
| H                                                           | 0.16503800  | -2.81543200 | 0.15675000                  |
| C                                                           | -1.27138200 | -1.28536800 | -0.42552100                 |
| C                                                           | -2.26570000 | -1.77614100 | 0.44166100                  |
| C                                                           | -1.55965200 | -0.14729200 | -1.19765400                 |
| C                                                           | -3.50563300 | -1.15720900 | 0.52590200                  |
| H                                                           | -2.04519700 | -2.64047900 | 1.06210800                  |
| C                                                           | -2.79863700 | 0.48136200  | -1.10266200                 |
| H                                                           | -0.81108700 | 0.26095400  | -1.86593200                 |
| C                                                           | -3.77636600 | -0.02103200 | -0.24526300                 |
| H                                                           | -4.26172800 | -1.55134200 | 1.19854100                  |
| H                                                           | -2.99670600 | 1.36747500  | -1.69835400                 |
| H                                                           | -4.74327800 | 0.46829300  | -0.17263100                 |
| Zero-point correction=                                      |             |             | 0.230049 (Hartree/Particle) |
| Thermal correction to Energy=                               |             |             | 0.245091                    |
| Thermal correction to Enthalpy=                             |             |             | 0.246035                    |
| Thermal correction to Gibbs Free Energy=                    |             |             | 0.186787                    |
| Sum of electronic and zero-point Energies=                  |             |             | -1086.247980                |
| Sum of electronic and thermal Energies=                     |             |             | -1086.232939                |
| Sum of electronic and thermal Enthalpies=                   |             |             | -1086.231994                |
| Sum of electronic and thermal Free Energies=                |             |             | -1086.291243                |
| B3LYP-D3/6-311++G(d,p)-SDD/SMD/B3LYP-D3/6-31+G(d,p)-LANL2DZ |             |             | energy = -1086.713186       |
